# Supplementary material for: The Omicron Lineages BA.1 and BA.2 (Betacoronavirus SARS-CoV-2) Have Repeatedly Entered Brazil through a Single Dispersal Hub
Source: MDPI journal article supplement (doi:10.3390/v15040888), 2023-03-30
Supplement: s1 [file s1]

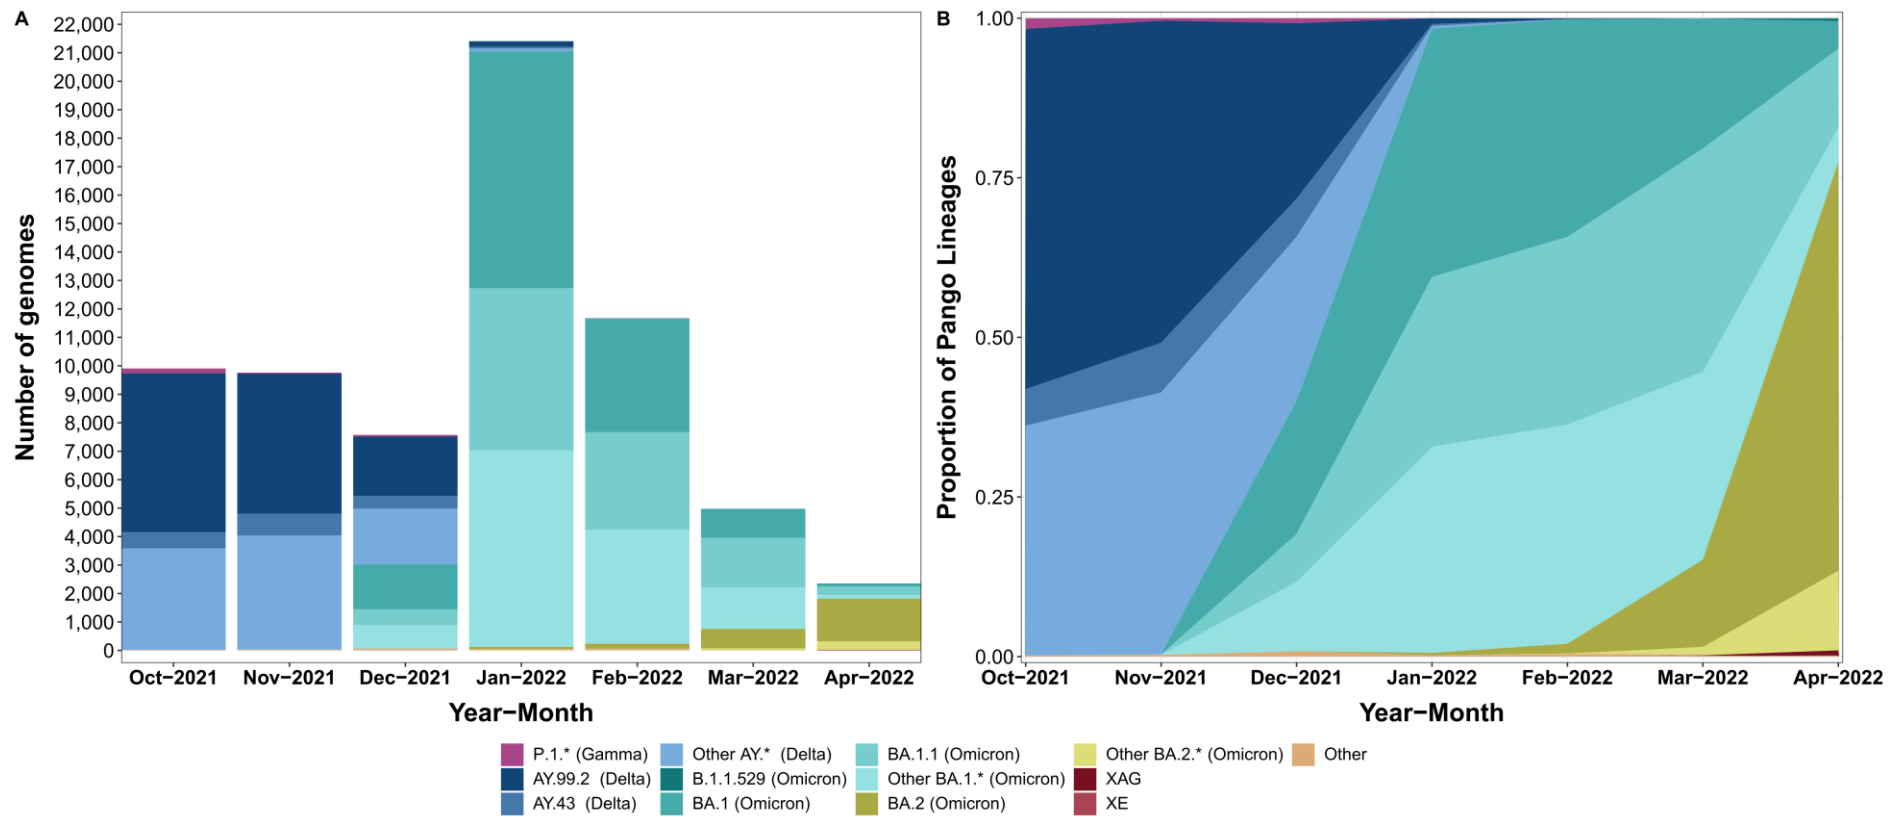

**Figure S1. Distribution of SARS-CoV-2 lineages in Brazil between October 2021 and April 2022.** In (A) is represented the absolute number of genomes by lineage and in (B), their relative frequency.

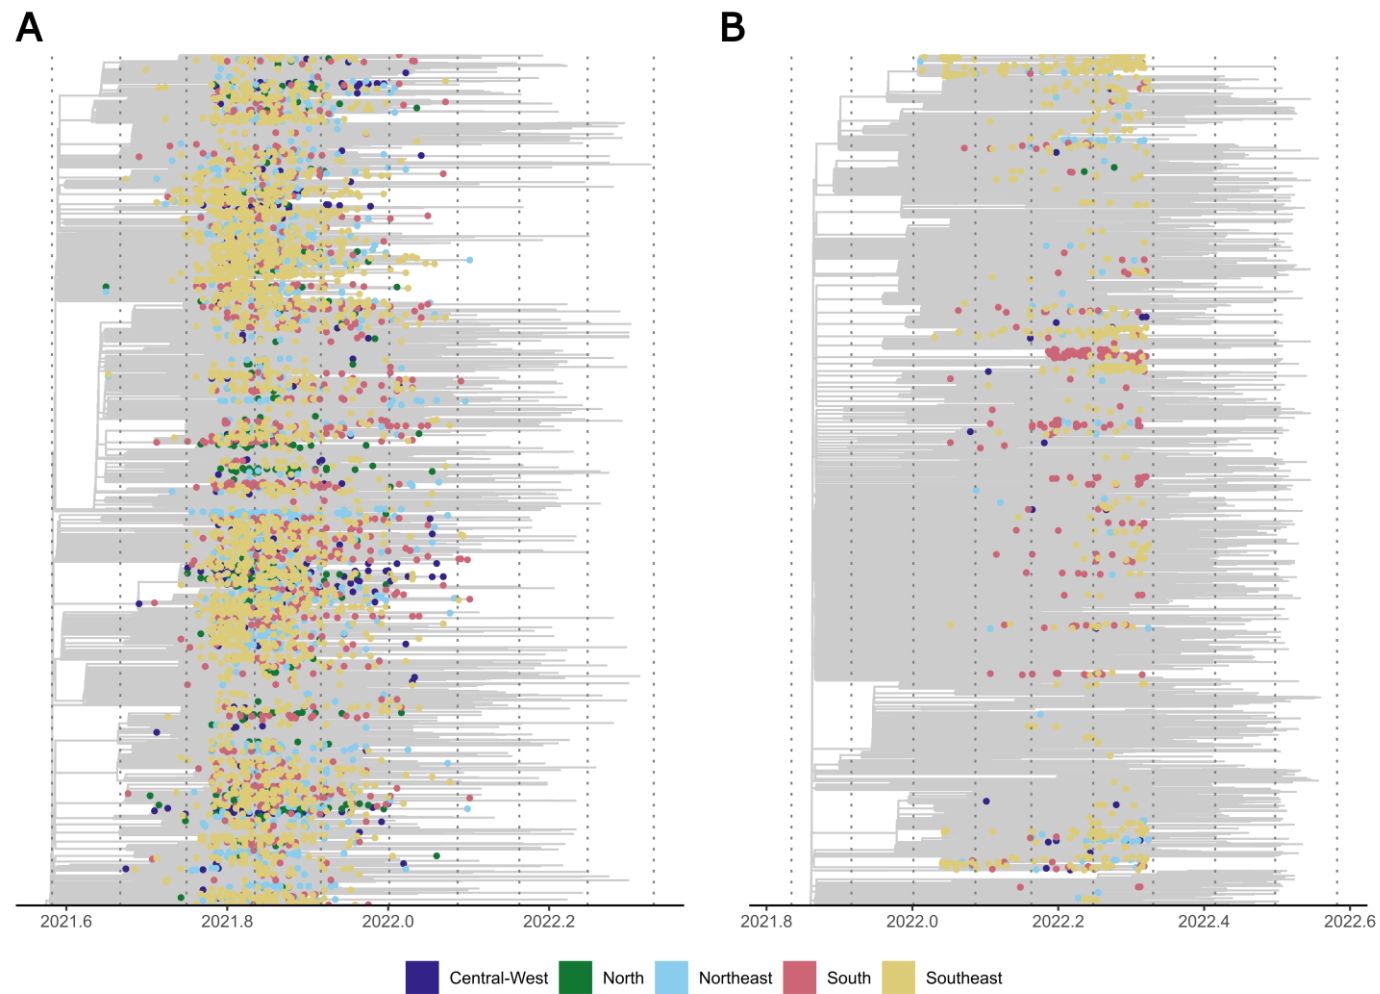

**Figure S2. The time tree of the BA.1 (A) and BA.2 (B) sequences analyzed.** Colors represent the region of collection of the Brazilian sequences, evidencing the multiple introductions in the country.
