# Supplementary material for: The Omicron Lineages BA.1 and BA.2 (Betacoronavirus SARS-CoV-2) Have Repeatedly Entered Brazil through a Single Dispersal Hub
Source: Viruses. 2023 Mar 30;15(4):888. doi: 10.3390/v15040888 (PMC10146814; doi:10.3390/v15040888)
Supplement: Supplementary file 1 [file viruses-15-00888-s001.zip › TableS1.xlsx]

## Sheet: Página1
Table S1. Quality of sequencing and assemblage of the genomes generated for this work.
Sample	GISAID ID	Linhagem	#Reads	#Bases	% genome reference	Coverage
SPBR00001	EPI_ISL_12041120	BA.1	445951	29843	99.80	1911
SPBR00002	EPI_ISL_12041121	BA.1	349088	29552	98.83	1487
SPBR00003	EPI_ISL_12041122	BA.1.9	468791	29843	99.80	2000
SPBR00004	EPI_ISL_12041123	BA.1	373976	29878	99.92	1589
SPBR00005	EPI_ISL_12041124	BA.1.9	525577	29879	99.92	2244
SPBR00006	EPI_ISL_12041125	BA.1.9	442664	29860	99.86	1881
SPBR00007	EPI_ISL_12041126	BA.1.9	422213	29688	99.28	1787
SPBR00008	EPI_ISL_12041127	BA.1	459144	29855	99.84	1952
SPBR00009	EPI_ISL_12041128	BA.1	506851	29888	99.95	2158
SPBR00010	EPI_ISL_12041129	BA.1.1	386876	29410	98.35	1638
SPBR00011	EPI_ISL_12041130	BA.1.9	528448	29894	99.97	2245
SPBR00012	EPI_ISL_12041131	BA.1	456080	29845	99.81	1938
SPBR00013	EPI_ISL_12041132	BA.1	320632	28951	96.82	1349
SPBR00014	EPI_ISL_12041133	BA.1	497687	29881	99.93	2116
SPBR00015	EPI_ISL_12041134	BA.1	459288	29880	99.92	1962
SPBR00016	EPI_ISL_12041135	B.1.1.529	472280	29898	99.98	2012
SPBR00017	EPI_ISL_12041136	BA.1	576304	29877	99.91	2451
SPBR00018	EPI_ISL_12041137	BA.1	546256	29885	99.94	2333
SPBR00019	EPI_ISL_12041138	BA.1.14	506044	29848	99.82	2157
SPBR00020	EPI_ISL_12041139	BA.1	540411	29888	99.95	2306
SPBR00021	EPI_ISL_12041140	BA.1.9	607907	29889	99.95	2611
SPBR00022	EPI_ISL_12041141	BA.1	579459	29892	99.96	2480
SPBR00023	EPI_ISL_12041142	BA.1.9	285360	28493	95.28	1206
SPBR00024	EPI_ISL_12041143	BA.1	600591	29891	99.96	2578
SPBR00025	EPI_ISL_12041144	BA.1	412612	29576	98.91	1741
SPBR00026	EPI_ISL_12041145	BA.1	498565	29868	99.88	2132
SPBR00027	EPI_ISL_12041146	BA.1.9	530509	29883	99.93	2262
SPBR00028	EPI_ISL_12041147	BA.1.1	475033	29855	99.84	2023
SPBR00029	EPI_ISL_12041148	BA.1	488019	29872	99.90	2088
SPBR00030	EPI_ISL_12041149	BA.1	468754	29874	99.90	1997
SPBR00031	EPI_ISL_12041150	BA.1	444828	29845	99.81	1898
SPBR00032	EPI_ISL_12041151	BA.1	456438	29871	99.89	1949
SPBR00033	EPI_ISL_12041152	BA.1	251492	28322	94.71	1051
SPBR00034	EPI_ISL_12041153	BA.1	501810	29892	99.96	2155
SPBR00035	EPI_ISL_12041154	BA.1	452492	29874	99.90	1930
SPBR00036	EPI_ISL_12041155	BA.1.9	549667	29885	99.94	2333
SPBR00037	EPI_ISL_12041156	BA.1	491449	29860	99.86	2095
SPBR00038	EPI_ISL_12041157	BA.1	444172	29881	99.93	1889
SPBR00039	EPI_ISL_12041158	BA.1	425504	29885	99.94	1824
SPBR00040	EPI_ISL_12041159	BA.1.14	503630	29865	99.87	2141
SPBR00041	EPI_ISL_12041160	BA.1	432347	29684	99.27	1833
SPBR00042	EPI_ISL_12041161	BA.1.1	351117	29642	99.13	1485
SPBR00043	EPI_ISL_12041162	BA.1.9	466154	29867	99.88	1984
SPBR00044	EPI_ISL_12041163	BA.1.9	410974	29861	99.86	1753
SPBR00045	EPI_ISL_12041164	BA.1.1	510254	29875	99.91	2182
SPBR00046	EPI_ISL_12041165	BA.1	553697	29882	99.93	2363
SPBR00047	EPI_ISL_12041166	BA.1	407263	29878	99.92	1738
SPBR00048	EPI_ISL_12041167	BA.1	495585	29870	99.89	2117
SPBR00049	EPI_ISL_12041168	BA.1.9	440373	29738	99.45	1867
SPBR00050	EPI_ISL_12041169	BA.1	563717	29866	99.88	2400
SPBR00051	EPI_ISL_12041170	BA.1	535352	29873	99.90	2286
SPBR00052	EPI_ISL_12041171	BA.1	564837	29883	99.93	2390
SPBR00053	EPI_ISL_12041172	BA.1	582914	29876	99.91	2481
SPBR00054	EPI_ISL_12041173	BA.1.9	437683	29874	99.90	1861
SPBR00055	EPI_ISL_12041174	BA.1	538479	29700	99.32	2280
SPBR00056	EPI_ISL_12041175	BA.1.14.1	498971	29884	99.94	2128
SPBR00057	EPI_ISL_12041176	BA.1	512863	29885	99.94	2177
SPBR00058	EPI_ISL_12041177	BA.1	410635	29844	99.80	1750
SPBR00059	EPI_ISL_12041178	BA.1.9	511971	29886	99.94	2187
SPBR00060	EPI_ISL_12041179	BA.1.9	447373	29885	99.94	1900
SPBR00061	EPI_ISL_12041180	BA.1	420392	29808	99.68	1782
SPBR00063	EPI_ISL_12041181	BA.1	513101	29878	99.92	2182
SPBR00065	EPI_ISL_12041182	BA.1.9	589782	29882	99.93	2509
SPBR00066	EPI_ISL_12041183	BA.1	445473	29852	99.83	1898
SPBR00067	EPI_ISL_12041184	BA.1.9	516518	29884	99.94	2195
SPBR00068	EPI_ISL_12041185	BA.1.9	399828	29502	98.66	1692
SPBR00070	EPI_ISL_12041186	BA.1	436404	29414	98.36	1844
SPBR00071	EPI_ISL_12041187	BA.1	549747	29880	99.92	2342
SPBR00072	EPI_ISL_12041188	BA.1	500093	29881	99.93	2131
SPBR00073	EPI_ISL_12041189	BA.1.1	446905	29844	99.80	1894
SPBR00074	EPI_ISL_12041190	BA.1.1	601513	29887	99.95	2555
SPBR00075	EPI_ISL_12041191	BA.1.1	388852	29836	99.78	1647
SPBR00076	EPI_ISL_12041192	BA.1	531393	29884	99.94	2268
SPBR00077	EPI_ISL_12041193	BA.1	514826	29872	99.90	2179
SPBR00078	EPI_ISL_12041194	BA.1	567671	29857	99.85	2407
SPBR00079	EPI_ISL_12041195	BA.1	483834	29848	99.82	2050
SPBR00080	EPI_ISL_12041196	BA.1	402797	29809	99.69	1704
SPBR00081	EPI_ISL_12041197	BA.1.21	426515	29866	99.88	1814
SPBR00082	EPI_ISL_12041198	BA.1	518900	29880	99.92	2202
SPBR00083	EPI_ISL_12041199	BA.1	433884	29877	99.91	1842
SPBR00084	EPI_ISL_12041200	BA.1.14.1	566762	29884	99.94	2412
SPBR00085	EPI_ISL_12041201	BA.1.1	457542	29331	98.09	1930
SPBR00086	EPI_ISL_12041202	BA.1.9	442374	29631	99.09	1881
SPBR00087	EPI_ISL_12041203	BA.1	349135	28779	96.24	1464
SPBR00088	EPI_ISL_12041204	BA.1	486377	29505	98.67	2064
SPBR00089	EPI_ISL_12041205	BA.1.1	508150	29871	99.89	2148
SPBR00090	EPI_ISL_12041206	BA.1	506814	29847	99.81	2136
SPBR00091	EPI_ISL_12041207	BA.1.1	616851	29889	99.95	2599
SPBR00092	EPI_ISL_12041208	BA.1.1	180800	29850	99.82	809
SPBR00093	EPI_ISL_12041209	BA.1.9	652934	29883	99.93	2771
SPBR00094	EPI_ISL_12041210	BA.1	559785	29885	99.94	2369
SPBR00095	EPI_ISL_12041211	BA.1	441384	29647	99.14	1858
SPBR00096	EPI_ISL_12041212	BA.1	421047	29885	99.94	1857
SPBR00097	EPI_ISL_12041213	BA.1	391461	29872	99.90	1720
SPBR00098	EPI_ISL_12041214	BA.1.15	404598	29884	99.94	1776
SPBR00099	EPI_ISL_12041215	BA.1	291831	29551	98.82	1280
SPBR00100	EPI_ISL_12041216	BA.1	414140	29884	99.94	1823
SPBR00101	EPI_ISL_12041217	BA.1	387354	29843	99.80	1707
SPBR00102	EPI_ISL_12041218	BA.1	454335	29847	99.81	1995
SPBR00103	EPI_ISL_12041219	BA.1	275076	29344	98.13	1202
SPBR00104	EPI_ISL_12041220	BA.1	415674	29877	99.91	1821
SPBR00105	EPI_ISL_12041221	BA.1.15	303719	29881	99.93	1331
SPBR00106	EPI_ISL_12041222	BA.1.1	345829	29877	99.91	1525
SPBR00107	EPI_ISL_12041223	BA.1	329837	29879	99.92	1455
SPBR00108	EPI_ISL_12041224	BA.1.1	431002	29849	99.82	1887
SPBR00109	EPI_ISL_12041225	BA.1.1	447337	29857	99.85	1960
SPBR00110	EPI_ISL_12041226	BA.1	513023	29886	99.94	2257
SPBR00111	EPI_ISL_12041227	BA.1	390636	29850	99.82	1715
SPBR00112	EPI_ISL_12041228	BA.1	493574	29885	99.94	2177
SPBR00113	EPI_ISL_12041229	BA.1	431319	29851	99.83	1891
SPBR00114	EPI_ISL_12041230	BA.1	488333	29715	99.37	2151
SPBR00115	EPI_ISL_12041231	BA.1	506278	29890	99.96	2230
SPBR00116	EPI_ISL_12041232	BA.1	336308	29875	99.91	1483
SPBR00117	EPI_ISL_12041233	BA.1	416198	29841	99.79	1846
SPBR00118	EPI_ISL_12041234	BA.1	424717	29845	99.81	1870
SPBR00119	EPI_ISL_12041235	BA.1	451281	29866	99.88	1992
SPBR00120	EPI_ISL_12041236	BA.1	387140	29765	99.54	1689
SPBR00121	EPI_ISL_12041237	BA.1	486135	29885	99.94	2148
SPBR00122	EPI_ISL_12041238	BA.1	443242	29848	99.82	1946
SPBR00123	EPI_ISL_12041239	BA.1	454429	29888	99.95	2001
SPBR00124	EPI_ISL_12041240	BA.1	462075	29888	99.95	2048
SPBR00125	EPI_ISL_12041241	BA.1	475473	29879	99.92	2094
SPBR00126	EPI_ISL_12041242	BA.1	441359	29882	99.93	1935
SPBR00127	EPI_ISL_12041243	BA.1	428471	29849	99.82	1882
SPBR00128	EPI_ISL_12041244	BA.1	447353	29882	99.93	1983
SPBR00129	EPI_ISL_12041245	BA.1	475697	29876	99.91	2099
SPBR00130	EPI_ISL_12041246	BA.1.1	321360	29726	99.41	1400
SPBR00131	EPI_ISL_12041247	BA.1	573680	29889	99.95	2531
SPBR00132	EPI_ISL_12041248	BA.1	429145	29884	99.94	1889
SPBR00133	EPI_ISL_12041249	BA.1	529183	29845	99.81	2330
SPBR00134	EPI_ISL_12041250	BA.1	457128	29875	99.91	2017
SPBR00135	EPI_ISL_12041251	BA.1	523239	29889	99.95	2307
SPBR00136	EPI_ISL_12041252	BA.1.21	276720	29032	97.09	1211
SPBR00137	EPI_ISL_12041253	BA.1	424717	29872	99.90	1869
SPBR00138	EPI_ISL_12041254	BA.1	526504	29884	99.94	2325
SPBR00139	EPI_ISL_12041255	BA.1.21	368300	29055	97.16	1598
SPBR00142	EPI_ISL_12041256	BA.1	420259	29879	99.92	1839
SPBR00143	EPI_ISL_12041257	BA.1	416155	29878	99.92	1824
SPBR00144	EPI_ISL_12041258	BA.1	565091	29894	99.97	2483
SPBR00145	EPI_ISL_12041259	BA.1	456241	29856	99.84	1997
SPBR00146	EPI_ISL_12041260	BA.1	379413	29846	99.81	1662
SPBR00147	EPI_ISL_12041261	BA.1.1	398644	29848	99.82	1748
SPBR00148	EPI_ISL_12041262	BA.1.1	322414	29613	99.03	1400
SPBR00149	EPI_ISL_12041263	BA.1.1	499379	29885	99.94	2191
SPBR00150	EPI_ISL_12041264	BA.1	393166	29695	99.30	1719
SPBR00151	EPI_ISL_12041265	BA.1	368780	29622	99.06	1611
SPBR00152	EPI_ISL_12041266	BA.1	575354	29884	99.94	2530
SPBR00153	EPI_ISL_12041267	BA.1	326890	28980	96.91	1417
SPBR00154	EPI_ISL_12041268	BA.1	451269	29848	99.82	1976
SPBR00155	EPI_ISL_12041269	BA.1.9	308671	29714	99.37	1344
SPBR00156	EPI_ISL_12041270	BA.1	408009	29830	99.76	1788
SPBR00157	EPI_ISL_12041271	BA.1.14	480228	29890	99.96	2110
SPBR00158	EPI_ISL_12041272	BA.1.1	477612	29889	99.95	2099
SPBR00159	EPI_ISL_12041273	BA.1.1	414390	29845	99.81	1814
SPBR00161	EPI_ISL_12041274	BA.1	478873	29884	99.94	2112
SPBR00162	EPI_ISL_12041275	BA.1	497089	29848	99.82	2184
SPBR00163	EPI_ISL_12041276	BA.1	160308	28212	94.34	696
SPBR00164	EPI_ISL_12041277	BA.1.8	510529	29870	99.89	2246
SPBR00165	EPI_ISL_12041278	BA.1.9	429760	29845	99.81	1884
SPBR00166	EPI_ISL_12041279	BA.1	461953	29888	99.95	2030
SPBR00167	EPI_ISL_12041280	BA.1	458040	29878	99.92	2002
SPBR00168	EPI_ISL_12041281	BA.1	515686	29884	99.94	2262
SPBR00169	EPI_ISL_12041282	BA.1.1	431251	29849	99.82	1880
SPBR00170	EPI_ISL_12041283	BA.1.9	471401	29889	99.95	2068
SPBR00171	EPI_ISL_12041284	BA.1.1	429685	29845	99.81	1884
SPBR00172	EPI_ISL_12041285	BA.1.15	559432	29887	99.95	2461
SPBR00173	EPI_ISL_12041286	BA.1	76927	29833	99.77	356
SPBR00174	EPI_ISL_12041287	BA.1	51151	27600	92.30	237
SPBR00175	EPI_ISL_12041288	BA.1.15	27394	29245	97.80	123
SPBR00176	EPI_ISL_12041289	BA.1.1	371907	29153	97.49	1617
SPBR00177	EPI_ISL_12041290	BA.1.15	327735	29879	99.92	1440
SPBR00178	EPI_ISL_12041291	BA.1	482101	29872	99.90	2107
SPBR00179	EPI_ISL_12041292	BA.1.1	504594	29879	99.92	2211
SPBR00180	EPI_ISL_12041293	BA.1.14	403737	29848	99.82	1762
SPBR00181	EPI_ISL_12041294	BA.1	417014	29847	99.81	1812
SPBR00182	EPI_ISL_12041295	BA.1	439048	29872	99.90	1921
SPBR00184	EPI_ISL_12041296	BA.1	523933	29872	99.90	2285
SPBR00185	EPI_ISL_12041297	BA.1	583446	29880	99.92	2559
SPBR00186	EPI_ISL_12041298	BA.1	568746	29878	99.92	2492
SPBR00187	EPI_ISL_12041299	BA.1.1	332259	29810	99.69	1446
SPBR00188	EPI_ISL_12041300	BA.1.1	502634	29884	99.94	2192
SPBR00189	EPI_ISL_12041301	BA.1.9	617126	29885	99.94	2716
SPBR00190	EPI_ISL_12041302	BA.1.9	584699	29886	99.94	2554
SPBR00192	EPI_ISL_12041303	BA.1	417533	29866	99.88	1839
SPBR00193	EPI_ISL_12041304	BA.1	430546	29876	99.91	1900
SPBR00194	EPI_ISL_12041305	BA.1.15	292139	29840	99.79	1283
SPBR00195	EPI_ISL_12041306	BA.1.9	321194	29829	99.75	1417
SPBR00196	EPI_ISL_12041307	BA.1.1	396693	29683	99.26	1735
SPBR00197	EPI_ISL_12041308	BA.1	233451	29290	97.95	1015
SPBR00198	EPI_ISL_12041309	BA.1	374531	29840	99.79	1655
SPBR00199	EPI_ISL_12041310	BA.1.9	327977	29842	99.80	1432
SPBR00200	EPI_ISL_12041311	BA.1	376219	29850	99.82	1652
SPBR00201	EPI_ISL_12041312	BA.1	377728	29878	99.92	1664
SPBR00202	EPI_ISL_12041313	BA.1.1	156974	28429	95.07	686
SPBR00203	EPI_ISL_12041314	BA.1	329852	29569	98.88	1443
SPBR00204	EPI_ISL_12041315	BA.1	400905	29882	99.93	1757
SPBR00205	EPI_ISL_12041316	BA.1	476458	29882	99.93	2109
SPBR00206	EPI_ISL_12041317	BA.1	408882	29887	99.95	1815
SPBR00207	EPI_ISL_12041318	BA.1	440709	29653	99.16	1937
SPBR00208	EPI_ISL_12041319	BA.1	264344	29831	99.76	1175
SPBR00209	EPI_ISL_12059880	BA.1	443149	29849	99.82	1954
SPBR00210	EPI_ISL_12059881	BA.1	534452	29886	99.94	2351
SPBR00211	EPI_ISL_12059882	BA.1	500810	29848	99.82	2196
SPBR00212	EPI_ISL_12059883	BA.1	443468	29887	99.95	1954
SPBR00213	EPI_ISL_12059884	BA.1	506769	29892	99.96	2234
SPBR00214	EPI_ISL_12059885	BA.1	412942	29836	99.78	1814
SPBR00215	EPI_ISL_12059886	BA.1	466164	29839	99.79	2042
SPBR00216	EPI_ISL_12059887	BA.1.14.1	496170	29883	99.93	2182
SPBR00217	EPI_ISL_12059888	BA.1	540756	29872	99.90	2381
SPBR00218	EPI_ISL_12059889	BA.1	327256	29349	98.15	1418
SPBR00219	EPI_ISL_12059890	BA.1	467173	29877	99.91	2059
SPBR00220	EPI_ISL_12059891	BA.1.9	173734	28094	93.95	758
SPBR00221	EPI_ISL_12059892	BA.1.15	443494	29855	99.84	1947
SPBR00222	EPI_ISL_12059893	BA.1	418172	29852	99.83	1829
SPBR00223	EPI_ISL_12059894	BA.1	451039	29869	99.89	1984
SPBR00224	EPI_ISL_12059895	BA.1.9	453255	29882	99.93	1994
SPBR00225	EPI_ISL_12059896	BA.1	489642	29868	99.88	2151
SPBR00226	EPI_ISL_12059897	BA.1.9	331052	29072	97.22	1448
SPBR00227	EPI_ISL_12059898	BA.1	436645	29843	99.80	1911
SPBR00228	EPI_ISL_12059899	BA.1	70924	29461	98.52	318
SPBR00229	EPI_ISL_12059900	BA.1.21	357240	29335	98.10	1556
SPBR00230	EPI_ISL_12059901	BA.1	378810	29845	99.81	1658
SPBR00231	EPI_ISL_12059902	BA.1	391931	29843	99.80	1712
SPBR00232	EPI_ISL_12059903	BA.1	307037	29652	99.16	1342
SPBR00233	EPI_ISL_12059904	BA.1	418142	29814	99.70	1831
SPBR00234	EPI_ISL_12059905	BA.1	475012	29891	99.96	2091
SPBR00235	EPI_ISL_12059906	BA.1	222478	29883	99.93	1003
SPBR00236	EPI_ISL_12059907	BA.1	522146	29872	99.90	2293
SPBR00237	EPI_ISL_12059908	BA.1	497039	29888	99.95	2198
SPBR00238	EPI_ISL_12059909	BA.1.1.1	433811	29847	99.81	1907
SPBR00239	EPI_ISL_12059910	BA.1	336497	29848	99.82	1477
SPBR00240	EPI_ISL_12059911	BA.1.15	521563	29879	99.92	2299
SPBR00241	EPI_ISL_12059912	BA.1	424566	29845	99.81	1862
SPBR00242	EPI_ISL_12059913	BA.1	440464	29880	99.92	1929
SPBR00243	EPI_ISL_12059914	BA.1	414181	29864	99.87	1817
SPBR00244	EPI_ISL_12059915	BA.1	524257	29880	99.92	2309
SPBR00245	EPI_ISL_12059916	BA.1	437166	29881	99.93	1925
SPBR00246	EPI_ISL_12059917	BA.1	487919	29892	99.96	2153
SPBR00247	EPI_ISL_12059918	BA.1	450198	29881	99.93	1984
SPBR00248	EPI_ISL_12059919	BA.1	399320	29878	99.92	1750
SPBR00249	EPI_ISL_12059920	BA.1	530913	29888	99.95	2344
SPBR00250	EPI_ISL_12059921	BA.1	297987	29846	99.81	1301
SPBR00251	EPI_ISL_12059922	BA.1	122576	29831	99.76	571
SPBR00252	EPI_ISL_12059923	BA.1	348226	29836	99.78	1522
SPBR00253	EPI_ISL_12059924	BA.1	412710	29884	99.94	1814
SPBR00254	EPI_ISL_12059925	BA.1.14.1	514524	29889	99.95	2259
SPBR00255	EPI_ISL_12059926	BA.1.14.1	466308	29847	99.81	2041
SPBR00256	EPI_ISL_12059927	BA.1	550170	29872	99.90	2417
SPBR00257	EPI_ISL_12059928	BA.1.1	441585	29793	99.63	1928
SPBR00258	EPI_ISL_12059929	BA.1.9	466220	29881	99.93	2041
SPBR00259	EPI_ISL_12059930	BA.1.1	600479	29893	99.97	2652
SPBR00260	EPI_ISL_12059931	BA.1	356803	29507	98.68	1557
SPBR00261	EPI_ISL_12059932	BA.1	507537	29844	99.80	2226
SPBR00262	EPI_ISL_12059933	BA.1.1	433983	29669	99.22	1899
SPBR00263	EPI_ISL_12059934	BA.1	499307	29890	99.96	2199
SPBR00264	EPI_ISL_12059935	BA.1.1	547819	29830	99.76	2404
SPBR00265	EPI_ISL_12059936	BA.1.1	340662	29412	98.36	1480
SPBR00266	EPI_ISL_12059937	BA.1.1	527099	29871	99.89	2303
SPBR00267	EPI_ISL_12059938	BA.1.14	226785	28273	94.55	975
SPBR00268	EPI_ISL_12059939	BA.1	515438	29883	99.93	2271
SPBR00269	EPI_ISL_12059940	BA.1.14.1	481462	29855	99.84	2119
SPBR00270	EPI_ISL_12059941	BA.1	247143	27693	92.61	1058
SPBR00271	EPI_ISL_12059942	BA.1.17	385520	29877	99.91	1709
SPBR00272	EPI_ISL_12059943	BA.1	538808	29882	99.93	2369
SPBR00273	EPI_ISL_12059944	BA.1.9	487213	29885	99.94	2141
SPBR00274	EPI_ISL_12059945	BA.1	400437	29850	99.82	1754
SPBR00275	EPI_ISL_12059946	BA.1	514230	29879	99.92	2257
SPBR00276	EPI_ISL_12059947	BA.1	489448	29865	99.87	2146
SPBR00277	EPI_ISL_12059948	BA.1	495145	29885	99.94	2172
SPBR00278	EPI_ISL_12059949	BA.1	364617	29706	99.34	1594
SPBR00279	EPI_ISL_12059950	BA.1	535213	29878	99.92	2353
SPBR00280	EPI_ISL_12059951	BA.1.9	247709	28197	94.29	1071
SPBR00281	EPI_ISL_12059952	BA.1.9	542955	29887	99.95	2387
SPBR00282	EPI_ISL_12059953	BA.1	439371	29666	99.21	1919
SPBR00283	EPI_ISL_12059954	BA.1.1	514062	29884	99.94	2254
SPBR00284	EPI_ISL_12059955	BA.1	510523	29882	99.93	2252
SPBR00285	EPI_ISL_12059956	BA.1.1	588427	29893	99.97	2583
SPBR00286	EPI_ISL_12059957	BA.1	723064	29883	99.93	3133
SPBR00298	EPI_ISL_12059958	BA.1	237816	28680	95.91	1010
SPBR00307	EPI_ISL_12059959	BA.1.1	292867	27813	93.01	1221
SPBR00337	EPI_ISL_12059960	BA.1.1.1	611458	29870	99.89	2629
SPBR00338	EPI_ISL_12059961	BA.1.1.1	644792	29887	99.95	2766
SPBR00339	EPI_ISL_12059962	BA.1.1	657016	29854	99.84	2827
SPBR00340	EPI_ISL_12059963	BA.1.1	633031	29879	99.92	2721
SPBR00341	EPI_ISL_12059964	BA.1.14.2	838534	29888	99.95	3624
SPBR00342	EPI_ISL_12059965	BA.1	709448	29888	99.95	3046
SPBR00343	EPI_ISL_12059966	BA.1.21	431284	29093	97.29	1835
SPBR00344	EPI_ISL_12059967	BA.1.1.1	691757	29879	99.92	2968
SPBR00345	EPI_ISL_12059968	BA.1.1	603237	29869	99.89	2582
SPBR00346	EPI_ISL_12059969	BA.1	702772	29883	99.93	3007
SPBR00347	EPI_ISL_12059970	BA.1	233172	29162	97.52	1002
SPBR00348	EPI_ISL_12059971	BA.1.1	667799	29830	99.76	2854
SPBR00349	EPI_ISL_12059972	BA.1.1	686067	29887	99.95	2961
SPBR00350	EPI_ISL_12059973	BA.1.1	739239	29891	99.96	3163
SPBR00351	EPI_ISL_12059974	BA.1	751985	29890	99.96	3236
SPBR00353	EPI_ISL_12059975	BA.1.1	692454	29886	99.94	2965
SPBR00354	EPI_ISL_12059976	BA.1	673289	29889	99.95	2890
SPBR00355	EPI_ISL_12059977	BA.1.1	572401	29876	99.91	2441
SPBR00356	EPI_ISL_12059978	BA.1.15	638470	29864	99.87	2734
SPBR00357	EPI_ISL_12059979	BA.1.14.1	684810	29882	99.93	2941
SPBR00358	EPI_ISL_12059980	BA.1.1	427523	29267	97.87	1809
SPBR00360	EPI_ISL_12059981	BA.1.1.1	425238	28646	95.80	1792
SPBR00361	EPI_ISL_12059982	BA.1.15	301401	29036	97.10	1288
SPBR00365	EPI_ISL_12059983	BA.1.1	406125	29465	98.54	1727
SPBR00368	EPI_ISL_12059984	BA.1.1	497582	29419	98.38	2115
SPBR00369	EPI_ISL_12059985	BA.1.1.1	500625	29609	99.02	2124
SPBR00370	EPI_ISL_12059986	BA.1.1.1	295962	28358	94.83	1240
SPBR00371	EPI_ISL_12059987	BA.1.1	431254	29191	97.62	1807
SPBR00372	EPI_ISL_12059988	BA.1.17.2	444455	28908	96.67	1852
SPBR00373	EPI_ISL_12059989	BA.1.1.1	431135	28427	95.06	1812
SPBR00376	EPI_ISL_12059990	BA.1.14.1	766859	29854	99.84	3286
SPBR00377	EPI_ISL_12059991	BA.1.1.1	733509	29793	99.63	3122
SPBR00378	EPI_ISL_12059992	BA.1.1.1	624252	29856	99.84	2670
PRBR00001	EPI_ISL_14319833	AY.101	368838	29633	99.10	1578
PRBR00002	EPI_ISL_14319834	AY.101	505206	29887	99.95	2171
PRBR00003	EPI_ISL_14319835	AY.43	487195	29854	99.84	2078
PRBR00004	EPI_ISL_14319836	AY.101	462535	29654	99.17	1964
PRBR00005	EPI_ISL_14319837	AY.101	444686	29887	99.95	1894
PRBR00006	EPI_ISL_14319838	AY.43	354917	29775	99.57	1499
PRBR00007	EPI_ISL_14319839	AY.43	412246	29671	99.22	1745
PRBR00008	EPI_ISL_14319840	AY.43	551255	29860	99.86	2353
PRBR00009	EPI_ISL_14319841	AY.101	86378	27915	93.35	390
PRBR00010	EPI_ISL_14319842	AY.43.2	535728	29887	99.95	2292
PRBR00011	EPI_ISL_14319843	AY.99.2	509774	29856	99.84	2164
PRBR00012	EPI_ISL_14319844	AY.122	448064	29855	99.84	1893
PRBR00013	EPI_ISL_14319845	AY.43	479922	29891	99.96	2063
PRBR00014	EPI_ISL_14319846	XC	390460	29805	99.67	1667
PRBR00015	EPI_ISL_14319847	AY.99.2	597180	29891	99.96	2563
PRBR00016	EPI_ISL_14319848	AY.99.2	548522	29896	99.98	2381
PRBR00017	EPI_ISL_14319849	AY.99.2	475378	29860	99.86	2053
PRBR00018	EPI_ISL_14319850	AY.43	421295	29854	99.84	1794
PRBR00019	EPI_ISL_14319851	AY.43	489908	29892	99.96	2088
PRBR00020	EPI_ISL_14319852	AY.101	361168	29826	99.74	1537
PRBR00021	EPI_ISL_14319853	BA.1.15	361809	29361	98.19	1536
PRBR00022	EPI_ISL_14319854	BA.1.5	563313	29874	99.90	2402
PRBR00023	EPI_ISL_14319855	BA.1.1	521633	29865	99.87	2216
PRBR00024	EPI_ISL_14319856	BA.1.1.14	513728	29844	99.80	2179
PRBR00025	EPI_ISL_14319857	BA.1	405783	29844	99.80	1741
PRBR00026	EPI_ISL_14319858	BA.1	438687	29853	99.83	1885
PRBR00027	EPI_ISL_14319859	BA.1.17	558926	29879	99.92	2412
PRBR00028	EPI_ISL_14319860	BA.1.15	505145	29849	99.82	2157
PRBR00029	EPI_ISL_14319861	BA.1	420577	29847	99.81	1802
PRBR00030	EPI_ISL_14319862	BA.1	446392	29850	99.82	1910
PRBR00031	EPI_ISL_14319863	BA.1	451272	29757	99.51	1928
PRBR00032	EPI_ISL_14319864	BA.1.1	451991	29836	99.78	1926
PRBR00033	EPI_ISL_14319865	BA.1.1	419134	29825	99.74	1773
PRBR00034	EPI_ISL_14319866	BA.1	221841	28773	96.22	927
PRBR00035	EPI_ISL_14319867	BA.1	590250	29891	99.96	2519
PRBR00036	EPI_ISL_14319868	BA.1.1	612934	29883	99.93	2613
PRBR00037	EPI_ISL_14319869	BA.1	443640	29886	99.94	1899
PRBR00038	EPI_ISL_14319870	BA.1.1	389168	29851	99.83	1662
PRBR00039	EPI_ISL_14319871	BA.1.1	403776	29267	97.87	1714
PRBR00040	EPI_ISL_14319872	BA.1.1	70490	27931	93.41	320
PRBR00041	EPI_ISL_14319873	BA.1	109251	29058	97.17	494
PRBR00042	EPI_ISL_14319874	BA.1.15	367930	29475	98.57	1563
PRBR00043	EPI_ISL_14319875	BA.1	514827	29859	99.85	2188
PRBR00044	EPI_ISL_14319876	BA.1.1	155414	29874	99.90	681
PRBR00045	EPI_ISL_14319877	BA.1.15	464008	29861	99.86	1973
PRBR00046	EPI_ISL_14319878	BA.1.1	524312	29875	99.91	2238
PRBR00047	EPI_ISL_14319879	BA.1	545413	29845	99.81	2322
PRBR00048	EPI_ISL_14319880	BA.1	516216	29859	99.85	2199
PRBR00049	EPI_ISL_14319881	BA.1.14.1	403620	29561	98.86	1719
PRBR00050	EPI_ISL_14319882	AY.43	481709	29861	99.86	2078
PRBR00051	EPI_ISL_14319883	AY.43	404103	29862	99.86	1728
PRBR00052	EPI_ISL_14319884	AY.101	330854	29857	99.85	1426
PRBR00053	EPI_ISL_14319885	AY.122	453803	29856	99.84	1948
PRBR00055	EPI_ISL_14319886	AY.101	548896	29851	99.83	2358
PRBR00056	EPI_ISL_14319887	BA.1.1	545241	29879	99.92	2335
PRBR00057	EPI_ISL_14319888	BA.1.15	468689	29849	99.82	2009
PRBR00058	EPI_ISL_14319889	BA.1.5	601656	29878	99.92	2568
PRBR00059	EPI_ISL_14319890	BA.1.17.2	599984	29857	99.85	2565
PRBR00060	EPI_ISL_14319891	BA.1	576023	29866	99.88	2459
PRBR00061	EPI_ISL_14319892	BA.1	471193	29881	99.93	2026
PRBR00062	EPI_ISL_14319893	BA.1.14.1	409230	29845	99.81	1750
PRBR00063	EPI_ISL_14319894	AY.101	454333	29857	99.85	1954
PRBR00064	EPI_ISL_14319895	BA.1	486677	29853	99.83	2090
PRBR00065	EPI_ISL_14319896	AY.101	510626	29859	99.85	2189
PRBR00066	EPI_ISL_14319897	BA.1.15	564441	29901	99.99	2425
PRBR00067	EPI_ISL_14319898	BA.1	494214	29881	99.93	2121
PRBR00068	EPI_ISL_14319899	BA.1.1	534486	29883	99.93	2308
PRBR00069	EPI_ISL_14319900	BA.1	535477	29888	99.95	2300
PRBR00070	EPI_ISL_14319901	BA.1.1	585047	29890	99.96	2502
PRBR00071	EPI_ISL_14319902	BA.1.15	397998	29844	99.80	1704
PRBR00072	EPI_ISL_14319903	BA.1	554763	29871	99.89	2374
PRBR00073	EPI_ISL_14319904	BA.1	438476	29891	99.96	1891
PRBR00074	EPI_ISL_14319905	AY.43	437213	29891	99.96	1891
PRBR00075	EPI_ISL_14319906	BA.1	563003	29896	99.98	2420
PRBR00076	EPI_ISL_14319907	BA.1.7	403732	29545	98.80	1726
PRBR00077	EPI_ISL_14319908	BA.1.15	475980	29876	99.91	2054
PRBR00078	EPI_ISL_14319909	BA.1	515682	29890	99.96	2214
PRBR00079	EPI_ISL_14319910	BA.1	586940	29850	99.82	2510
PRBR00080	EPI_ISL_14319911	BA.1.1	430315	29844	99.80	1833
PRBR00081	EPI_ISL_14319912	BA.1.1	535349	29862	99.86	2301
PRBR00082	EPI_ISL_14319913	BA.1.1.1	568457	29877	99.91	2432
PRBR00083	EPI_ISL_14319914	BA.1.15.1	564958	29855	99.84	2421
PRBR00084	EPI_ISL_14319915	BA.1.17	561624	29885	99.94	2403
PRBR00085	EPI_ISL_14319916	BA.1.14	434759	29843	99.80	1866
PRBR00086	EPI_ISL_14319917	BA.1	353511	29850	99.82	1514
PRBR00088	EPI_ISL_14319918	BA.1.17	504853	29890	99.96	2171
PRBR00089	EPI_ISL_14319919	BA.1.14.1	360447	29793	99.63	1545
PRBR00090	EPI_ISL_14319920	BA.1.1	600914	29887	99.95	2593
PRBR00091	EPI_ISL_14319921	BA.1.15	557135	29884	99.94	2401
PRBR00092	EPI_ISL_14319922	BA.1	591074	29874	99.90	2538
PRBR00093	EPI_ISL_14319923	BA.1	535952	29884	99.94	2305
PRBR00094	EPI_ISL_14319924	BA.1.1.14	484117	29854	99.84	2074
PRBR00095	EPI_ISL_14319925	BA.1.1	433371	29061	97.18	1854
PRBR00096	EPI_ISL_14319926	BA.1.1	349395	29876	99.91	1516
PRBR00097	EPI_ISL_14319927	BA.1.1	354992	29850	99.82	1530
PRBR00098	EPI_ISL_14319928	BA.1.14	350198	29843	99.80	1513
PRBR00099	EPI_ISL_14319929	BA.1	483211	29896	99.98	2082
PRBR00100	EPI_ISL_14319930	BA.1	435592	29879	99.92	1880
PRBR00101	EPI_ISL_14319931	BA.1	341434	29480	98.59	1462
PRBR00102	EPI_ISL_14319932	BA.1.15	538395	29866	99.88	2323
PRBR00103	EPI_ISL_14319933	BA.1	485012	29888	99.95	2083
PRBR00104	EPI_ISL_14319934	BA.1.19	441037	29875	99.91	1894
PRBR00105	EPI_ISL_14319935	BA.1.1	487930	29846	99.81	2103
PRBR00106	EPI_ISL_14319936	BA.1.14.1	541660	29872	99.90	2320
PRBR00107	EPI_ISL_14319937	BA.1	593320	29881	99.93	2542
PRBR00108	EPI_ISL_14319938	BA.1.14	391646	29877	99.91	1694
PRBR00109	EPI_ISL_14319939	BA.1	156042	29811	99.69	677
PRBR00112	EPI_ISL_14319940	BA.1	412638	29854	99.84	1779
PRBR00113	EPI_ISL_14319941	BA.1.1	398585	29876	99.91	1713
PRBR00114	EPI_ISL_14319942	BA.1.1	335503	29662	99.19	1444
PRBR00115	EPI_ISL_14319943	BA.1.7	358566	29843	99.80	1545
PRBR00116	EPI_ISL_14319944	BA.1.17	317908	29839	99.79	1388
PRBR00118	EPI_ISL_14319945	BA.1.14.1	240585	29883	99.93	1042
PRBR00119	EPI_ISL_14319946	BA.1.15	538796	29876	99.91	2326
PRBR00120	EPI_ISL_14319947	BA.1.1	314193	29848	99.82	1358
PRBR00121	EPI_ISL_14319948	BA.1.14.2	264005	29643	99.13	1142
PRBR00122	EPI_ISL_14319949	BA.1.1.14	216387	29297	97.97	937
PRBR00123	EPI_ISL_14319950	BA.1	228578	29622	99.06	991
PRBR00124	EPI_ISL_14319951	BA.1	389546	29839	99.79	1674
PRBR00125	EPI_ISL_14319952	BA.1.1	388101	29845	99.81	1679
PRBR00126	EPI_ISL_14319953	BA.1.1	214514	29475	98.57	925
PRBR00127	EPI_ISL_14319954	BA.1.14	277075	29572	98.89	1193
PRBR00128	EPI_ISL_14319955	BA.1.15	125436	27985	93.59	538
PRBR00129	EPI_ISL_14319956	BA.1	298460	29866	99.88	1287
PRBR00130	EPI_ISL_14319957	BA.1.7	233104	28678	95.90	993
PRBR00131	EPI_ISL_14319958	BA.1.1	474925	29870	99.89	2031
PRBR00132	EPI_ISL_14319959	BA.1	210358	29412	98.36	904
PRBR00133	EPI_ISL_14319960	BA.1	188422	29617	99.04	815
PRBR00134	EPI_ISL_14319961	BA.1.15	118777	28057	93.83	530
PRBR00135	EPI_ISL_14319962	BA.1.21	151630	29456	98.51	671
PRBR00136	EPI_ISL_14319963	BA.1	353858	29845	99.81	1526
PRBR00137	EPI_ISL_14319964	BA.1	462245	29742	99.46	1977
PRBR00138	EPI_ISL_14319965	BA.1	179052	28751	96.15	770
PRBR00139	EPI_ISL_14319966	BA.1.14.1	292182	29844	99.80	1262
PRBR00140	EPI_ISL_14319967	BA.1.1	117229	28544	95.46	502
PRBR00141	EPI_ISL_14319968	BA.1.1	177771	28950	96.81	764
PRBR00142	EPI_ISL_14319969	BA.1.1	235825	29420	98.38	1011
PRBR00143	EPI_ISL_14319970	BA.1	309588	29738	99.45	1325
PRBR00144	EPI_ISL_14319971	BA.1.15	222726	29622	99.06	957
PRBR00145	EPI_ISL_14319972	BA.1.1	266292	29849	99.82	1154
PRBR00146	EPI_ISL_14319973	BA.1.1	214208	29838	99.78	943
PRBR00147	EPI_ISL_14319974	BA.1.14	242316	29835	99.77	1051
PRBR00148	EPI_ISL_14319975	BA.1	499862	29859	99.85	2155
PRBR00149	EPI_ISL_14319976	BA.1.1	551741	29865	99.87	2373
PRBR00150	EPI_ISL_14319977	BA.1.1	445035	29891	99.96	1938
PRBR00151	EPI_ISL_14319978	BA.1.14.1	286364	29551	98.82	1232
PRBR00152	EPI_ISL_14319979	BA.1	391858	29865	99.87	1697
PRBR00153	EPI_ISL_14319980	BA.1.1.14	380828	29847	99.81	1641
PRBR00154	EPI_ISL_14319981	BA.1.15	440520	29890	99.96	1909
PRBR00155	EPI_ISL_14319982	BA.1.1	424332	29872	99.90	1819
PRBR00156	EPI_ISL_14319983	BA.1	191158	29076	97.23	828
PRBR00157	EPI_ISL_14319984	BA.1	457860	29881	99.93	1984
PRBR00158	EPI_ISL_14319985	BA.1.1	319268	29866	99.88	1390
PRBR00159	EPI_ISL_14319986	BA.1.17	435932	29883	99.93	1892
PRBR00160	EPI_ISL_14319987	BA.1.15	588986	29884	99.94	2548
PRBR00161	EPI_ISL_14319988	BA.1.1.14	443726	29846	99.81	1901
PRBR00162	EPI_ISL_14319989	BA.1.14	391919	29879	99.92	1692
PRBR00163	EPI_ISL_14319990	BA.1.1	325249	29868	99.88	1405
PRBR00164	EPI_ISL_14319991	BA.1	430160	29868	99.88	1857
PRBR00165	EPI_ISL_14319992	BA.1.1	283149	28904	96.66	1211
PRBR00166	EPI_ISL_14319993	BA.1.1	204643	29431	98.42	875
PRBR00167	EPI_ISL_14319994	BA.1.1	546795	29879	99.92	2349
PRBR00168	EPI_ISL_14319995	BA.1.1	443120	29871	99.89	1914
PRBR00169	EPI_ISL_14319996	BA.1	255380	29675	99.24	1101
PRBR00170	EPI_ISL_14319997	BA.1.1	355663	29852	99.83	1539
PRBR00171	EPI_ISL_14319998	BA.1.1	441300	29853	99.83	1897
PRBR00172	EPI_ISL_14319999	BA.1.1	570418	29885	99.94	2452
PRBR00173	EPI_ISL_14320000	BA.1	613173	29868	99.88	2624
PRBR00174	EPI_ISL_14320001	BA.1	583652	29884	99.94	2525
PRBR00175	EPI_ISL_14320002	BA.1.14	325025	29842	99.80	1410
PRBR00176	EPI_ISL_14320003	BA.1.1	543533	29883	99.93	2346
PRBR00177	EPI_ISL_14320004	BA.1.15	397629	29849	99.82	1715
PRBR00178	EPI_ISL_14320005	BA.1.1	151915	28909	96.68	648
PRBR00179	EPI_ISL_14320006	BA.1	487220	29847	99.81	2084
PRBR00180	EPI_ISL_14320007	BA.1	513732	29883	99.93	2218
PRBR00181	EPI_ISL_14320008	BA.1	495248	29883	99.93	2136
PRBR00182	EPI_ISL_14320009	BA.1.1	495072	29885	99.94	2132
PRBR00183	EPI_ISL_14320010	BA.1	468510	29881	99.93	2017
PRBR00184	EPI_ISL_14320011	BA.1.15	507984	29633	99.10	2176
PRBR00185	EPI_ISL_14320012	BA.1.1	614609	29879	99.92	2633
PRBR00186	EPI_ISL_14320013	BA.1	379921	29515	98.70	1642
PRBR00187	EPI_ISL_14320014	BA.1	343364	29808	99.68	1460
PRBR00188	EPI_ISL_14320015	BA.1.1	330669	29454	98.50	1413
PRBR00189	EPI_ISL_14320016	BA.1.1	615036	29851	99.83	2632
PRBR00190	EPI_ISL_14320017	BA.1.14	280811	29288	97.94	1194
PRBR00191	EPI_ISL_14320018	BA.1.17	461526	29856	99.84	2000
PRBR00192	EPI_ISL_14320019	BA.1.14	418372	29883	99.93	1803
PRBR00193	EPI_ISL_14320020	BA.1.14.1	575736	29849	99.82	2474
PRBR00195	EPI_ISL_14320021	BA.1.15	560321	29882	99.93	2420
PRBR00196	EPI_ISL_14320022	BA.1.1	482524	29846	99.81	2069
PRBR00197	EPI_ISL_14320023	BA.1.1	548298	29850	99.82	2361
PRBR00198	EPI_ISL_14320024	BA.1.1	525875	29882	99.93	2263
PRBR00199	EPI_ISL_14320025	BA.1.1	533664	29846	99.81	2283
PRBR00200	EPI_ISL_14320026	BA.1.1	476107	29882	99.93	2053
PRBR00201	EPI_ISL_14320027	BA.1.1.14	412946	29888	99.95	1794
PRBR00202	EPI_ISL_14320028	BA.1.1	571076	29876	99.91	2453
PRBR00203	EPI_ISL_14320029	BA.1	429344	29854	99.84	1855
PRBR00204	EPI_ISL_14320030	BA.1.1	434756	29876	99.91	1879
PRBR00205	EPI_ISL_14320031	BA.1	114422	29825	99.74	509
PRBR00206	EPI_ISL_14320032	BA.1.15	566555	29882	99.93	2434
PRBR00207	EPI_ISL_14320033	BA.1.15	543420	29887	99.95	2343
PRBR00208	EPI_ISL_14320034	BA.1.1	516874	29889	99.95	2228
PRBR00209	EPI_ISL_14320035	BA.1.15	528660	29852	99.83	2273
PRBR00210	EPI_ISL_14320036	BA.2	491605	29854	99.84	2110
PRBR00211	EPI_ISL_14320037	BA.1	579608	29872	99.90	2496
PRBR00212	EPI_ISL_14320038	BA.1	578620	29876	99.91	2488
PRBR00213	EPI_ISL_14320039	BA.1.1	615674	29889	99.95	2655
PRBR00214	EPI_ISL_14320040	BA.1.1	575250	29885	99.94	2484
PRBR00215	EPI_ISL_14320041	BA.1.1	432778	29679	99.25	1861
PRBR00216	EPI_ISL_14320042	BA.1	489073	29881	99.93	2112
PRBR00217	EPI_ISL_14320043	BA.1.14.1	564361	29898	99.98	2432
PRBR00218	EPI_ISL_14320044	BA.1.1	460637	29871	99.89	1991
PRBR00219	EPI_ISL_14320045	BA.1.14.1	496694	29881	99.93	2130
PRBR00220	EPI_ISL_14320046	BA.1.1	592169	29878	99.92	2544
PRBR00221	EPI_ISL_14320047	BA.1.1	566624	29872	99.90	2430
PRBR00222	EPI_ISL_14320048	BA.1.1	27815	28009	93.67	125
PRBR00223	EPI_ISL_14320049	BA.1	36470	29588	98.95	167
PRBR00224	EPI_ISL_14320050	BA.1.1	108250	29570	98.89	491
PRBR00225	EPI_ISL_14320051	BA.1	513240	29844	99.80	2207
PRBR00226	EPI_ISL_14320052	BA.1.1.14	102584	29834	99.77	465
PRBR00227	EPI_ISL_14320053	BA.1.1.14	423479	29850	99.82	1829
PRBR00228	EPI_ISL_14320054	BA.1.1	480616	29882	99.93	2069
PRBR00229	EPI_ISL_14320055	BA.1.1.14	500068	29868	99.88	2160
PRBR00230	EPI_ISL_14320056	BA.1.5	504698	29851	99.83	2173
PRBR00231	EPI_ISL_14320057	BA.1	505971	29874	99.90	2173
PRBR00232	EPI_ISL_14320058	BA.1.1.14	525807	29864	99.87	2261
PRBR00233	EPI_ISL_14320059	BA.1	528784	29881	99.93	2276
PRBR00234	EPI_ISL_14320060	BA.2	529446	29819	99.72	2274
PRBR00235	EPI_ISL_14320061	BA.1	82767	29858	99.85	381
PRBR00236	EPI_ISL_14320062	BA.1.1	582518	29886	99.94	2495
PRBR00237	EPI_ISL_14320063	BA.1.1	357111	29882	99.93	1546
PRBR00238	EPI_ISL_14320064	BA.1.1	604696	29865	99.87	2602
PRBR00239	EPI_ISL_14320065	BA.1	388477	29851	99.83	1689
PRBR00240	EPI_ISL_14320066	BA.1	512332	29892	99.96	2218
PRBR00241	EPI_ISL_14320067	BA.2	652907	29860	99.86	2811
PRBR00242	EPI_ISL_14320068	BA.1.14	485951	29843	99.80	2095
PRBR00243	EPI_ISL_14320069	BA.1	519878	29882	99.93	2245
PRBR00244	EPI_ISL_14320070	BA.1.1	527350	29845	99.81	2273
PRBR00245	EPI_ISL_14320071	BA.1	557345	29879	99.92	2405
PRBR00246	EPI_ISL_14320072	BA.1.1	564926	29884	99.94	2428
PRBR00247	EPI_ISL_14320073	BA.1.1	549849	29768	99.55	2363
PRBR00248	EPI_ISL_14320074	BA.1.1	34514	28691	95.95	161
PRBR00249	EPI_ISL_14320075	BA.1.1	541257	29867	99.88	2328
PRBR00250	EPI_ISL_14320076	BA.2	357669	29850	99.82	1534
PRBR00251	EPI_ISL_14320077	BA.1.1	510243	29880	99.92	2201
PRBR00252	EPI_ISL_14320078	BA.2	503437	29826	99.74	2175
PRBR00253	EPI_ISL_14320079	BA.1.14.2	515769	29883	99.93	2218
PRBR00254	EPI_ISL_14320080	BA.1.1	354189	29887	99.95	1529
PRBR00255	EPI_ISL_14320081	BA.1.1	540692	29888	99.95	2338
PRBR00256	EPI_ISL_14320082	BA.1.1	521742	29884	99.94	2246
PRBR00257	EPI_ISL_14320083	BA.1.1	536969	29882	99.93	2315
PRBR00258	EPI_ISL_14320084	BA.1	49631	29423	98.39	220
PRBR00259	EPI_ISL_14320085	BA.1.1	586067	29893	99.97	2533
PRBR00260	EPI_ISL_14320086	BA.1.14.1	26527	27666	92.52	116
PRBR00261	EPI_ISL_14320087	BA.1.1	297938	29876	99.91	1316
PRBR00262	EPI_ISL_14320088	BA.2	557379	29832	99.76	2412
PRBR00263	EPI_ISL_14320089	BA.1.1	454817	29855	99.84	1970
PRBR00264	EPI_ISL_14320090	BA.1.1.14	510657	29859	99.85	2209
PRBR00265	EPI_ISL_14320091	BA.1.1	433927	29871	99.89	1890
PRBR00266	EPI_ISL_14320092	BA.1.14.1	294702	29880	99.92	1286
PRBR00267	EPI_ISL_14320093	BA.1.1	437300	29849	99.82	1889
PRBR00268	EPI_ISL_14320094	BA.1.1	555433	28879	96.58	2391
PRBR00269	EPI_ISL_14320095	BA.1.1	535569	29888	99.95	2313
PRBR00270	EPI_ISL_14320096	BA.1.15	483526	29852	99.83	2076
PRBR00271	EPI_ISL_14320097	BA.1.1	601697	29855	99.84	2589
PRBR00272	EPI_ISL_14320098	BA.1.14.1	53106	29556	98.84	246
PRBR00273	EPI_ISL_14320099	BA.1.14.1	569877	29853	99.83	2442
PRBR00274	EPI_ISL_14320100	BA.1.1	559021	29852	99.83	2400
PRBR00275	EPI_ISL_14320101	BA.1.1	442716	29810	99.69	1930
PRBR00276	EPI_ISL_14320102	BA.2	452369	29847	99.81	1961
PRBR00277	EPI_ISL_14320103	BA.1.1	492254	29872	99.90	2122
PRBR00278	EPI_ISL_14320104	BA.1.1	519117	29884	99.94	2254
PRBR00279	EPI_ISL_14320105	BA.2	403819	29857	99.85	1754
PRBR00280	EPI_ISL_14320106	BA.2	477409	29850	99.82	2047
APBR50001	EPI_ISL_16030769	BA.1.1	328878	29845	99.81	1424
TOBR00071	EPI_ISL_16030770	AY.43	546083	29894	99.97	2370
TOBR00036	EPI_ISL_16030771	AY.99.2	534131	29892	99.96	2292
TOBR00030	EPI_ISL_16030772	AY.42	524140	29890	99.96	2262
TOBR00087	EPI_ISL_16030773	AY.99.2	524723	29875	99.91	2256
TOBR00012	EPI_ISL_16030774	AY.42	523343	29894	99.97	2249
TOBR00053	EPI_ISL_16030775	AY.43	507782	29899	99.99	2199
TOBR00089	EPI_ISL_16030776	AY.99.2	511260	29890	99.96	2197
TOBR00009	EPI_ISL_16030777	AY.99.2	502816	29891	99.96	2176
TOBR00033	EPI_ISL_16030778	AY.101	502845	29900	99.99	2173
TOBR00055	EPI_ISL_16030779	AY.43	504301	29900	99.99	2169
TOBR00069	EPI_ISL_16030780	AY.43	500187	29898	99.98	2153
TOBR00068	EPI_ISL_16030781	AY.43	498836	29897	99.98	2148
TOBR00013	EPI_ISL_16030782	AY.99.2	500505	29890	99.96	2144
TOBR00088	EPI_ISL_16030783	AY.99.2	496595	29896	99.98	2137
TOBR00016	EPI_ISL_16030784	AY.116	494502	29891	99.96	2120
TOBR00034	EPI_ISL_16030785	AY.99.2	491254	29858	99.85	2108
TOBR00072	EPI_ISL_16030786	AY.43	490157	29892	99.96	2107
TOBR00063	EPI_ISL_16030787	AY.43	483708	29890	99.96	2089
TOBR00058	EPI_ISL_16030788	AY.43	482234	29901	99.99	2086
TOBR00070	EPI_ISL_16030789	AY.43	484351	29893	99.97	2078
TOBR00065	EPI_ISL_16030790	AY.43	481818	29883	99.93	2072
TOBR00085	EPI_ISL_16030791	AY.101	479886	29894	99.97	2066
TOBR00005	EPI_ISL_16030792	AY.99.2	480174	29899	99.99	2058
TOBR00015	EPI_ISL_16030793	AY.99.2	477571	29897	99.98	2053
TOBR00026	EPI_ISL_16030794	AY.43	475612	29892	99.96	2044
TOBR00038	EPI_ISL_16030795	AY.42	475278	29883	99.93	2041
TOBR00024	EPI_ISL_16030796	AY.43	475825	29865	99.87	2041
TOBR00046	EPI_ISL_16030797	AY.99.2	473977	29867	99.88	2035
TOBR00083	EPI_ISL_16030798	AY.99.2	474558	29854	99.84	2035
TOBR00056	EPI_ISL_16030799	AY.99.2	470885	29896	99.98	2020
TOBR00007	EPI_ISL_16030800	AY.43	468681	29894	99.97	2015
TOBR00075	EPI_ISL_16030801	AY.43	468397	29890	99.96	2010
TOBR00094	EPI_ISL_16030802	AY.99.2	464997	29862	99.86	2001
TOBR00006	EPI_ISL_16030803	AY.99.2	465203	29898	99.98	1998
TOBR00022	EPI_ISL_16030804	AY.124.1	463633	29888	99.95	1995
TOBR00021	EPI_ISL_16030805	AY.99.2	461951	29891	99.96	1985
TOBR00011	EPI_ISL_16030806	AY.99.2	459013	29894	99.97	1984
TOBR00051	EPI_ISL_16030807	AY.99.2	460453	29895	99.97	1982
TOBR00073	EPI_ISL_16030808	AY.43	458066	29894	99.97	1970
TOBR00059	EPI_ISL_16030809	AY.43	456463	29900	99.99	1967
TOBR00064	EPI_ISL_16030810	AY.43	451581	29896	99.98	1954
TOBR00017	EPI_ISL_16030811	AY.43	452021	29864	99.87	1940
TOBR00081	EPI_ISL_16030812	AY.43	451824	29893	99.97	1931
TOBR00032	EPI_ISL_16030813	AY.101	442942	29888	99.95	1905
TOBR00047	EPI_ISL_16030814	AY.43	443708	29861	99.86	1904
TOBR00027	EPI_ISL_16030815	AY.43	439618	29902	100.00	1900
TOBR00020	EPI_ISL_16030816	AY.46.3	437327	29892	99.96	1895
TOBR00067	EPI_ISL_16030817	AY.43	433918	29861	99.86	1866
TOBR00050	EPI_ISL_16030818	AY.99.2	422631	29892	99.96	1830
TOBR00060	EPI_ISL_16030819	AY.43	417294	29894	99.97	1797
TOBR00061	EPI_ISL_16030820	AY.43	416388	29856	99.84	1789
TOBR00062	EPI_ISL_16030821	AY.43	414637	29897	99.98	1788
TOBR00079	EPI_ISL_16030822	AY.99.2	414917	29858	99.85	1780
TOBR00004	EPI_ISL_16030823	AY.99.2	412546	29899	99.99	1775
TOBR00010	EPI_ISL_16030824	AY.99.2	404689	29894	99.97	1741
TOBR00031	EPI_ISL_16030825	AY.101	399353	29901	99.99	1723
TOBR00049	EPI_ISL_16030826	AY.43	398055	29894	99.97	1718
TOBR00074	EPI_ISL_16030827	AY.43	385894	29859	99.85	1662
TOBR00090	EPI_ISL_16030828	AY.99.2	385420	29890	99.96	1659
TOBR00066	EPI_ISL_16030829	AY.43	346904	29881	99.93	1488
TOBR00008	EPI_ISL_16030830	AY.43	308327	29885	99.94	1334
PEBR50003	EPI_ISL_16030831	AY.99.2	484462	29856	99.84	2049
PBBR50007	EPI_ISL_16030832	AY.99.2	508253	29879	99.92	2165
PABR50055	EPI_ISL_16030833	AY.99.2	613873	29895	99.97	2594
PABR50053	EPI_ISL_16030834	AY.99.2	606203	29900	99.99	2586
PABR50040	EPI_ISL_16030835	AY.99.2	548494	29855	99.84	2318
PABR50039	EPI_ISL_16030836	AY.99.2	467199	29888	99.95	1976
PABR50038	EPI_ISL_16030837	AY.43	709912	29902	100.00	3076
PABR50017	EPI_ISL_16030838	AY.101	503864	29899	99.99	2138
MGBR50448	EPI_ISL_16030839	AY.99.2	523094	29898	99.98	2217
MGBR50409	EPI_ISL_16030840	AY.99.2	386934	29855	99.84	1666
MGBR50408	EPI_ISL_16030841	AY.99.2	431915	29895	99.97	1836
MGBR50336	EPI_ISL_16030842	AY.6	454536	29901	99.99	1936
MGBR50293	EPI_ISL_16030843	AY.101	519088	29901	99.99	2200
MGBR50054	EPI_ISL_16030844	AY.99.2	474846	29901	99.99	2046
MGBR50053	EPI_ISL_16030845	AY.99.2	372039	29873	99.90	1611
MGBR50051	EPI_ISL_16030846	AY.99.2	395264	29891	99.96	1703
MGBR50050	EPI_ISL_16030847	AY.6	414855	29892	99.96	1789
MGBR50049	EPI_ISL_16030848	AY.99.2	382020	29856	99.84	1652
MGBR50048	EPI_ISL_16030849	AY.43.7	502449	29898	99.98	2115
MGBR50047	EPI_ISL_16030850	AY.99.2	525508	29859	99.85	2212
MGBR50046	EPI_ISL_16030851	AY.43.1	526690	29898	99.98	2228
MGBR50044	EPI_ISL_16030852	AY.99.2	564925	29896	99.98	2385
MGBR50043	EPI_ISL_16030853	AY.6	551097	29893	99.97	2322
MGBR50041	EPI_ISL_16030854	AY.99.2	470225	29891	99.96	1994
MGBR50040	EPI_ISL_16030855	AY.6	451470	29860	99.86	1908
MGBR50039	EPI_ISL_16030856	AY.6	520320	29901	99.99	2205
MGBR50038	EPI_ISL_16030857	AY.99.2	571678	29897	99.98	2419
MGBR50037	EPI_ISL_16030858	AY.46.3	432321	29856	99.84	1829
MGBR50034	EPI_ISL_16030859	AY.99.2	395887	29898	99.98	1683
GOBR50031	EPI_ISL_16030860	AY.99.2	248513	29814	99.70	1067
GOBR50001	EPI_ISL_16030861	AY.99.2	453370	29891	99.96	1938
ESBR50003	EPI_ISL_16030862	AY.99.1	453709	29901	99.99	1987
BABR50019	EPI_ISL_16030863	AY.99.2	569266	29890	99.96	2400
BABR50010	EPI_ISL_16030864	AY.99.2	421452	29884	99.94	1818
BABR50009	EPI_ISL_16030865	AY.99.2	433780	29892	99.96	1865
BABR50007	EPI_ISL_16030866	AY.99.2	526027	29895	99.97	2221
APBR50005	EPI_ISL_16030867	AY.43	529789	29876	99.91	2235
APBR50004	EPI_ISL_16030868	AY.99.2	493648	29898	99.98	2088
MGBR50031	EPI_ISL_16030869	AY.99.2	489397	29890	99.96	2087
GOBR50018	EPI_ISL_16030870	AY.42	406179	29840	99.79	1746
MGBR50055	EPI_ISL_16030871	AY.43.1	454423	29857	99.85	1953
MGBR50052	EPI_ISL_16030872	AY.43.1	381073	29880	99.92	1644
AC-LNCC-00374	EPI_ISL_16030873	BA.1.1	415433	29846	99.81	1740
AC-LNCC-00337	EPI_ISL_16030874	BA.1.1	416083	29880	99.92	1754
CEBR50034	EPI_ISL_16030875	BA.1.1	352074	29878	99.92	1505
LNN08961	EPI_ISL_16030876	BA.1	587294	29880	99.92	2515
AC-LNCC-00369	EPI_ISL_16030877	BA.1	498453	29845	99.81	2087
AC-LNCC-00358	EPI_ISL_16030878	BA.1.1	411038	29845	99.81	1734
AC-LNCC-00342	EPI_ISL_16030879	BA.1.1	356224	29847	99.81	1501
AC-LNCC-00334	EPI_ISL_16030880	BA.1.14	392815	29866	99.88	1655
AC-LNCC-00329	EPI_ISL_16030881	BA.1.1	418927	29843	99.80	1759
AC-LNCC-00318	EPI_ISL_16030882	BA.1.9	407226	29844	99.80	1720
AC-LNCC-00308	EPI_ISL_16030883	BA.1.1	435338	29873	99.90	1836
AC-LNCC-00286	EPI_ISL_16030884	BA.1.1	416381	29848	99.82	1766
AC-LNCC-00280	EPI_ISL_16030885	BA.1.1	518286	29881	99.93	2206
AC-LNCC-00212	EPI_ISL_16030886	BA.1.1	352562	29843	99.80	1491
MGBR50402	EPI_ISL_16030887	BA.1	417594	29868	99.88	1802
SPBR50152	EPI_ISL_16030888	BA.1	485983	29881	99.93	2089
PEBR50002	EPI_ISL_16030889	BA.1	455594	29853	99.83	1960
MGBR50525	EPI_ISL_16030890	BA.1.1	501579	29847	99.81	2157
MGBR50527	EPI_ISL_16030891	BA.1	384094	29861	99.86	1663
PABR50016	EPI_ISL_16030892	BA.1.14.1	526695	29878	99.92	2267
MGBR50343	EPI_ISL_16030893	BA.2	470990	29857	99.85	2017
CEBR50020	EPI_ISL_16030894	AY.99.2	598526	29825	99.74	2537
MGBR50339	EPI_ISL_16030895	BA.1.15	438236	29874	99.90	1903
SPBR50014	EPI_ISL_16030896	BA.1.15	460771	29848	99.82	1991
CEBR50010	EPI_ISL_16030897	BA.1	564203	29888	99.95	2435
TOBR00019	EPI_ISL_16030898	AY.34	218639	29597	98.98	941
TOBR00025	EPI_ISL_16030899	AY.34	513730	29897	99.98	2207
TOBR00028	EPI_ISL_16030900	AY.34	509300	29888	99.95	2194
TOBR00014	EPI_ISL_16030901	AY.34	492470	29893	99.97	2114
TOBR00048	EPI_ISL_16030902	AY.34	450458	29888	99.95	1933
TOBR00076	EPI_ISL_16030903	AY.34	442032	29857	99.85	1901
TOBR00002	EPI_ISL_16030904	AY.34	426859	29884	99.94	1829
TOBR00029	EPI_ISL_16030905	AY.34	421980	29857	99.85	1810
PRBR50015	EPI_ISL_16030906	BA.1.1	190017	29873	99.90	825
TOBR00003	EPI_ISL_16030907	AY.34	345953	29855	99.84	1483
MGBR50495	EPI_ISL_16030908	BA.1.15	371529	29846	99.81	1606
TOBR00078	EPI_ISL_16030909	P.1.7	341920	29865	99.87	1469
MGBR50045	EPI_ISL_16030910	AY.99.2	467050	29883	99.93	1964
AC-LNCC-00262	EPI_ISL_16030911	BA.1.1	465800	29886	99.94	1984
LNN08949	EPI_ISL_16030912	BA.1.1	515860	29884	99.94	2212
LNN08932	EPI_ISL_16030913	BA.1.1	548134	29858	99.85	2351
AC-LNCC-00389	EPI_ISL_16030914	BA.1.1	524353	29880	99.92	2195
AC-LNCC-00388	EPI_ISL_16030915	BA.1.1	586159	29873	99.90	2452
AC-LNCC-00387	EPI_ISL_16030916	BA.1.1	444262	29877	99.91	1860
AC-LNCC-00385	EPI_ISL_16030917	BA.1.1	578224	29847	99.81	2402
AC-LNCC-00384	EPI_ISL_16030918	BA.1.1	588919	29880	99.92	2481
AC-LNCC-00383	EPI_ISL_16030919	BA.1.1	579816	29847	99.81	2416
AC-LNCC-00382	EPI_ISL_16030920	BA.1.1	512368	29847	99.81	2148
AC-LNCC-00379	EPI_ISL_16030921	BA.1.1	514859	29851	99.83	2156
AC-LNCC-00378	EPI_ISL_16030922	BA.1.14.1	530993	29868	99.88	2222
AC-LNCC-00377	EPI_ISL_16030923	BA.1.1	506639	29879	99.92	2118
AC-LNCC-00376	EPI_ISL_16030924	BA.1.1	439719	29844	99.80	1832
AC-LNCC-00375	EPI_ISL_16030925	BA.1.1	579798	29855	99.84	2429
AC-LNCC-00373	EPI_ISL_16030926	BA.1.1	433239	29844	99.80	1815
AC-LNCC-00372	EPI_ISL_16030927	BA.1.1	562399	29880	99.92	2367
AC-LNCC-00371	EPI_ISL_16030928	BA.1.1	494243	29882	99.93	2068
AC-LNCC-00370	EPI_ISL_16030929	BA.1.1.1	373249	29882	99.93	1579
AC-LNCC-00366	EPI_ISL_16030930	BA.1.1	499135	29871	99.89	2097
AC-LNCC-00365	EPI_ISL_16030931	BA.1.1	453048	29884	99.94	1901
AC-LNCC-00364	EPI_ISL_16030932	BA.1.14.1	367083	29843	99.80	1514
AC-LNCC-00362	EPI_ISL_16030933	BA.1.14.1	495949	29851	99.83	2078
AC-LNCC-00361	EPI_ISL_16030934	BA.1.1	554524	29845	99.81	2331
AC-LNCC-00355	EPI_ISL_16030935	BA.1.1	483494	29842	99.80	2035
AC-LNCC-00354	EPI_ISL_16030936	BA.1.1	530147	29879	99.92	2244
AC-LNCC-00353	EPI_ISL_16030937	BA.1	395716	29854	99.84	1666
AC-LNCC-00351	EPI_ISL_16030938	BA.1.1	557584	29883	99.93	2346
AC-LNCC-00350	EPI_ISL_16030939	BA.1.1	443475	29886	99.94	1872
AC-LNCC-00349	EPI_ISL_16030940	BA.1.1	455971	29845	99.81	1925
AC-LNCC-00348	EPI_ISL_16030941	BA.1.1	448594	29882	99.93	1901
AC-LNCC-00346	EPI_ISL_16030942	BA.1.1	443804	29845	99.81	1871
AC-LNCC-00345	EPI_ISL_16030943	BA.1	485438	29884	99.94	2071
AC-LNCC-00344	EPI_ISL_16030944	BA.1.1	460764	29877	99.91	1944
AC-LNCC-00343	EPI_ISL_16030945	BA.1.1	496779	29884	99.94	2103
AC-LNCC-00341	EPI_ISL_16030946	BA.1.1	393983	29878	99.92	1668
AC-LNCC-00340	EPI_ISL_16030947	BA.1	525699	29892	99.96	2240
AC-LNCC-00338	EPI_ISL_16030948	BA.1.1	493178	29860	99.86	2075
AC-LNCC-00336	EPI_ISL_16030949	BA.1.1	499238	29849	99.82	2103
AC-LNCC-00335	EPI_ISL_16030950	BA.1.1	467505	29880	99.92	1967
AC-LNCC-00333	EPI_ISL_16030951	BA.1.1	405091	29884	99.94	1700
AC-LNCC-00331	EPI_ISL_16030952	BA.1.1	440283	29848	99.82	1855
AC-LNCC-00330	EPI_ISL_16030953	BA.1.1	457590	29846	99.81	1932
AC-LNCC-00328	EPI_ISL_16030954	BA.1.1	379086	29858	99.85	1598
AC-LNCC-00327	EPI_ISL_16030955	BA.1.1	470580	29847	99.81	1984
AC-LNCC-00326	EPI_ISL_16030956	BA.1.1	400711	29887	99.95	1683
AC-LNCC-00325	EPI_ISL_16030957	BA.1.1	442721	29844	99.80	1865
AC-LNCC-00324	EPI_ISL_16030958	BA.1.1	530415	29877	99.91	2231
AC-LNCC-00323	EPI_ISL_16030959	BA.1.1	506697	29876	99.91	2130
AC-LNCC-00321	EPI_ISL_16030960	BA.1.1	414126	29854	99.84	1741
AC-LNCC-00320	EPI_ISL_16030961	BA.1.1	435136	29873	99.90	1827
AC-LNCC-00319	EPI_ISL_16030962	BA.1.1	482779	29893	99.97	2039
AC-LNCC-00317	EPI_ISL_16030963	BA.1.1	396049	29850	99.82	1672
AC-LNCC-00316	EPI_ISL_16030964	BA.1.1	492117	29880	99.92	2074
AC-LNCC-00315	EPI_ISL_16030965	BA.1.1	390918	29845	99.81	1649
AC-LNCC-00314	EPI_ISL_16030966	BA.1.1	437324	29874	99.90	1844
AC-LNCC-00312	EPI_ISL_16030967	BA.1.14.1	441078	29844	99.80	1862
AC-LNCC-00309	EPI_ISL_16030968	BA.1.1	434624	29866	99.88	1841
AC-LNCC-00307	EPI_ISL_16030969	BA.1.1	434092	29882	99.93	1833
AC-LNCC-00306	EPI_ISL_16030970	BA.1.1	406840	29851	99.83	1718
AC-LNCC-00305	EPI_ISL_16030971	BA.1.1	460240	29862	99.86	1949
AC-LNCC-00304	EPI_ISL_16030972	BA.1.1	426081	29882	99.93	1800
AC-LNCC-00303	EPI_ISL_16030973	BA.1.1	385278	29845	99.81	1625
AC-LNCC-00302	EPI_ISL_16030974	BA.1.1	466891	29866	99.88	1984
AC-LNCC-00301	EPI_ISL_16030975	BA.1.1	368714	29865	99.87	1557
AC-LNCC-00300	EPI_ISL_16030976	BA.1.1	454401	29845	99.81	1929
AC-LNCC-00299	EPI_ISL_16030977	BA.1.1	399837	29848	99.82	1690
AC-LNCC-00298	EPI_ISL_16030978	BA.1.17.2	435409	29889	99.95	1845
AC-LNCC-00297	EPI_ISL_16030979	BA.1.1	403086	29879	99.92	1710
AC-LNCC-00294	EPI_ISL_16030980	BA.1.1	536121	29887	99.95	2304
AC-LNCC-00293	EPI_ISL_16030981	BA.1.1	530504	29886	99.94	2265
AC-LNCC-00292	EPI_ISL_16030982	BA.1.1	498772	29892	99.96	2131
AC-LNCC-00291	EPI_ISL_16030983	BA.1.1	493707	29848	99.82	2111
AC-LNCC-00290	EPI_ISL_16030984	BA.1.1	514773	29872	99.90	2187
AC-LNCC-00289	EPI_ISL_16030985	BA.1.1	491518	29869	99.89	2089
AC-LNCC-00288	EPI_ISL_16030986	BA.1.1	515312	29866	99.88	2193
AC-LNCC-00287	EPI_ISL_16030987	BA.1.1	490271	29880	99.92	2086
AC-LNCC-00285	EPI_ISL_16030988	BA.1.1	466436	29848	99.82	1976
AC-LNCC-00284	EPI_ISL_16030989	BA.1.1	488959	29864	99.87	2075
AC-LNCC-00283	EPI_ISL_16030990	BA.1.14	476782	29866	99.88	2024
AC-LNCC-00282	EPI_ISL_16030991	BA.1.1	495736	29883	99.93	2106
AC-LNCC-00281	EPI_ISL_16030992	BA.1.1	475661	29869	99.89	2023
AC-LNCC-00279	EPI_ISL_16030993	BA.1.1	380355	29847	99.81	1631
AC-LNCC-00278	EPI_ISL_16030994	BA.1.1	524479	29887	99.95	2233
AC-LNCC-00277	EPI_ISL_16030995	BA.1.17.2	519667	29871	99.89	2209
AC-LNCC-00276	EPI_ISL_16030996	BA.1.1	478802	29885	99.94	2043
AC-LNCC-00274	EPI_ISL_16030997	BA.1.1	556177	29884	99.94	2359
AC-LNCC-00273	EPI_ISL_16030998	BA.1.1	460764	29845	99.81	1949
AC-LNCC-00272	EPI_ISL_16030999	BA.1.1	532774	29852	99.83	2277
AC-LNCC-00271	EPI_ISL_16031000	BA.1.1	455271	29869	99.89	1935
AC-LNCC-00270	EPI_ISL_16031001	BA.1.1	421919	29893	99.97	1810
AC-LNCC-00269	EPI_ISL_16031002	BA.1.1	524837	29879	99.92	2242
AC-LNCC-00268	EPI_ISL_16031003	BA.1.1	554045	29888	99.95	2377
AC-LNCC-00267	EPI_ISL_16031004	BA.1.1	506747	29862	99.86	2154
AC-LNCC-00266	EPI_ISL_16031005	BA.1.1	476781	29854	99.84	2022
AC-LNCC-00265	EPI_ISL_16031006	BA.1.1	493929	29888	99.95	2110
AC-LNCC-00264	EPI_ISL_16031007	BA.1.1	503892	29873	99.90	2161
AC-LNCC-00263	EPI_ISL_16031008	BA.1.1	459926	29881	99.93	1955
AC-LNCC-00261	EPI_ISL_16031009	BA.1.14.1	399286	29877	99.91	1700
AC-LNCC-00260	EPI_ISL_16031010	BA.1.17.2	428860	29879	99.92	1819
AC-LNCC-00259	EPI_ISL_16031011	BA.1.1	455760	29874	99.90	1940
AC-LNCC-00258	EPI_ISL_16031012	BA.1.1	346416	29878	99.92	1473
AC-LNCC-00256	EPI_ISL_16031013	BA.1.1	401143	29887	99.95	1706
AC-LNCC-00255	EPI_ISL_16031014	BA.1.1	495758	29883	99.93	2109
AC-LNCC-00254	EPI_ISL_16031015	BA.1.1	454449	29865	99.87	1946
AC-LNCC-00253	EPI_ISL_16031016	BA.1.1	483448	29867	99.88	2057
AC-LNCC-00252	EPI_ISL_16031017	BA.1.1	527088	29882	99.93	2237
AC-LNCC-00251	EPI_ISL_16031018	BA.1.1	391316	29884	99.94	1674
AC-LNCC-00250	EPI_ISL_16031019	BA.1.1	420027	29875	99.91	1779
AC-LNCC-00249	EPI_ISL_16031020	BA.1.1	432860	29878	99.92	1845
AC-LNCC-00248	EPI_ISL_16031021	BA.1.1	480884	29892	99.96	2046
AC-LNCC-00247	EPI_ISL_16031022	BA.1.1	545951	29885	99.94	2331
AC-LNCC-00246	EPI_ISL_16031023	BA.1	457060	29852	99.83	1940
AC-LNCC-00245	EPI_ISL_16031024	BA.1.1	542664	29889	99.95	2313
AC-LNCC-00244	EPI_ISL_16031025	BA.1.1	551290	29851	99.83	2349
AC-LNCC-00243	EPI_ISL_16031026	BA.1.1	579125	29854	99.84	2471
AC-LNCC-00242	EPI_ISL_16031027	BA.1.1	504951	29882	99.93	2137
AC-LNCC-00241	EPI_ISL_16031028	BA.1.1	537478	29870	99.89	2277
AC-LNCC-00240	EPI_ISL_16031029	BA.1.1	507271	29872	99.90	2161
AC-LNCC-00239	EPI_ISL_16031030	BA.1.1	670911	29875	99.91	2864
AC-LNCC-00238	EPI_ISL_16031031	BA.1.13	504528	29887	99.95	2154
AC-LNCC-00237	EPI_ISL_16031032	BA.1.1	495641	29850	99.82	2107
AC-LNCC-00236	EPI_ISL_16031033	BA.1.1	555808	29890	99.96	2374
AC-LNCC-00235	EPI_ISL_16031034	BA.1.1	484091	29881	99.93	2064
AC-LNCC-00234	EPI_ISL_16031035	BA.1.1	520797	29895	99.97	2224
AC-LNCC-00233	EPI_ISL_16031036	BA.1.1	346377	29845	99.81	1465
AC-LNCC-00232	EPI_ISL_16031037	BA.1.1	571703	29845	99.81	2455
AC-LNCC-00231	EPI_ISL_16031038	BA.1.1	574839	29884	99.94	2446
AC-LNCC-00230	EPI_ISL_16031039	BA.1.14.1	478847	29886	99.94	2047
AC-LNCC-00229	EPI_ISL_16031040	BA.1.17.2	549802	29875	99.91	2347
AC-LNCC-00228	EPI_ISL_16031041	BA.1.1	470923	29848	99.82	1997
AC-LNCC-00227	EPI_ISL_16031042	BA.1.1	482260	29889	99.95	2051
AC-LNCC-00226	EPI_ISL_16031043	BA.1.1	425393	29862	99.86	1801
AC-LNCC-00225	EPI_ISL_16031044	BA.1.1	599965	29888	99.95	2557
AC-LNCC-00224	EPI_ISL_16031045	BA.1.1	539474	29888	99.95	2286
AC-LNCC-00223	EPI_ISL_16031046	BA.1.1	631153	29881	99.93	2680
AC-LNCC-00222	EPI_ISL_16031047	BA.1.1	482441	29885	99.94	2059
AC-LNCC-00221	EPI_ISL_16031048	BA.1.1	501669	29854	99.84	2128
AC-LNCC-00220	EPI_ISL_16031049	BA.1.1	509927	29883	99.93	2165
AC-LNCC-00219	EPI_ISL_16031050	BA.1.1	550328	29870	99.89	2342
AC-LNCC-00218	EPI_ISL_16031051	BA.1.1	479844	29851	99.83	2033
AC-LNCC-00217	EPI_ISL_16031052	BA.1.1	426370	29844	99.80	1810
AC-LNCC-00216	EPI_ISL_16031053	BA.1.1	511340	29848	99.82	2181
AC-LNCC-00215	EPI_ISL_16031054	BA.1.1	586997	29886	99.94	2498
AC-LNCC-00214	EPI_ISL_16031055	BA.1.1	353088	29851	99.83	1505
AC-LNCC-00213	EPI_ISL_16031056	BA.1.15	461085	29846	99.81	1950
AC-LNCC-00211	EPI_ISL_16031057	BA.1.1	464018	29846	99.81	1967
AC-LNCC-00210	EPI_ISL_16031058	BA.1.1	388797	29865	99.87	1659
AC-LNCC-00209	EPI_ISL_16031059	BA.1.1	446558	29849	99.82	1887
AC-LNCC-00208	EPI_ISL_16031060	BA.1	479404	29877	99.91	2030
AC-LNCC-00207	EPI_ISL_16031061	BA.1.1	416444	29878	99.92	1748
AC-LNCC-00206	EPI_ISL_16031062	BA.1.1	380768	29884	99.94	1616
AC-LNCC-00205	EPI_ISL_16031063	BA.1	368844	29848	99.82	1570
AC-LNCC-00204	EPI_ISL_16031064	BA.1	540941	29874	99.90	2303
AC-LNCC-00203	EPI_ISL_16031065	BA.1.1	383563	29846	99.81	1631
AC-LNCC-00201	EPI_ISL_16031066	BA.1.1	424291	29863	99.87	1792
AC-LNCC-00200	EPI_ISL_16031067	BA.1.1	469994	29889	99.95	2000
RJBR50051	EPI_ISL_16031068	BA.1.14	469523	29845	99.81	2023
RJBR50050	EPI_ISL_16031069	BA.1.14.1	422305	29866	99.88	1824
RJBR50048	EPI_ISL_16031070	BA.1.1	464944	29896	99.98	1994
RJBR50047	EPI_ISL_16031071	BA.1.14.1	516939	29855	99.84	2220
RJBR50041	EPI_ISL_16031072	BA.1.1	431287	29890	99.96	1844
RJBR50040	EPI_ISL_16031073	BA.1	499659	29876	99.91	2126
RJBR50039	EPI_ISL_16031074	BA.1	272770	29876	99.91	1173
RJBR50038	EPI_ISL_16031075	BA.1	495558	29847	99.81	2120
RJBR50037	EPI_ISL_16031076	BA.1	415563	29890	99.96	1792
RJBR50026	EPI_ISL_16031077	BA.1	466841	29867	99.88	2023
RJBR50025	EPI_ISL_16031078	BA.1.1	463164	29885	99.94	1969
RJBR50024	EPI_ISL_16031079	BA.1	469947	29885	99.94	1989
RJBR50023	EPI_ISL_16031080	BA.1.14	571669	29885	99.94	2428
RJBR50022	EPI_ISL_16031081	BA.1	479830	29877	99.91	2052
RJBR50021	EPI_ISL_16031082	BA.1	431271	29882	99.93	1843
RJBR50020	EPI_ISL_16031083	BA.1	429349	29850	99.82	1839
RJBR50015	EPI_ISL_16031084	BA.1	555806	29854	99.84	2403
RJBR50014	EPI_ISL_16031085	BA.1	566236	29885	99.94	2446
RJBR50010	EPI_ISL_16031086	BA.1	494650	29869	99.89	2109
RJBR50009	EPI_ISL_16031087	BA.1.15	529760	29883	99.93	2284
RJBR50008	EPI_ISL_16031088	BA.1.1	434698	29886	99.94	1883
RJBR50004	EPI_ISL_16031089	BA.1	550394	29880	99.92	2339
PIBR50003	EPI_ISL_16031090	BA.1.1	454489	29884	99.94	1937
PIBR50002	EPI_ISL_16031091	BA.1	446653	29853	99.83	1895
PBBR50019	EPI_ISL_16031092	BA.1	364810	29877	99.91	1550
PBBR50017	EPI_ISL_16031093	BA.1.14.2	491428	29868	99.88	2077
PBBR50016	EPI_ISL_16031094	BA.1.1	479915	29890	99.96	2031
PBBR50015	EPI_ISL_16031095	BA.1.14.1	431014	29847	99.81	1838
PBBR50014	EPI_ISL_16031096	BA.1.14.1	436663	29882	99.93	1860
PABR50021	EPI_ISL_16031097	BA.1.14.1	647975	29895	99.97	2803
PABR50020	EPI_ISL_16031098	BA.1	477804	29886	99.94	2076
PABR50019	EPI_ISL_16031099	BA.1.14.1	466936	29847	99.81	2019
MTBR50003	EPI_ISL_16031100	BA.1.1	457512	29868	99.88	1981
MGBR50548	EPI_ISL_16031101	BA.1	494192	29864	99.87	2133
MGBR50547	EPI_ISL_16031102	BA.1	514503	29851	99.83	2182
MGBR50546	EPI_ISL_16031103	BA.1	441262	29860	99.86	1902
MGBR50528	EPI_ISL_16031104	BA.1.15	402190	29883	99.93	1741
MGBR50523	EPI_ISL_16031105	BA.1.1	428347	29879	99.92	1846
MGBR50521	EPI_ISL_16031106	BA.1	547630	29884	99.94	2339
MGBR50520	EPI_ISL_16031107	BA.1.1.1	534754	29892	99.96	2296
MGBR50519	EPI_ISL_16031108	BA.1.1.1	342252	29891	99.96	1458
MGBR50516	EPI_ISL_16031109	BA.1.14	477015	29868	99.88	2053
MGBR50512	EPI_ISL_16031110	BA.1.1.1	422844	29874	99.90	1835
MGBR50511	EPI_ISL_16031111	BA.1	424570	29887	99.95	1833
MGBR50510	EPI_ISL_16031112	BA.1.1	412038	29878	99.92	1776
MGBR50509	EPI_ISL_16031113	BA.1	410536	29853	99.83	1783
MGBR50508	EPI_ISL_16031114	BA.1	450920	29881	99.93	1955
MGBR50502	EPI_ISL_16031115	BA.1.1	508476	29887	99.95	2200
MGBR50496	EPI_ISL_16031116	BA.1.14.1	429592	29880	99.92	1854
MGBR50493	EPI_ISL_16031117	BA.1.1.14	497390	29881	99.93	2103
MGBR50486	EPI_ISL_16031118	BA.1	494637	29848	99.82	2130
MGBR50485	EPI_ISL_16031119	BA.1	460997	29860	99.86	1990
MGBR50475	EPI_ISL_16031120	BA.1	385835	29871	99.89	1667
MGBR50471	EPI_ISL_16031121	BA.1.1	438599	29889	99.95	1880
MGBR50470	EPI_ISL_16031122	BA.1.1	390872	29883	99.93	1697
MGBR50469	EPI_ISL_16031123	BA.1.14.1	480061	29853	99.83	2054
MGBR50467	EPI_ISL_16031124	BA.1	488917	29871	99.89	2083
MGBR50465	EPI_ISL_16031125	BA.1	426172	29865	99.87	1838
MGBR50444	EPI_ISL_16031126	BA.1.15	483674	29884	99.94	2072
MGBR50441	EPI_ISL_16031127	BA.1.1	425024	29868	99.88	1831
MGBR50438	EPI_ISL_16031128	BA.1	500388	29886	99.94	2148
MGBR50410	EPI_ISL_16031129	BA.1.17.2	354348	29857	99.85	1518
MGBR50389	EPI_ISL_16031130	BA.1	433144	29858	99.85	1873
MGBR50388	EPI_ISL_16031131	BA.1	457418	29886	99.94	1975
MGBR50383	EPI_ISL_16031132	BA.1	497743	29887	99.95	2107
MGBR50377	EPI_ISL_16031133	BA.1	474743	29872	99.90	2047
MGBR50352	EPI_ISL_16031134	BA.1	450818	29879	99.92	1946
MGBR50349	EPI_ISL_16031135	BA.1	523691	29870	99.89	2264
MGBR50348	EPI_ISL_16031136	BA.1.1.1	470911	29847	99.81	2033
MGBR50346	EPI_ISL_16031137	BA.1	489558	29879	99.92	2077
MGBR50345	EPI_ISL_16031138	BA.1	265687	29864	99.87	1139
MGBR50344	EPI_ISL_16031139	BA.1	533742	29890	99.96	2279
MGBR50342	EPI_ISL_16031140	BA.1	479178	29862	99.86	2052
MGBR50341	EPI_ISL_16031141	BA.1.14.2	486107	29872	99.90	2099
MGBR50340	EPI_ISL_16031142	BA.1.15	471844	29881	99.93	2026
MGBR50335	EPI_ISL_16031143	BA.1.14.2	506775	29892	99.96	2155
MGBR50333	EPI_ISL_16031144	BA.1.14.1	472678	29880	99.92	2005
MGBR50325	EPI_ISL_16031145	BA.1.15	425308	29882	99.93	1822
MGBR50314	EPI_ISL_16031146	BA.1.14.1	525032	29879	99.92	2249
MGBR50313	EPI_ISL_16031147	BA.1	365730	29858	99.85	1564
MGBR50297	EPI_ISL_16031148	BA.1	566809	29879	99.92	2440
MGBR50296	EPI_ISL_16031149	BA.1.14	480204	29847	99.81	2068
MGBR50295	EPI_ISL_16031150	BA.1.1	484818	29872	99.90	2069
MGBR50294	EPI_ISL_16031151	BA.1	443372	29864	99.87	1899
MGBR50129	EPI_ISL_16031152	BA.1	515977	29874	99.90	2232
MGBR50128	EPI_ISL_16031153	BA.1.1	587609	29888	99.95	2547
MGBR50127	EPI_ISL_16031154	BA.1	565023	29849	99.82	2434
MGBR50126	EPI_ISL_16031155	BA.1	548711	29891	99.96	2362
MGBR50125	EPI_ISL_16031156	BA.1	460473	29869	99.89	1982
MGBR50124	EPI_ISL_16031157	BA.1	487494	29874	99.90	2108
MGBR50123	EPI_ISL_16031158	BA.1.1.1	574221	29865	99.87	2468
MGBR50122	EPI_ISL_16031159	BA.1	541411	29863	99.87	2331
MGBR50121	EPI_ISL_16031160	BA.1	522453	29892	99.96	2254
MGBR50120	EPI_ISL_16031161	BA.1.15	540055	29889	99.95	2332
MGBR50119	EPI_ISL_16031162	BA.1	495592	29880	99.92	2140
MGBR50117	EPI_ISL_16031163	BA.1.1	542611	29848	99.82	2340
MGBR50116	EPI_ISL_16031164	BA.1.14.1	543233	29871	99.89	2358
MGBR50115	EPI_ISL_16031165	BA.1.14.1	462948	29889	99.95	1997
MGBR50114	EPI_ISL_16031166	BA.1	459342	29871	99.89	1985
MGBR50113	EPI_ISL_16031167	BA.1.1	502987	29894	99.97	2182
MGBR50111	EPI_ISL_16031168	BA.1.14.1	475683	29889	99.95	2064
MGBR50110	EPI_ISL_16031169	BA.1	383445	29878	99.92	1657
MGBR50109	EPI_ISL_16031170	BA.1.14.1	330352	29840	99.79	1428
MGBR50108	EPI_ISL_16031171	BA.1.15	429103	29847	99.81	1853
MGBR50107	EPI_ISL_16031172	BA.1	506749	29889	99.95	2199
MGBR50106	EPI_ISL_16031173	BA.1	498054	29883	99.93	2157
MGBR50104	EPI_ISL_16031174	BA.1.14.2	368540	29882	99.93	1595
MGBR50103	EPI_ISL_16031175	BA.1	502477	29885	99.94	2176
MGBR50102	EPI_ISL_16031176	BA.1.1.14	444733	29883	99.93	1924
MGBR50101	EPI_ISL_16031177	BA.1.1	557860	29883	99.93	2408
MGBR50100	EPI_ISL_16031178	BA.1	418198	29856	99.84	1815
MGBR50099	EPI_ISL_16031179	BA.1	463240	29842	99.80	2009
MGBR50098	EPI_ISL_16031180	BA.1	386950	29846	99.81	1672
MGBR50095	EPI_ISL_16031181	BA.1.1.1	520945	29850	99.82	2205
MGBR50094	EPI_ISL_16031182	BA.1	490570	29889	99.95	2079
MGBR50093	EPI_ISL_16031183	BA.1.14.1	523803	29846	99.81	2224
MGBR50089	EPI_ISL_16031184	BA.1	516118	29869	99.89	2197
MGBR50088	EPI_ISL_16031185	BA.1	464977	29849	99.82	1968
MGBR50085	EPI_ISL_16031186	BA.1.17.2	468639	29871	99.89	1999
MGBR50084	EPI_ISL_16031187	BA.1.1	475868	29873	99.90	2025
MGBR50083	EPI_ISL_16031188	BA.1.1	502769	29880	99.92	2140
MGBR50082	EPI_ISL_16031189	BA.1	496742	29872	99.90	2112
MGBR50081	EPI_ISL_16031190	BA.1	467952	29843	99.80	1995
MGBR50080	EPI_ISL_16031191	BA.1.14.1	461579	29869	99.89	1970
MGBR50079	EPI_ISL_16031192	BA.1	534535	29889	99.95	2285
MGBR50078	EPI_ISL_16031193	BA.1	454978	29854	99.84	1943
MGBR50075	EPI_ISL_16031194	BA.1.1	523432	29878	99.92	2235
MGBR50074	EPI_ISL_16031195	BA.1	461935	29875	99.91	1965
MGBR50073	EPI_ISL_16031196	BA.1	509502	29884	99.94	2181
MGBR50072	EPI_ISL_16031197	BA.1	454251	29883	99.93	1933
MGBR50071	EPI_ISL_16031198	BA.1	480045	29886	99.94	2047
MGBR50070	EPI_ISL_16031199	BA.1	490730	29886	99.94	2088
MGBR50069	EPI_ISL_16031200	BA.1	505850	29890	99.96	2157
MGBR50068	EPI_ISL_16031201	BA.1	472688	29882	99.93	2025
MGBR50067	EPI_ISL_16031202	BA.1.1	527802	29878	99.92	2249
MGBR50066	EPI_ISL_16031203	BA.1	536584	29884	99.94	2301
MGBR50065	EPI_ISL_16031204	BA.1.15	467807	29880	99.92	2006
MGBR50064	EPI_ISL_16031205	BA.1.14.1	457937	29848	99.82	1973
MGBR50063	EPI_ISL_16031206	BA.1.1	477017	29865	99.87	2054
MGBR50062	EPI_ISL_16031207	BA.1	486748	29871	99.89	2087
MGBR50061	EPI_ISL_16031208	BA.1	562114	29893	99.97	2415
MGBR50060	EPI_ISL_16031209	BA.1	469541	29863	99.87	2016
MGBR50058	EPI_ISL_16031210	BA.1	435977	29888	99.95	1887
MGBR50057	EPI_ISL_16031211	BA.1	496975	29890	99.96	2144
MGBR50056	EPI_ISL_16031212	BA.1	490317	29890	99.96	2111
MGBR50030	EPI_ISL_16031213	BA.1.1	452557	29866	99.88	1918
MGBR50025	EPI_ISL_16031214	BA.1.14	483070	29879	99.92	2046
MGBR50024	EPI_ISL_16031215	BA.1	566981	29880	99.92	2402
MGBR50022	EPI_ISL_16031216	BA.1.1.16	517543	29884	99.94	2192
MGBR50021	EPI_ISL_16031217	BA.1.17.2	489318	29641	99.12	2076
MGBR50019	EPI_ISL_16031218	BA.1	491341	29883	99.93	2082
MGBR50018	EPI_ISL_16031219	BA.1.14	443077	29880	99.92	1881
MGBR50017	EPI_ISL_16031220	BA.1	432441	29876	99.91	1831
MGBR50016	EPI_ISL_16031221	BA.1.14.2	489848	29881	99.93	2096
MGBR50014	EPI_ISL_16031222	BA.1.1.1	441777	29865	99.87	1875
GOBR50028	EPI_ISL_16031223	BA.1.14.1	454478	29882	99.93	1953
GOBR50027	EPI_ISL_16031224	BA.1.14.1	493307	29876	99.91	2118
GOBR50022	EPI_ISL_16031225	BA.1.14.1	612857	29892	99.96	2601
GOBR50021	EPI_ISL_16031226	BA.1.14.1	548290	29888	99.95	2332
GOBR50020	EPI_ISL_16031227	BA.1.14.1	457068	29885	99.94	1965
GOBR50019	EPI_ISL_16031228	BA.1.20	497335	29877	99.91	2127
GOBR50012	EPI_ISL_16031229	BA.1.14	497955	29882	99.93	2147
GOBR50011	EPI_ISL_16031230	BA.1.15	403089	29877	99.91	1716
ESBR50008	EPI_ISL_16031231	BA.1.14	76657	29846	99.81	359
CEBR50042	EPI_ISL_16031232	BA.1.1	507644	29889	99.95	2167
CEBR50041	EPI_ISL_16031233	BA.1	515437	29859	99.85	2209
CEBR50040	EPI_ISL_16031234	BA.1	476065	29872	99.90	2029
CEBR50039	EPI_ISL_16031235	BA.1	470244	29848	99.82	2002
CEBR50038	EPI_ISL_16031236	BA.1.1	462662	29853	99.83	1968
CEBR50036	EPI_ISL_16031237	BA.1	357375	29844	99.80	1528
CEBR50035	EPI_ISL_16031238	BA.1	570754	29878	99.92	2443
CEBR50032	EPI_ISL_16031239	BA.1	546798	29889	99.95	2336
CEBR50031	EPI_ISL_16031240	BA.1	460624	29888	99.95	1972
CEBR50030	EPI_ISL_16031241	BA.1	480210	29890	99.96	2066
CEBR50029	EPI_ISL_16031242	BA.1	419274	29879	99.92	1800
CEBR50028	EPI_ISL_16031243	BA.1	504172	29885	99.94	2165
CEBR50027	EPI_ISL_16031244	BA.1	469675	29854	99.84	2014
CEBR50026	EPI_ISL_16031245	BA.1	514884	29885	99.94	2235
CEBR50025	EPI_ISL_16031246	BA.1.1	461558	29847	99.81	1987
CEBR50024	EPI_ISL_16031247	BA.1	494157	29890	99.96	2126
CEBR50023	EPI_ISL_16031248	BA.1	473307	29862	99.86	2042
CEBR50022	EPI_ISL_16031249	BA.1.1	494685	29891	99.96	2131
CEBR50021	EPI_ISL_16031250	BA.1	465347	29869	99.89	2003
CEBR50019	EPI_ISL_16031251	BA.1	401764	29881	99.93	1705
BABR50021	EPI_ISL_16031252	BA.1.14.2	439671	29880	99.92	1860
APBR50006	EPI_ISL_16031253	BA.1	528325	29886	99.94	2252
AMBR50001	EPI_ISL_16031254	BA.1.1	519014	29867	99.88	2214
TOBR50009	EPI_ISL_16031255	BA.1.1	477636	29888	99.95	2069
TOBR50008	EPI_ISL_16031256	BA.1.17.2	466434	29880	99.92	2015
TOBR50007	EPI_ISL_16031257	BA.1.14.1	505825	29887	99.95	2188
TOBR50006	EPI_ISL_16031258	BA.1.14.1	443296	29761	99.53	1910
TOBR50001	EPI_ISL_16031259	BA.1.14.1	448754	29890	99.96	1949
SPBR50154	EPI_ISL_16031260	BA.1.13	442059	29845	99.81	1898
SPBR50153	EPI_ISL_16031261	BA.1.14	497678	29865	99.87	2138
SPBR50151	EPI_ISL_16031262	BA.1	413863	29880	99.92	1807
SPBR50150	EPI_ISL_16031263	BA.1	590791	29870	99.89	2543
SPBR50149	EPI_ISL_16031264	BA.1	464096	29882	99.93	2012
SPBR50147	EPI_ISL_16031265	BA.1.1	570933	29883	99.93	2457
SPBR50146	EPI_ISL_16031266	BA.1.1	451260	29884	99.94	1949
SPBR50080	EPI_ISL_16031267	BA.1	560853	29885	99.94	2413
SPBR50079	EPI_ISL_16031268	BA.1	619745	29880	99.92	2672
SPBR50078	EPI_ISL_16031269	BA.1	522222	29888	99.95	2250
SPBR50077	EPI_ISL_16031270	BA.1	528534	29893	99.97	2290
SPBR50076	EPI_ISL_16031271	BA.1.14	469842	29845	99.81	2015
SPBR50075	EPI_ISL_16031272	BA.1.15	511162	29891	99.96	2207
SPBR50074	EPI_ISL_16031273	BA.1.14.2	481937	29848	99.82	2070
SPBR50073	EPI_ISL_16031274	BA.1	239291	29880	99.92	1076
SPBR50071	EPI_ISL_16031275	BA.1.15	476095	29867	99.88	2059
SPBR50044	EPI_ISL_16031276	BA.1.7	550907	29879	99.92	2365
SPBR50042	EPI_ISL_16031277	BA.1	592454	29890	99.96	2544
SPBR50041	EPI_ISL_16031278	BA.1	484800	29883	99.93	2084
SPBR50037	EPI_ISL_16031279	BA.1.1	398720	29884	99.94	1730
SPBR50035	EPI_ISL_16031280	BA.1	444406	29889	99.95	1902
SPBR50029	EPI_ISL_16031281	BA.1	585756	29881	99.93	2521
SPBR50028	EPI_ISL_16031282	BA.1.14.2	715745	29892	99.96	3132
SPBR50027	EPI_ISL_16031283	BA.1.1	498180	29886	99.94	2148
SPBR50024	EPI_ISL_16031284	BA.1.15	511641	29857	99.85	2198
SPBR50023	EPI_ISL_16031285	BA.1.14	503811	29879	99.92	2167
SPBR50015	EPI_ISL_16031286	BA.1.1	540358	29885	99.94	2331
SPBR50013	EPI_ISL_16031287	BA.1	606948	29880	99.92	2607
SEBR50002	EPI_ISL_16031288	BA.1.1	497445	29870	99.89	2146
SCBR50003	EPI_ISL_16031289	BA.1	346182	29864	99.87	1508
SCBR50002	EPI_ISL_16031290	BA.1	514971	29879	99.92	2216
SCBR50001	EPI_ISL_16031291	BA.1	396027	29887	99.95	1712
RSBR50005	EPI_ISL_16031292	BA.1.17.2	473258	29879	99.92	2038
RRBR50001	EPI_ISL_16031293	BA.1.14.1	531686	29881	99.93	2290
ROBR50020	EPI_ISL_16031294	BA.1.1.1	463626	29882	99.93	2000
ROBR50019	EPI_ISL_16031295	BA.1.14.1	470856	29874	99.90	2031
ROBR50018	EPI_ISL_16031296	BA.1.1.1	435092	29879	99.92	1881
ROBR50006	EPI_ISL_16031297	BA.1.1	623192	29887	99.95	2676
ROBR50004	EPI_ISL_16031298	BA.1.1	498371	29846	99.81	2148
ROBR50003	EPI_ISL_16031299	BA.1.1	513015	29882	99.93	2208
RNBR50001	EPI_ISL_16031300	BA.1.1	471471	29893	99.97	2036
RJBR50058	EPI_ISL_16031301	BA.1.1	594850	29883	99.93	2562
RJBR50057	EPI_ISL_16031302	BA.1	499125	29885	99.94	2152
RJBR50056	EPI_ISL_16031303	BA.1.14.1	466333	29881	99.93	2017
RJBR50055	EPI_ISL_16031304	BA.1.1	453952	29881	99.93	1962
RJBR50019	EPI_ISL_16031305	BA.1	500995	29879	99.92	2151
RJBR50018	EPI_ISL_16031306	BA.1.1	400069	29884	99.94	1729
RJBR50003	EPI_ISL_16031307	BA.1.1	325582	29859	99.85	1398
RJBR50002	EPI_ISL_16031308	BA.1	438827	29883	99.93	1893
PRBR50010	EPI_ISL_16031309	BA.1.1	505858	29849	99.82	2177
PRBR50007	EPI_ISL_16031310	BA.1.1.1	521340	29880	99.92	2235
PRBR50006	EPI_ISL_16031311	BA.1.1.14	380309	29844	99.80	1634
PRBR50004	EPI_ISL_16031312	BA.1.20	457302	29846	99.81	1954
PRBR50003	EPI_ISL_16031313	BA.1.1	469220	29881	99.93	2010
PRBR00111	EPI_ISL_16031314	BA.1.14	270856	29871	99.89	1176
PRBR00087	EPI_ISL_16031315	BA.1.21	238327	29591	98.96	1026
PIBR50001	EPI_ISL_16031316	BA.1.14.1	523545	29849	99.82	2245
PEBR50001	EPI_ISL_16031317	BA.1	341084	29849	99.82	1474
PBBR50012	EPI_ISL_16031318	BA.1.18	523461	29893	99.97	2270
PBBR50010	EPI_ISL_16031319	BA.1	413053	29852	99.83	1789
PBBR50006	EPI_ISL_16031320	BA.1.1	490750	29875	99.91	2116
PBBR50005	EPI_ISL_16031321	BA.1	469867	29874	99.90	2024
PBBR50004	EPI_ISL_16031322	BA.1	507594	29888	99.95	2187
PBBR50003	EPI_ISL_16031323	BA.1	398198	29885	99.94	1730
PBBR50002	EPI_ISL_16031324	BA.1	467274	29886	99.94	2025
PBBR50001	EPI_ISL_16031325	BA.1	442464	29879	99.92	1911
PABR50051	EPI_ISL_16031326	BA.1.1.1	438087	29883	99.93	1881
PABR50050	EPI_ISL_16031327	BA.1.14	427046	29881	99.93	1847
PABR50049	EPI_ISL_16031328	BA.1.15	502905	29890	99.96	2175
PABR50048	EPI_ISL_16031329	BA.1.14.1	449870	29881	99.93	1947
PABR50045	EPI_ISL_16031330	BA.1	561493	29887	99.95	2416
PABR50044	EPI_ISL_16031331	BA.1	509788	29884	99.94	2188
PABR50043	EPI_ISL_16031332	BA.1.1	384894	29855	99.84	1667
PABR50037	EPI_ISL_16031333	BA.1.14.1	547065	29871	99.89	2359
PABR50036	EPI_ISL_16031334	BA.1.14.1	490827	29857	99.85	2118
PABR50015	EPI_ISL_16031335	BA.1.14.1	375201	29843	99.80	1615
PABR50014	EPI_ISL_16031336	BA.1.14.1	276111	29884	99.94	1205
PABR50013	EPI_ISL_16031337	BA.1.1	502908	29884	99.94	2183
PABR50012	EPI_ISL_16031338	BA.1.1	406865	29854	99.84	1745
PABR50011	EPI_ISL_16031339	BA.1.14.1	497692	29877	99.91	2158
PABR50010	EPI_ISL_16031340	BA.1.14	344100	29876	99.91	1485
PABR50009	EPI_ISL_16031341	BA.1.14	505257	29885	99.94	2175
PABR50008	EPI_ISL_16031342	BA.1.14.1	499153	29882	99.93	2153
PABR50007	EPI_ISL_16031343	BA.1.1	462964	29888	99.95	2002
PABR50006	EPI_ISL_16031344	BA.1.17.2	536661	29849	99.82	2315
PABR50005	EPI_ISL_16031345	BA.1.14.1	462911	29859	99.85	2012
PABR50004	EPI_ISL_16031346	BA.1.1	483314	29870	99.89	2087
PABR50003	EPI_ISL_16031347	BA.1	544180	29890	99.96	2339
PABR50002	EPI_ISL_16031348	BA.1	556237	29877	99.91	2395
PABR50001	EPI_ISL_16031349	BA.1.14.1	557151	29898	99.98	2407
MGBR50535	EPI_ISL_16031350	BA.1.1.1	552567	29681	99.26	2383
MGBR50534	EPI_ISL_16031351	BA.1	412735	29851	99.83	1786
MGBR50461	EPI_ISL_16031352	BA.1.9	486913	29855	99.84	2088
MGBR50440	EPI_ISL_16031353	BA.1	413157	29881	99.93	1786
MGBR50428	EPI_ISL_16031354	BA.1	511873	29870	99.89	2195
MGBR50404	EPI_ISL_16031355	BA.1	521519	29887	99.95	2241
MGBR50387	EPI_ISL_16031356	BA.1	450723	29868	99.88	1939
MGBR50332	EPI_ISL_16031357	BA.1.1	426185	29882	99.93	1843
MGBR50330	EPI_ISL_16031358	BA.1	578924	29887	99.95	2493
MGBR50324	EPI_ISL_16031359	BA.1	547827	29882	99.93	2351
MGBR50012	EPI_ISL_16031360	BA.1	505744	29868	99.88	2161
MGBR50010	EPI_ISL_16031361	BA.1	218485	29852	99.83	944
MGBR50009	EPI_ISL_16031362	BA.1	392088	29852	99.83	1702
MGBR50008	EPI_ISL_16031363	BA.1	362370	29844	99.80	1574
MGBR50007	EPI_ISL_16031364	BA.1	451338	29850	99.82	1948
MGBR50006	EPI_ISL_16031365	BA.1.14.1	456357	29878	99.92	1972
MGBR50004	EPI_ISL_16031366	BA.1	570184	29856	99.84	2458
GOBR50016	EPI_ISL_16031367	BA.1.1	494770	29883	99.93	2137
GOBR50015	EPI_ISL_16031368	BA.1.1	436035	29845	99.81	1879
GOBR50014	EPI_ISL_16031369	BA.1.14.1	463101	29885	99.94	1991
GOBR50010	EPI_ISL_16031370	BA.1.14.1	500017	29881	99.93	2143
GOBR50009	EPI_ISL_16031371	BA.1.14.1	547348	29888	99.95	2345
GOBR50003	EPI_ISL_16031372	BA.1.14.1	519056	29881	99.93	2228
ESBR50002	EPI_ISL_16031373	BA.1.17.2	422097	29878	99.92	1815
ESBR50001	EPI_ISL_16031374	BA.1.15	430373	29846	99.81	1862
CEBR50016	EPI_ISL_16031375	BA.1.1	417443	29887	99.95	1790
CEBR50015	EPI_ISL_16031376	BA.1	512517	29866	99.88	2211
CEBR50014	EPI_ISL_16031377	BA.1	507275	29890	99.96	2191
CEBR50013	EPI_ISL_16031378	BA.1.14.1	547384	29887	99.95	2394
CEBR50012	EPI_ISL_16031379	BA.1	395241	29865	99.87	1706
CEBR50011	EPI_ISL_16031380	BA.1	602301	29891	99.96	2606
CEBR50006	EPI_ISL_16031381	BA.1	484081	29843	99.80	2082
CEBR50005	EPI_ISL_16031382	BA.1	565181	29892	99.96	2441
CEBR50003	EPI_ISL_16031383	BA.1.14	489875	29846	99.81	2108
CEBR50001	EPI_ISL_16031384	BA.1	465132	29887	99.95	2004
BABR50029	EPI_ISL_16031385	BA.1.15	469527	29866	99.88	2027
BABR50028	EPI_ISL_16031386	BA.1	510058	29886	99.94	2207
BABR50027	EPI_ISL_16031387	BA.1	445159	29868	99.88	1921
BABR50023	EPI_ISL_16031388	BA.1.1	462494	29881	99.93	1998
BABR50020	EPI_ISL_16031389	BA.1.1	551172	29884	99.94	2360
BABR50005	EPI_ISL_16031390	BA.1	666291	29871	99.89	2877
BABR50004	EPI_ISL_16031391	BA.1.14.1	262102	29874	99.90	1146
BABR50003	EPI_ISL_16031392	BA.1.14.1	510572	29870	99.89	2187
APBR50003	EPI_ISL_16031393	BA.1.14.1	633980	29886	99.94	2712
APBR50002	EPI_ISL_16031394	BA.1.14.1	512962	29887	99.95	2219
MGBR50551	EPI_ISL_16031395	BA.1	409993	29873	99.90	1778
AC-LNCC-00275	EPI_ISL_16031396	BA.1.1	354030	29883	99.93	1516
MGBR50077	EPI_ISL_16031397	BA.1	459967	29862	99.86	1960
CEBR50002	EPI_ISL_16031398	BA.1	554291	29882	99.93	2387
MGBR50020	EPI_ISL_16031399	BA.1.14	428668	29864	99.87	1830
AC-LNCC-00359	EPI_ISL_16031400	BA.1.1	574298	29878	99.92	2424
PBBR50018	EPI_ISL_16031401	BA.1.1	372673	29701	99.32	1584
SPBR50021	EPI_ISL_16031402	BA.1.15	548684	29877	99.91	2368
GOBR50030	EPI_ISL_16031403	BA.1.1	317682	29886	99.94	1379
AC-LNCC-00357	EPI_ISL_16031404	BA.1	519448	29888	99.95	2187
MGBR50526	EPI_ISL_16031405	BA.1.1	471442	29879	99.92	2038
RJBR50013	EPI_ISL_16031406	BA.1.18	466697	29812	99.70	2013
PRBR50011	EPI_ISL_16031407	BA.1	506709	29729	99.42	2170
MGBR50011	EPI_ISL_16031408	BA.1.1	108458	28091	93.94	463
MTBR50002	EPI_ISL_16031409	BA.1.1	220484	27600	92.30	934
MGBR50087	EPI_ISL_16031410	BA.1.1	8449	29396	98.30	36
CEBR50018	EPI_ISL_16031411	BA.1.15	84386	27587	92.25	357
SPBR50048	EPI_ISL_16031412	BA.1	75124	29754	99.50	339
LNN08898	EPI_ISL_16031413	BA.1.17	334198	29021	97.05	1415
AC-LNCC-00311	EPI_ISL_16031414	BA.1.1	260961	29809	99.69	1098
AC-LNCC-00386	EPI_ISL_16031415	BA.1.1	421926	29776	99.58	1736
SPBR50069	EPI_ISL_16031416	BA.1.14	108299	29798	99.65	491
MGBR50552	EPI_ISL_16031417	BA.1.1	304628	29840	99.79	1306
BABR50025	EPI_ISL_16031418	BA.1.1	264904	29325	98.07	1146
LNN08916	EPI_ISL_16031419	BA.1.1	415787	28916	96.70	1769
RSBR50002	EPI_ISL_16031420	BA.1.1	293407	29239	97.78	1265
APBR50007	EPI_ISL_16031421	BA.1.1	323842	29757	99.51	1388
AC-LNCC-00295	EPI_ISL_16031422	BA.1.1	247591	29816	99.71	1042
MGBR50023	EPI_ISL_16031423	BA.1	333625	29525	98.74	1404
LNN08969	EPI_ISL_16031424	BA.1.17.2	303680	28776	96.23	1294
LNN08982	EPI_ISL_16031425	BA.1.1	351028	28096	93.96	1489
LNN08951	EPI_ISL_16031426	BA.2	285218	28053	93.81	1204
MGBR50105	EPI_ISL_16031427	BA.1.21	325739	29756	99.51	1396
LNN08934	EPI_ISL_16031428	BA.1.14.1	329044	28460	95.17	1399
LNN08917	EPI_ISL_16031429	BA.1.1.1	339255	28391	94.94	1440
LNN08959	EPI_ISL_16031430	BA.1	386967	27761	92.84	1625
MGBR50532	EPI_ISL_16031431	BA.1	22996	29157	97.51	104
PABR50035	EPI_ISL_16031432	BA.1	216002	29168	97.54	935
AC-LNCC-00332	EPI_ISL_16031433	BA.1.1	335575	29579	98.92	1394
AC-LNCC-00310	EPI_ISL_16031434	BA.1.1	240755	29551	98.82	1017
MGBR50507	EPI_ISL_16031435	BA.1.15	171742	29815	99.71	747
AC-LNCC-00368	EPI_ISL_16031436	BA.1.1	370095	29698	99.31	1530
MGBR50005	EPI_ISL_16031437	BA.1.1	107991	28909	96.68	494
LNN08987	EPI_ISL_16031438	BA.1.15	301165	28583	95.59	1283
MGBR50086	EPI_ISL_16031439	BA.1.1	44194	29130	97.42	202
TOBR00077	EPI_ISL_16031440	AY.99.2	413051	29902	100.00	1792
MGBR50042	EPI_ISL_16031441	AY.99.1	472858	29895	99.97	2006
MGBR50036	EPI_ISL_16031442	AY.99.1	493282	29887	99.95	2086
MGBR50033	EPI_ISL_16031443	AY.99.1	480277	29891	99.96	2036
BABR50008	EPI_ISL_16031444	AY.99.1	398801	29882	99.93	1729
MGBR50035	EPI_ISL_16031445	AY.99.2	472161	29891	99.96	2006
TOBR00084	EPI_ISL_16031446	AY.99.2	558002	29897	99.98	2389
TOBR00044	EPI_ISL_16031447	AY.99.2	534912	29892	99.96	2310
TOBR00035	EPI_ISL_16031448	AY.99.2	507599	29898	99.98	2183
TOBR00041	EPI_ISL_16031449	AY.99.2	501866	29900	99.99	2167
TOBR00023	EPI_ISL_16031450	AY.99.2	497081	29894	99.97	2146
TOBR00045	EPI_ISL_16031451	AY.99.2	495198	29900	99.99	2127
TOBR00082	EPI_ISL_16031452	AY.99.2	494218	29868	99.88	2124
TOBR00052	EPI_ISL_16031453	AY.99.2	488996	29887	99.95	2099
TOBR00018	EPI_ISL_16031454	AY.99.2	488228	29858	99.85	2088
TOBR00043	EPI_ISL_16031455	AY.99.2	481741	29887	99.95	2068
TOBR00037	EPI_ISL_16031456	AY.99.2	479724	29858	99.85	2058
TOBR00092	EPI_ISL_16031457	AY.99.2	471597	29857	99.85	2024
TOBR00042	EPI_ISL_16031458	AY.99.2	462470	29896	99.98	1986
TOBR00091	EPI_ISL_16031459	AY.99.2	458501	29895	99.97	1971
TOBR00040	EPI_ISL_16031460	AY.99.2	440785	29889	99.95	1901
TOBR00054	EPI_ISL_16031461	AY.99.2	410881	29860	99.86	1767
TOBR00001	EPI_ISL_16031462	AY.99.2	398272	29892	99.96	1705
TOBR00080	EPI_ISL_16031463	AY.99.2	276265	29890	99.96	1199
PABR50054	EPI_ISL_16031464	AY.99.2	557733	29899	99.99	2376
TOBR00057	EPI_ISL_16031465	AY.99.2	490867	29896	99.98	2112
TOBR00093	EPI_ISL_16031466	AY.99.2	513709	29886	99.94	2210
PRBR50005	EPI_ISL_16031467	BA.1.1	472929	29896	99.98	2044
CEBR50007	EPI_ISL_16031468	BA.1.1	389211	29863	99.87	1671
AC-LNCC-00360	EPI_ISL_16031469	BA.1.1	471450	29849	99.82	1976
PBBR50011	EPI_ISL_16031470	BA.1	343464	29863	99.87	1490
AC-LNCC-00367	EPI_ISL_16031471	BA.1.1	510012	29875	99.91	2124
ROBR50002	EPI_ISL_16031472	BA.1.1	364656	29871	99.89	1584
MGBR50013	EPI_ISL_16031473	BA.1.1	474042	29807	99.68	2036
BABR50006	EPI_ISL_16031474	AY.99.2	443635	29858	99.85	1868
LNN08963	EPI_ISL_16031475	BA.1.21	516767	29867	99.88	2215
MGBR50112	EPI_ISL_16031476	BA.1	419466	29849	99.82	1812
LNN08956	EPI_ISL_16031477	BA.1.17	521268	29885	99.94	2235
CEBR50009	EPI_ISL_16031478	BA.1	475268	29842	99.80	2036
CEBR50033	EPI_ISL_16031479	BA.1	449529	29844	99.80	1919
MGBR50092	EPI_ISL_16031480	BA.1	469328	29857	99.85	1991
SEBR50001	EPI_ISL_16031481	BA.1.1	404996	29829	99.75	1743
AC-LNCC-00347	EPI_ISL_16031482	BA.1.1	381366	29871	99.89	1608
SPBR50072	EPI_ISL_16031483	BA.1	407020	29852	99.83	1754
CEBR50166	EPI_ISL_16031484	BA.1	383550	29861	99.86	1651
LNN08908	EPI_ISL_16031485	BA.2	497277	29718	99.38	2130
GOBR50004	EPI_ISL_16031486	BA.1.1	352796	29861	99.86	1531
PABR50018	EPI_ISL_16031487	AY.99.2	72523	29840	99.79	322
AC-LNCC-00202	EPI_ISL_16031488	BA.1.1	336860	29843	99.80	1416
MGBR50097	EPI_ISL_16031489	BA.1.1.14	321118	29862	99.86	1395
MGBR50537	EPI_ISL_16031490	BA.1.1	388052	29845	99.81	1675
CEBR50037	EPI_ISL_16031491	BA.1.1	361246	29852	99.83	1531
PABR50042	EPI_ISL_16031492	BA.1.14.1	365160	29887	99.95	1577
LNN08899	EPI_ISL_16031493	BA.1.1	562317	29793	99.63	2400
AC-LNCC-00313	EPI_ISL_16031494	BA.1.1	354663	29869	99.89	1492
LNN08962	EPI_ISL_16031495	BA.1	486969	29823	99.73	2098
AC-LNCC-00380	EPI_ISL_16031496	BA.1.1	489412	29843	99.80	2036
MGBR50029	EPI_ISL_16031497	BA.1	406282	29786	99.61	1721
LNN08950	EPI_ISL_16031498	BA.1.17	448952	29877	99.91	1929
MGBR50536	EPI_ISL_16031499	BA.1.1	462079	29879	99.92	1978
CEBR50017	EPI_ISL_16031500	BA.1	407336	29844	99.80	1750
PRBR50009	EPI_ISL_16031501	BA.1.1.14	539570	29869	99.89	2322
AC-LNCC-00363	EPI_ISL_16031502	BA.1.1	434485	29848	99.82	1819
RSBR50019	EPI_ISL_16031503	BA.1.1	365223	29880	99.92	1576
RJBR50049	EPI_ISL_16031504	BA.1	370751	29867	99.88	1581
AC-LNCC-00352	EPI_ISL_16031505	BA.1.1	411133	29840	99.79	1730
LNN08947	EPI_ISL_16031506	BA.1	479787	29845	99.81	2056
MGBR50350	EPI_ISL_16031507	BA.1	427939	29844	99.80	1832
AC-LNCC-00381	EPI_ISL_16031508	BA.1.1	400004	29835	99.77	1670
BABR50024	EPI_ISL_16031509	BA.1	445113	29880	99.92	1910
LNN08978	EPI_ISL_16031510	BA.1.1	580568	29886	99.94	2490
LNN08942	EPI_ISL_16031511	BA.1.1	408115	29386	98.27	1739
BABR50026	EPI_ISL_16031512	BA.1	454298	29844	99.80	1954
MGBR50351	EPI_ISL_16031513	BA.1	351916	29878	99.92	1516
MGBR50494	EPI_ISL_16031514	BA.1.1	292917	29855	99.84	1278
PBBR50013	EPI_ISL_16031515	BA.1	365023	29634	99.10	1542
AC-LNCC-00356	EPI_ISL_16031516	BA.1.1	202523	29857	99.85	855
LNN08931	EPI_ISL_16031517	BA.1.1	534325	29887	99.95	2284
LNN08921	EPI_ISL_16031518	BA.1.1	671998	29830	99.76	2854
MGBR50118	EPI_ISL_16031519	BA.1	411446	29755	99.51	1769
LNN08923	EPI_ISL_16031520	BA.1.1	560019	29771	99.56	2380
LNN08943	EPI_ISL_16031521	BA.1.17	501755	29823	99.73	2154
LNN08907	EPI_ISL_16031522	BA.1.17	547689	29790	99.62	2338
LNN08905	EPI_ISL_16031523	BA.1.1	627850	29856	99.84	2680
LNN08902	EPI_ISL_16031524	BA.1.1	469493	29601	98.99	1997
CEBR50008	EPI_ISL_16031525	BA.1	536904	29877	99.91	2296
LNN08906	EPI_ISL_16031526	BA.1	516490	29437	98.44	2202
MGBR50026	EPI_ISL_16031527	BA.1	358549	29860	99.86	1508
MGBR50015	EPI_ISL_16031528	BA.1	336549	29846	99.81	1419
LNN08919	EPI_ISL_16031529	BA.1.1	525212	29769	99.55	2244
LNN08988	EPI_ISL_16031530	BA.1.1	490862	29877	99.91	2113
AC-LNCC-00322	EPI_ISL_16031531	BA.1.1	395289	29850	99.82	1655
GOBR50013	EPI_ISL_16031532	BA.1.14.1	322272	29360	98.18	1378
AC-LNCC-00296	EPI_ISL_16031533	BA.1.1	283639	29815	99.71	1195
LNN08909	EPI_ISL_16031534	BA.1	476931	29551	98.82	2042
LNN08925	EPI_ISL_16031535	BA.2	56430	29642	99.13	258
LNN08920	EPI_ISL_16031536	BA.1.14.1	458822	29691	99.29	1961
MGBR50028	EPI_ISL_16031537	BA.1.1	438972	29846	99.81	1852
RSBR50004	EPI_ISL_16031538	BA.1.14.1	337659	29597	98.98	1449
LNN08582	EPI_ISL_16031539	BA.1.17	477303	29727	99.41	2052
MGBR50096	EPI_ISL_16031540	BA.1.14.1	464484	29843	99.80	1960
LNN08940	EPI_ISL_16031541	BA.1	354872	29095	97.30	1510
LNN08901	EPI_ISL_16031542	BA.1.1	569876	29470	98.55	2427
MGBR50347	EPI_ISL_16031543	BA.1.14.1	296890	29841	99.79	1281
MGBR50090	EPI_ISL_16031544	BA.1	450181	29644	99.13	1903
MGBR50091	EPI_ISL_16031545	BA.1	447945	29855	99.84	1893
PABR50052	EPI_ISL_16031546	BA.1	82837	29828	99.75	379
SPBR50001	EPI_ISL_16031547	BA.1	33506	29831	99.76	150
AC-LNCC-00339	EPI_ISL_16031548	BA.1.1	268709	29648	99.15	1138
CEBR50004	EPI_ISL_16031549	BA.1.1	299531	29394	98.30	1294
LNN08904	EPI_ISL_16031550	BA.1.1	486664	29482	98.59	2074
LNN08900	EPI_ISL_16031551	BA.1	427710	29610	99.02	1812
GOBR50017	EPI_ISL_16031552	BA.1.1.15	54645	29733	99.43	253
LNN08922	EPI_ISL_16031553	BA.1.1	544708	28649	95.81	2315
LNN08918	EPI_ISL_16031554	BA.1.1	413033	29246	97.80	1759
MGBR50331	EPI_ISL_16031555	BA.1	364193	29172	97.56	1556
LNN08926	EPI_ISL_16031556	BA.1.1	404844	28940	96.78	1723
LNN08903	EPI_ISL_16031557	BA.1.1	451493	28849	96.48	1913
LNN08975	EPI_ISL_16031558	BA.1.15	356860	29113	97.36	1526
SPBR50148	EPI_ISL_16031559	BA.1.1	78251	29651	99.16	359
MGBR50447	EPI_ISL_16031560	BA.1.14.1	309153	29221	97.72	1328
RJBR50053	EPI_ISL_16033493	BA.1	540538	29880	99.92	2324
RJBR50060	EPI_ISL_16033494	BA.1	456660	29892	99.96	1971
RJBR50061	EPI_ISL_16033495	BA.1	400668	29861	99.86	1727
RJBR50062	EPI_ISL_16033496	BA.1.14.1	403907	29874	99.90	1743
RJBR50063	EPI_ISL_16033497	BA.1	459463	29879	99.92	1982
RJBR50064	EPI_ISL_16033498	BA.1.18	426457	29843	99.80	1811
RJBR50065	EPI_ISL_16033499	BA.1.1	466299	29889	99.95	1993
RJBR50066	EPI_ISL_16033500	BA.1.15	425414	29868	99.88	1809
RJBR50067	EPI_ISL_16033501	BA.1	513891	29848	99.82	2193
RJBR50068	EPI_ISL_16033502	BA.1	460073	29887	99.95	1978
RJBR50069	EPI_ISL_16033503	BA.1	485817	29876	99.91	2078
RJBR50070	EPI_ISL_16033504	BA.1.15	454782	29870	99.89	1943
RJBR50071	EPI_ISL_16033505	BA.1.15	528136	29889	99.95	2256
RJBR50072	EPI_ISL_16033506	BA.1.14.1	559040	29884	99.94	2360
RJBR50073	EPI_ISL_16033507	BA.1	537338	29880	99.92	2318
RJBR50074	EPI_ISL_16033508	BA.1.1	486275	29892	99.96	2093
RJBR50097	EPI_ISL_16033509	BA.1.14.2	492472	29846	99.81	2121
RJBR50098	EPI_ISL_16033510	BA.1.15	485494	29891	99.96	2084
RJBR50099	EPI_ISL_16033511	BA.1	463689	29860	99.86	1985
RJBR50107	EPI_ISL_16033512	BA.1.15	568544	29885	99.94	2451
RNBR50002	EPI_ISL_16033513	BA.1	453149	29880	99.92	1924
ROBR50007	EPI_ISL_16033514	AY.99.2	421528	29894	99.97	1816
RSBR50001	EPI_ISL_16033515	AY.99.2	436216	29832	99.76	1872
RSBR50006	EPI_ISL_16033516	BA.1.17.2	370256	29881	99.93	1568
RSBR50007	EPI_ISL_16033517	BA.1.15	477131	29883	99.93	2038
RSBR50008	EPI_ISL_16033518	BA.1	450295	29892	99.96	1911
RSBR50009	EPI_ISL_16033519	BA.1.17.2	445880	29868	99.88	1891
RSBR50010	EPI_ISL_16033520	BA.1.1	509673	29888	99.95	2168
RSBR50011	EPI_ISL_16033521	BA.1.17.2	511340	29888	99.95	2167
RSBR50012	EPI_ISL_16033522	BA.1.17.2	419924	29768	99.55	1768
RSBR50013	EPI_ISL_16033523	BA.1.17.2	436633	29868	99.88	1899
RSBR50016	EPI_ISL_16033524	BA.1.19	433531	29882	99.93	1841
RSBR50020	EPI_ISL_16033525	BA.1	425641	29880	99.92	1877
RSBR50021	EPI_ISL_16033526	BA.1.14.1	562467	29876	99.91	2413
RSBR50024	EPI_ISL_16033527	AY.99.2	426924	29887	99.95	1805
SCBR50004	EPI_ISL_16033528	BA.1.1	400695	29862	99.86	1695
SEBR50003	EPI_ISL_16033529	BA.1.14.1	471617	29870	99.89	2017
SPBR50016	EPI_ISL_16033530	BA.1	461872	29880	99.92	1976
SPBR50017	EPI_ISL_16033531	BA.1	315964	29880	99.92	1351
SPBR50018	EPI_ISL_16033532	BA.1	607984	29892	99.96	2584
SPBR50019	EPI_ISL_16033533	BA.1.1	437216	29875	99.91	1890
SPBR50022	EPI_ISL_16033534	AY.99.2	530411	29891	99.96	2248
SPBR50032	EPI_ISL_16033535	BA.1	403686	29854	99.84	1717
SPBR50036	EPI_ISL_16033536	BA.1.1.14	441937	29848	99.82	1916
SPBR50039	EPI_ISL_16033537	BA.1.1	516179	29866	99.88	2190
SPBR50043	EPI_ISL_16033538	BA.1	492701	29889	99.95	2099
SPBR50045	EPI_ISL_16033539	BA.1	543755	29890	99.96	2307
SPBR50047	EPI_ISL_16033540	BA.1.14	459137	29885	99.94	1991
SPBR50051	EPI_ISL_16033541	AY.99.2	460390	29891	99.96	1977
SPBR50052	EPI_ISL_16033542	BA.1	485556	29844	99.80	2066
SPBR50081	EPI_ISL_16033543	AY.43.7	545594	29893	99.97	2299
SPBR50082	EPI_ISL_16033544	AY.43.1	425690	29881	99.93	1835
SPBR50083	EPI_ISL_16033545	AY.116	467858	29897	99.98	2025
SPBR50084	EPI_ISL_16033546	AY.99.2	434644	29853	99.83	1872
SPBR50085	EPI_ISL_16033547	AY.43.2	293638	29896	99.98	1264
SPBR50086	EPI_ISL_16033548	AY.99.2	349929	29858	99.85	1513
SPBR50087	EPI_ISL_16033549	AY.99.2	439154	29898	99.98	1906
SPBR50088	EPI_ISL_16033550	BA.1	482247	29887	99.95	2073
SPBR50089	EPI_ISL_16033551	BA.1	483427	29841	99.79	2062
SPBR50090	EPI_ISL_16033552	BA.1.17	449898	29887	99.95	1923
SPBR50091	EPI_ISL_16033553	BA.1	466258	29886	99.94	1984
SPBR50092	EPI_ISL_16033554	BA.1	536722	29851	99.83	2291
SPBR50093	EPI_ISL_16033555	BA.1	415640	29880	99.92	1775
SPBR50094	EPI_ISL_16033556	BA.1	52093	29348	98.14	236
SPBR50095	EPI_ISL_16033557	BA.1	572731	29881	99.93	2428
SPBR50096	EPI_ISL_16033558	BA.1	510328	29869	99.89	2171
SPBR50097	EPI_ISL_16033559	BA.1.15	388609	29881	99.93	1677
SPBR50098	EPI_ISL_16033560	BA.2	457015	29886	99.94	1978
SPBR50099	EPI_ISL_16033561	BA.1.15	72938	29873	99.90	333
SPBR50100	EPI_ISL_16033562	BA.1	51283	29824	99.74	240
SPBR50155	EPI_ISL_16033563	BA.1.1	464744	29888	99.95	1974
SPBR50156	EPI_ISL_16033564	BA.1.15	502628	29885	99.94	2135
SPBR50157	EPI_ISL_16033565	BA.1.15	454806	29882	99.93	1939
SPBR50158	EPI_ISL_16033566	BA.1.1	467762	29846	99.81	1995
SPBR50159	EPI_ISL_16033567	BA.1.1	409696	29853	99.83	1756
SPBR50160	EPI_ISL_16033568	BA.1.14.2	448715	29841	99.79	1897
TOBR50011	EPI_ISL_16033569	BA.1.14.1	368679	29834	99.77	1570
TOBR50012	EPI_ISL_16033570	AY.99.2	560270	29897	99.98	2376
TOBR50014	EPI_ISL_16033571	BA.1.13	337068	29805	99.67	1430
TOBR50015	EPI_ISL_16033572	BA.1.14.1	476024	29891	99.96	2062
TOBR50016	EPI_ISL_16033573	BA.1.14.1	452634	29886	99.94	1967
TOBR50017	EPI_ISL_16033574	BA.1.14.1	350990	29859	99.85	1514
TOBR50018	EPI_ISL_16033575	BA.1.14.1	493372	29853	99.83	2128
BABR50001	EPI_ISL_16033576	BA.1.14.1	348575	29848	99.82	1501
BABR50011	EPI_ISL_16033577	AY.99.2	573632	29882	99.93	2448
BABR50016	EPI_ISL_16033578	BA.1.1	524156	29871	99.89	2226
BABR50017	EPI_ISL_16033579	AY.43.2	613892	29878	99.92	2597
BABR50018	EPI_ISL_16033580	AY.124	517340	29898	99.98	2226
BABR50022	EPI_ISL_16033581	AY.99.2	455956	29890	99.96	1959
CEBR50043	EPI_ISL_16033582	BA.1	472657	29880	99.92	2016
CEBR50044	EPI_ISL_16033583	BA.1	490000	29883	99.93	2094
CEBR50045	EPI_ISL_16033584	BA.1.1	472927	29851	99.83	2016
CEBR50046	EPI_ISL_16033585	BA.1	441653	29884	99.94	1884
CEBR50047	EPI_ISL_16033586	BA.1	445502	29885	99.94	1903
CEBR50048	EPI_ISL_16033587	BA.1	458280	29886	99.94	1952
CEBR50049	EPI_ISL_16033588	BA.1.1	527337	29885	99.94	2247
CEBR50050	EPI_ISL_16033589	BA.1	454540	29876	99.91	1937
CEBR50051	EPI_ISL_16033590	BA.1.1	465727	29870	99.89	1990
CEBR50052	EPI_ISL_16033591	BA.1.14.1	448021	29875	99.91	1910
CEBR50053	EPI_ISL_16033592	BA.1	537135	29889	99.95	2287
CEBR50054	EPI_ISL_16033593	BA.1.1	471096	29854	99.84	2003
CEBR50055	EPI_ISL_16033594	BA.1.1	458642	29886	99.94	1965
CEBR50056	EPI_ISL_16033595	BA.1.1	505591	29884	99.94	2152
CEBR50057	EPI_ISL_16033596	BA.1	354650	29883	99.93	1522
CEBR50058	EPI_ISL_16033597	BA.1.1	490183	29878	99.92	2090
CEBR50059	EPI_ISL_16033598	BA.1.1	482045	29873	99.90	2048
CEBR50060	EPI_ISL_16033599	BA.1	441216	29868	99.88	1882
CEBR50061	EPI_ISL_16033600	BA.1.1	139295	28336	94.76	593
CEBR50062	EPI_ISL_16033601	BA.1.1	559050	29889	99.95	2380
CEBR50063	EPI_ISL_16033602	BA.1	443684	29885	99.94	1891
CEBR50064	EPI_ISL_16033603	BA.1.1	534469	29871	99.89	2266
CEBR50065	EPI_ISL_16033604	BA.1.1	520185	29887	99.95	2217
CEBR50066	EPI_ISL_16033605	BA.1	571842	29891	99.96	2432
CEBR50067	EPI_ISL_16033606	BA.1.1.14	516172	29885	99.94	2189
CEBR50068	EPI_ISL_16033607	BA.1.1	530134	29848	99.82	2251
CEBR50069	EPI_ISL_16033608	BA.1	408803	29844	99.80	1729
CEBR50070	EPI_ISL_16033609	BA.1.1	508041	29846	99.81	2163
CEBR50071	EPI_ISL_16033610	BA.1	556514	29871	99.89	2359
CEBR50072	EPI_ISL_16033611	BA.1.1.14	529678	29852	99.83	2240
CEBR50073	EPI_ISL_16033612	BA.1	586205	29888	99.95	2482
CEBR50074	EPI_ISL_16033613	BA.1	636764	29893	99.97	2694
CEBR50075	EPI_ISL_16033614	AY.99.1	546841	29899	99.99	2361
CEBR50076	EPI_ISL_16033615	AY.99.2	510417	29896	99.98	2195
CEBR50078	EPI_ISL_16033616	BA.1	552050	29890	99.96	2381
CEBR50079	EPI_ISL_16033617	BA.1.1	159925	28335	94.76	675
CEBR50080	EPI_ISL_16033618	BA.1.1	589691	29883	99.93	2533
CEBR50081	EPI_ISL_16033619	BA.1	500384	29884	99.94	2145
CEBR50082	EPI_ISL_16033620	BA.1.14	590011	29888	99.95	2540
CEBR50083	EPI_ISL_16033621	BA.1.1	606428	29873	99.90	2594
CEBR50084	EPI_ISL_16033622	BA.1	561181	29886	99.94	2408
CEBR50085	EPI_ISL_16033623	BA.1	564811	29886	99.94	2425
CEBR50086	EPI_ISL_16033624	BA.1	559308	29885	99.94	2395
CEBR50087	EPI_ISL_16033625	BA.1.1	518315	29888	99.95	2233
CEBR50088	EPI_ISL_16033626	BA.1	580545	29887	99.95	2479
CEBR50089	EPI_ISL_16033627	BA.1	507366	29845	99.81	2174
CEBR50090	EPI_ISL_16033628	BA.1	457694	29867	99.88	1957
CEBR50091	EPI_ISL_16033629	BA.1	506803	29888	99.95	2174
CEBR50092	EPI_ISL_16033630	BA.1	472777	29510	98.69	2008
CEBR50093	EPI_ISL_16033631	BA.1	552988	29860	99.86	2357
CEBR50094	EPI_ISL_16033632	BA.1	453923	29852	99.83	1945
CEBR50095	EPI_ISL_16033633	BA.1	462124	29884	99.94	1974
CEBR50096	EPI_ISL_16033634	BA.1.1	544226	29850	99.82	2333
CEBR50097	EPI_ISL_16033635	BA.1.1	353111	29345	98.13	1496
CEBR50098	EPI_ISL_16033636	BA.1	624299	29891	99.96	2673
CEBR50099	EPI_ISL_16033637	BA.1.1	509284	29873	99.90	2189
CEBR50100	EPI_ISL_16033638	BA.1.1	434528	29842	99.80	1855
CEBR50101	EPI_ISL_16033639	BA.1.1	633014	29884	99.94	2714
CEBR50102	EPI_ISL_16033640	BA.1	630300	29870	99.89	2690
CEBR50103	EPI_ISL_16033641	BA.1	756969	29859	99.85	3216
CEBR50104	EPI_ISL_16033642	BA.1	519084	29884	99.94	2224
CEBR50105	EPI_ISL_16033643	BA.1	615568	29876	99.91	2639
CEBR50106	EPI_ISL_16033644	BA.1	585970	29851	99.83	2497
CEBR50107	EPI_ISL_16033645	BA.1.1	590083	29889	99.95	2518
CEBR50108	EPI_ISL_16033646	BA.1	214633	29139	97.45	916
CEBR50109	EPI_ISL_16033647	BA.1	545961	29880	99.92	2317
CEBR50110	EPI_ISL_16033648	BA.1	472249	29719	99.38	2012
CEBR50111	EPI_ISL_16033649	BA.1	306945	29567	98.88	1305
CEBR50112	EPI_ISL_16033650	BA.1.1	499941	29882	99.93	2154
CEBR50113	EPI_ISL_16033651	AY.34.1.1	482579	29895	99.97	2083
CEBR50114	EPI_ISL_16033652	AY.99.2	502582	29900	99.99	2150
CEBR50115	EPI_ISL_16033653	AY.99.2	423706	29823	99.73	1824
CEBR50116	EPI_ISL_16033654	BA.1	572517	29855	99.84	2445
CEBR50117	EPI_ISL_16033655	BA.1.14	547930	29849	99.82	2337
CEBR50118	EPI_ISL_16033656	BA.1	554308	29856	99.84	2371
CEBR50119	EPI_ISL_16033657	BA.1	427130	29879	99.92	1839
CEBR50120	EPI_ISL_16033658	BA.1.1	322423	29887	99.95	1405
CEBR50121	EPI_ISL_16033659	BA.1.15	591629	29882	99.93	2540
CEBR50122	EPI_ISL_16033660	BA.1	549040	29880	99.92	2355
CEBR50123	EPI_ISL_16033661	BA.1	513269	29880	99.92	2204
CEBR50124	EPI_ISL_16033662	BA.1	579738	29875	99.91	2479
CEBR50125	EPI_ISL_16033663	BA.1	553969	29877	99.91	2371
CEBR50126	EPI_ISL_16033664	BA.1	509929	29864	99.87	2185
CEBR50127	EPI_ISL_16033665	BA.1	595934	29889	99.95	2545
CEBR50128	EPI_ISL_16033666	BA.1	611604	29885	99.94	2619
ESBR50004	EPI_ISL_16033667	AY.99.1	520399	29859	99.85	2235
ESBR50005	EPI_ISL_16033668	BA.1	565427	29887	99.95	2445
GOBR50006	EPI_ISL_16033669	BA.1	545080	29877	99.91	2325
GOBR50007	EPI_ISL_16033670	BA.1	504547	29891	99.96	2174
GOBR50008	EPI_ISL_16033671	BA.1.15	446513	29876	99.91	1927
MABR50001	EPI_ISL_16033672	BA.1.14	447810	29877	99.91	1911
MGBR50001	EPI_ISL_16033673	BA.1.15	524506	29886	99.94	2257
MGBR50130	EPI_ISL_16033674	BA.1	455689	29884	99.94	1948
MGBR50131	EPI_ISL_16033675	BA.1.1	381869	29887	99.95	1621
MGBR50132	EPI_ISL_16033676	BA.1.14.2	441290	29874	99.90	1878
MGBR50133	EPI_ISL_16033677	BA.1.1.1	415265	29868	99.88	1766
MGBR50134	EPI_ISL_16033678	BA.1.1	494026	29881	99.93	2104
MGBR50135	EPI_ISL_16033679	BA.1	482237	29847	99.81	2054
MGBR50136	EPI_ISL_16033680	BA.1.1	512235	29888	99.95	2177
MGBR50137	EPI_ISL_16033681	BA.1.15	169390	29871	99.89	738
MGBR50138	EPI_ISL_16033682	BA.1.14.2	548679	29880	99.92	2322
MGBR50139	EPI_ISL_16033683	AY.43.1	462760	29884	99.94	1994
MGBR50140	EPI_ISL_16033684	AY.43.1	392214	29881	99.93	1711
MGBR50141	EPI_ISL_16033685	AY.99.1	482092	29901	99.99	2092
MGBR50142	EPI_ISL_16033686	AY.99.2	521704	29885	99.94	2244
MGBR50144	EPI_ISL_16033687	AY.43.1	458392	29888	99.95	1968
MGBR50146	EPI_ISL_16033688	AY.46.3	532597	29884	99.94	2285
MGBR50147	EPI_ISL_16033689	AY.99.2	536645	29899	99.99	2298
MGBR50148	EPI_ISL_16033690	AY.99.2	545317	29898	99.98	2346
MGBR50149	EPI_ISL_16033691	AY.44	571557	29902	100.00	2462
MGBR50150	EPI_ISL_16033692	AY.43.1	363368	29896	99.98	1560
MGBR50151	EPI_ISL_16033693	AY.99.2	473223	29894	99.97	2031
MGBR50152	EPI_ISL_16033694	AY.46.3	542020	29857	99.85	2331
MGBR50153	EPI_ISL_16033695	BA.1.14.1	612682	29874	99.90	2629
MGBR50154	EPI_ISL_16033696	BA.1.15	428851	29897	99.98	1874
MGBR50155	EPI_ISL_16033697	BA.1.1	477215	29885	99.94	2053
MGBR50156	EPI_ISL_16033698	BA.1	340051	29876	99.91	1465
MGBR50157	EPI_ISL_16033699	BA.1.1	150948	27320	91.36	632
MGBR50158	EPI_ISL_16033700	BA.1	175448	29083	97.26	746
MGBR50159	EPI_ISL_16033701	BA.1.1	296466	29845	99.81	1265
MGBR50160	EPI_ISL_16033702	BA.1.1	336238	29857	99.85	1446
MGBR50161	EPI_ISL_16033703	BA.1	491018	29851	99.83	2104
MGBR50162	EPI_ISL_16033704	BA.1.19	457295	29845	99.81	1957
MGBR50164	EPI_ISL_16033705	BA.1.14.2	313575	29605	99.00	1336
MGBR50165	EPI_ISL_16033706	AY.99.2	506519	29870	99.89	2170
MGBR50166	EPI_ISL_16033707	AY.99.2	484418	29902	100.00	2078
MGBR50167	EPI_ISL_16033708	AY.43.1	522583	29899	99.99	2248
MGBR50168	EPI_ISL_16033709	AY.43.1	371530	29885	99.94	1595
MGBR50169	EPI_ISL_16033710	AY.99.2	317161	29771	99.56	1347
MGBR50171	EPI_ISL_16033711	BA.1.17.2	602739	29883	99.93	2583
MGBR50172	EPI_ISL_16033712	BA.1.1	519507	29879	99.92	2231
MGBR50174	EPI_ISL_16033713	BA.1	482927	29885	99.94	2078
MGBR50177	EPI_ISL_16033714	BA.1.1	571414	29891	99.96	2476
MGBR50178	EPI_ISL_16033715	BA.1	487209	29868	99.88	2087
MGBR50179	EPI_ISL_16033716	BA.1	393270	29882	99.93	1696
MGBR50180	EPI_ISL_16033717	BA.1	532277	29888	99.95	2290
MGBR50181	EPI_ISL_16033718	BA.1	452577	29491	98.62	1931
MGBR50183	EPI_ISL_16033719	BA.1	512936	29883	99.93	2201
MGBR50298	EPI_ISL_16033720	BA.1	452708	29885	99.94	1932
MGBR50299	EPI_ISL_16033721	BA.1.1	467691	29868	99.88	2004
MGBR50300	EPI_ISL_16033722	BA.1	544762	29844	99.80	2314
MGBR50301	EPI_ISL_16033723	BA.1	466423	29851	99.83	2005
MGBR50302	EPI_ISL_16033724	BA.1.1	533307	29886	99.94	2293
MGBR50303	EPI_ISL_16033725	BA.1	627355	29891	99.96	2694
MGBR50326	EPI_ISL_16033726	BA.1	98804	29862	99.86	444
MGBR50327	EPI_ISL_16033727	BA.1	588415	29865	99.87	2511
MGBR50328	EPI_ISL_16033728	BA.1.1	503557	29872	99.90	2169
MGBR50329	EPI_ISL_16033729	BA.1	548690	29888	99.95	2353
MGBR50353	EPI_ISL_16033730	BA.1	487826	29847	99.81	2077
MGBR50354	EPI_ISL_16033731	BA.1	395395	29874	99.90	1708
MGBR50356	EPI_ISL_16033732	BA.1	508193	29849	99.82	2168
MGBR50357	EPI_ISL_16033733	BA.1.1	540849	29862	99.86	2304
MGBR50358	EPI_ISL_16033734	BA.1.1	261149	29394	98.30	1096
MGBR50359	EPI_ISL_16033735	BA.1.1	522547	29884	99.94	2255
MGBR50360	EPI_ISL_16033736	BA.1.14.1	396220	29847	99.81	1682
MGBR50361	EPI_ISL_16033737	BA.1.14.1	605902	29884	99.94	2587
MGBR50376	EPI_ISL_16033738	BA.1.1	464331	29838	99.78	1958
MGBR50378	EPI_ISL_16033739	BA.1	447404	29882	99.93	1929
MGBR50386	EPI_ISL_16033740	BA.1.1	470035	29890	99.96	2014
MGBR50390	EPI_ISL_16033741	BA.1	407082	29845	99.81	1734
MGBR50391	EPI_ISL_16033742	BA.1	550441	29879	99.92	2338
MGBR50392	EPI_ISL_16033743	BA.1	543850	29891	99.96	2301
MGBR50393	EPI_ISL_16033744	BA.1	598520	29892	99.96	2539
MGBR50394	EPI_ISL_16033745	BA.1.14	593334	29889	99.95	2543
MGBR50395	EPI_ISL_16033746	BA.1	505618	29883	99.93	2155
MGBR50405	EPI_ISL_16033747	BA.1.17.2	585171	29892	99.96	2499
MGBR50406	EPI_ISL_16033748	BA.1	389772	29727	99.41	1649
MGBR50411	EPI_ISL_16033749	AY.99.2	456643	29899	99.99	1974
MGBR50412	EPI_ISL_16033750	AY.99.2	517294	29857	99.85	2225
MGBR50413	EPI_ISL_16033751	BA.1	522291	29866	99.88	2234
MGBR50414	EPI_ISL_16033752	BA.1.1.14	441443	29860	99.86	1900
MGBR50424	EPI_ISL_16033753	AY.99.2	494985	29899	99.99	2131
MGBR50429	EPI_ISL_16033754	BA.1.1	518362	29890	99.96	2230
MGBR50430	EPI_ISL_16033755	BA.1.1	577314	29892	99.96	2497
MGBR50432	EPI_ISL_16033756	BA.1.1	489905	29843	99.80	2091
MGBR50433	EPI_ISL_16033757	BA.1	528069	29879	99.92	2261
MGBR50437	EPI_ISL_16033758	BA.1.1	438596	29884	99.94	1867
MGBR50442	EPI_ISL_16033759	BA.1	387860	29764	99.54	1648
MGBR50445	EPI_ISL_16033760	BA.1.1	484798	29873	99.90	2084
MGBR50449	EPI_ISL_16033761	BA.1	475908	29857	99.85	2039
MGBR50450	EPI_ISL_16033762	BA.1.14.1	545719	29888	99.95	2335
MGBR50451	EPI_ISL_16033763	BA.1.14.1	576312	29894	99.97	2472
MGBR50462	EPI_ISL_16033764	BA.1	561703	29881	99.93	2408
MGBR50466	EPI_ISL_16033765	BA.1	548205	29887	99.95	2347
MGBR50468	EPI_ISL_16033766	BA.1	527019	29870	99.89	2257
MGBR50477	EPI_ISL_16033767	BA.1.15	619226	29887	99.95	2649
MGBR50478	EPI_ISL_16033768	BA.1	719527	29861	99.86	3065
MGBR50480	EPI_ISL_16033769	BA.1	459994	29854	99.84	1944
MGBR50481	EPI_ISL_16033770	BA.1	470556	29848	99.82	2026
MGBR50484	EPI_ISL_16033771	BA.1.14.2	650788	29892	99.96	2764
MGBR50487	EPI_ISL_16033772	BA.1	515682	29892	99.96	2200
MGBR50488	EPI_ISL_16033773	BA.1.14.1	554219	29893	99.97	2342
MGBR50489	EPI_ISL_16033774	BA.1.1	138018	29839	99.79	610
MGBR50490	EPI_ISL_16033775	BA.1.1	582458	29882	99.93	2468
MGBR50491	EPI_ISL_16033776	BA.1	641026	29882	99.93	2711
MGBR50497	EPI_ISL_16033777	AY.99.2	482391	29894	99.97	2075
MGBR50498	EPI_ISL_16033778	AY.99.1	516336	29858	99.85	2210
MGBR50513	EPI_ISL_16033779	BA.1.1	490892	29885	99.94	2109
MGBR50517	EPI_ISL_16033780	BA.1.1	577629	29889	99.95	2443
MGBR50518	EPI_ISL_16033781	BA.1.14.1	566415	29876	99.91	2402
MGBR50533	EPI_ISL_16033782	BA.1	528344	29881	99.93	2244
MGBR50538	EPI_ISL_16033783	BA.1.14.1	466071	29851	99.83	1992
MGBR50539	EPI_ISL_16033784	BA.1	548451	29888	99.95	2353
MGBR50542	EPI_ISL_16033785	BA.1.1	595262	29888	99.95	2555
MGBR50543	EPI_ISL_16033786	BA.1.17	646871	29882	99.93	2769
MGBR50549	EPI_ISL_16033787	BA.1.14.1	484776	29872	99.90	2075
MTBR50001	EPI_ISL_16033788	BA.1.1	571211	29842	99.80	2429
PABR50022	EPI_ISL_16033789	BA.1.1	551923	29884	99.94	2369
PABR50023	EPI_ISL_16033790	BA.1.14.1	603101	29853	99.83	2580
PABR50024	EPI_ISL_16033791	BA.1.14.1	559497	29885	99.94	2391
PABR50025	EPI_ISL_16033792	BA.1.14.1	561751	29871	99.89	2395
PABR50027	EPI_ISL_16033793	BA.1.14.1	654563	29887	99.95	2810
PABR50028	EPI_ISL_16033794	BA.1.14.1	567820	29888	99.95	2421
PABR50029	EPI_ISL_16033795	BA.1	511645	29879	99.92	2195
PABR50030	EPI_ISL_16033796	BA.1	697841	29888	99.95	2969
PABR50031	EPI_ISL_16033797	BA.1.14.1	589709	29891	99.96	2513
PABR50032	EPI_ISL_16033798	AY.99.2	515545	29886	99.94	2233
PABR50033	EPI_ISL_16033799	BA.1.1	477840	29884	99.94	2064
PABR50056	EPI_ISL_16033800	AY.99.2	327931	29854	99.84	1402
PBBR50008	EPI_ISL_16033801	AY.99.2	486886	29899	99.99	2092
PEBR50004	EPI_ISL_16033802	AY.99.2	448899	29899	99.99	1931
PEBR50005	EPI_ISL_16033803	AY.99.2	462707	29883	99.93	1996
PEBR50006	EPI_ISL_16033804	AY.99.2	342821	29854	99.84	1471
PEBR50007	EPI_ISL_16033805	AY.99.2	495787	29879	99.92	2133
PEBR50008	EPI_ISL_16033806	AY.99.2	591672	29895	99.97	2537
PEBR50009	EPI_ISL_16033807	AY.99.2	428418	29900	99.99	1851
PEBR50010	EPI_ISL_16033808	BA.1	466351	29882	99.93	2009
PEBR50012	EPI_ISL_16033809	AY.99.2	570259	29896	99.98	2440
PEBR50013	EPI_ISL_16033810	AY.99.2	490120	29861	99.86	2096
PRBR50001	EPI_ISL_16033811	BA.1.1	423620	29852	99.83	1830
PRBR50002	EPI_ISL_16033812	BA.1	434495	29861	99.86	1866
PRBR50012	EPI_ISL_16033813	BA.1	411721	29879	99.92	1780
PRBR50013	EPI_ISL_16033814	BA.1.7	279136	28558	95.50	1181
RJBR50001	EPI_ISL_16033815	AY.99.1	549422	29893	99.97	2350
RJBR50005	EPI_ISL_16033816	BA.1.1	546697	29874	99.90	2336
RJBR50006	EPI_ISL_16033817	BA.1.14.1	524341	29887	99.95	2255
RJBR50034	EPI_ISL_16033818	BA.1	447458	29886	99.94	1939
RJBR50035	EPI_ISL_16033819	BA.1.1	514878	29848	99.82	2216
RJBR50036	EPI_ISL_16033820	BA.1	596031	29888	99.95	2513
RJBR50052	EPI_ISL_16033821	BA.1.15	521832	29886	99.94	2255
RJBR50075	EPI_ISL_16033822	BA.1.15	506646	29846	99.81	2148
RJBR50076	EPI_ISL_16033823	BA.1.14.1	517252	29891	99.96	2208
RJBR50077	EPI_ISL_16033824	BA.1	534473	29882	99.93	2263
RJBR50078	EPI_ISL_16033825	BA.1.1	576605	29892	99.96	2441
RJBR50080	EPI_ISL_16033826	BA.1	561556	29867	99.88	2395
RJBR50081	EPI_ISL_16033827	BA.1.1	508024	29887	99.95	2171
RJBR50082	EPI_ISL_16033828	BA.1.14.1	569999	29880	99.92	2438
RJBR50083	EPI_ISL_16033829	BA.1.14.1	524915	29884	99.94	2251
RJBR50084	EPI_ISL_16033830	BA.1	544921	29881	99.93	2335
RJBR50085	EPI_ISL_16033831	BA.1.15	597867	29888	99.95	2562
RJBR50086	EPI_ISL_16033832	BA.1.1	572126	29889	99.95	2463
RJBR50100	EPI_ISL_16033833	BA.1	505674	29886	99.94	2151
RJBR50101	EPI_ISL_16033834	BA.1.15	584968	29881	99.93	2496
RJBR50102	EPI_ISL_16033835	BA.1	464299	29881	99.93	1972
RJBR50103	EPI_ISL_16033836	BA.1.1	641845	29889	99.95	2726
RJBR50104	EPI_ISL_16033837	BA.1	582669	29847	99.81	2471
ROBR50008	EPI_ISL_16033838	AY.99.2	510861	29856	99.84	2182
ROBR50009	EPI_ISL_16033839	AY.99.2	396987	29864	99.87	1714
ROBR50010	EPI_ISL_16033840	AY.43	375093	29856	99.84	1626
ROBR50011	EPI_ISL_16033841	AY.99.2	583910	29897	99.98	2501
ROBR50012	EPI_ISL_16033842	BA.1	592115	29892	99.96	2522
ROBR50013	EPI_ISL_16033843	BA.1.1	533633	29883	99.93	2289
RSBR50014	EPI_ISL_16033844	BA.1.17.2	404773	29888	99.95	1718
RSBR50015	EPI_ISL_16033845	BA.1.17.2	432576	29887	99.95	1840
RSBR50017	EPI_ISL_16033846	AY.101	502331	29895	99.97	2153
RSBR50022	EPI_ISL_16033847	BA.1	378029	29872	99.90	1611
RSBR50025	EPI_ISL_16033848	AY.99.2	480884	29896	99.98	2070
RSBR50026	EPI_ISL_16033849	AY.99.2	572783	29895	99.97	2459
RSBR50027	EPI_ISL_16033850	AY.99.2	523223	29886	99.94	2241
RSBR50028	EPI_ISL_16033851	AY.99.2	562496	29899	99.99	2421
RSBR50029	EPI_ISL_16033852	AY.99.2	522875	29898	99.98	2238
RSBR50038	EPI_ISL_16033853	BA.1.1	419866	29888	99.95	1878
SPBR50002	EPI_ISL_16033854	BA.1.15	386043	29872	99.90	1662
SPBR50004	EPI_ISL_16033855	BA.1.14.1	551947	29887	99.95	2346
SPBR50005	EPI_ISL_16033856	AY.34.1.1	453028	29896	99.98	1953
SPBR50026	EPI_ISL_16033857	BA.1	140637	29832	99.76	617
SPBR50038	EPI_ISL_16033858	BA.1	513568	29880	99.92	2190
SPBR50040	EPI_ISL_16033859	BA.1.1	497944	29891	99.96	2141
SPBR50050	EPI_ISL_16033860	BA.1	488000	29846	99.81	2078
SPBR50053	EPI_ISL_16033861	BA.1	386011	29858	99.85	1647
SPBR50054	EPI_ISL_16033862	BA.1	544377	29876	99.91	2312
SPBR50055	EPI_ISL_16033863	BA.1.1	489518	29874	99.90	2079
SPBR50056	EPI_ISL_16033864	BA.1.1	461272	29864	99.87	1961
SPBR50058	EPI_ISL_16033865	BA.1	583768	29883	99.93	2488
SPBR50059	EPI_ISL_16033866	BA.1	628360	29891	99.96	2692
SPBR50060	EPI_ISL_16033867	BA.1	589267	29891	99.96	2531
SPBR50062	EPI_ISL_16033868	BA.1.14	517903	29878	99.92	2207
SPBR50064	EPI_ISL_16033869	BA.1	600044	29850	99.82	2562
SPBR50065	EPI_ISL_16033870	BA.1	419219	29881	99.93	1811
SPBR50066	EPI_ISL_16033871	BA.1.15	434859	29858	99.85	1875
SPBR50068	EPI_ISL_16033872	BA.1	396348	29871	99.89	1712
SPBR50101	EPI_ISL_16033873	BA.1	473490	29887	99.95	2019
SPBR50102	EPI_ISL_16033874	BA.1	515841	29885	99.94	2193
SPBR50103	EPI_ISL_16033875	BA.1	566162	29849	99.82	2405
SPBR50104	EPI_ISL_16033876	BA.1.1	396593	29855	99.84	1708
SPBR50105	EPI_ISL_16033877	BA.1.15	453202	29863	99.87	1939
SPBR50106	EPI_ISL_16033878	BA.1	464129	29886	99.94	1999
SPBR50107	EPI_ISL_16033879	AY.99.2	554319	29888	99.95	2396
SPBR50108	EPI_ISL_16033880	BA.1	342559	29683	99.26	1458
SPBR50109	EPI_ISL_16033881	BA.1.1	584773	29880	99.92	2494
SPBR50110	EPI_ISL_16033882	BA.1	489056	29844	99.80	2076
SPBR50111	EPI_ISL_16033883	BA.1.1	505468	29889	99.95	2179
SPBR50112	EPI_ISL_16033884	BA.1	509665	29881	99.93	2200
SPBR50113	EPI_ISL_16033885	BA.1.14	543468	29893	99.97	2331
SPBR50114	EPI_ISL_16033886	BA.1	371325	29873	99.90	1594
SPBR50115	EPI_ISL_16033887	BA.1	456711	29879	99.92	1964
SPBR50116	EPI_ISL_16033888	BA.1	466311	29871	99.89	2007
SPBR50117	EPI_ISL_16033889	BA.1.14.2	453632	29884	99.94	1951
SPBR50118	EPI_ISL_16033890	BA.1	511765	29892	99.96	2201
SPBR50119	EPI_ISL_16033891	BA.1	495333	29892	99.96	2122
SPBR50120	EPI_ISL_16033892	BA.1	524644	29883	99.93	2261
SPBR50121	EPI_ISL_16033893	BA.1.1	452617	29882	99.93	1943
SPBR50122	EPI_ISL_16033894	BA.1	505796	29884	99.94	2166
SPBR50123	EPI_ISL_16033895	BA.1	498672	29884	99.94	2142
SPBR50124	EPI_ISL_16033896	BA.1.1	567444	29867	99.88	2441
SPBR50125	EPI_ISL_16033897	BA.1	687639	29887	99.95	2942
SPBR50126	EPI_ISL_16033898	BA.1	616330	29884	99.94	2646
SPBR50127	EPI_ISL_16033899	BA.1	447748	29886	99.94	1927
SPBR50128	EPI_ISL_16033900	BA.1.7	481362	29883	99.93	2059
SPBR50129	EPI_ISL_16033901	BA.1	543510	29883	99.93	2334
SPBR50130	EPI_ISL_16033902	BA.1	166023	29855	99.84	756
SPBR50131	EPI_ISL_16033903	BA.1.1	506606	29887	99.95	2165
SPBR50132	EPI_ISL_16033904	BA.1.14.1	443428	29875	99.91	1904
SPBR50133	EPI_ISL_16033905	BA.1	558027	29890	99.96	2395
SPBR50134	EPI_ISL_16033906	BA.1	493797	29892	99.96	2117
SPBR50161	EPI_ISL_16033907	AY.34.1.1	548264	29890	99.96	2361
SPBR50162	EPI_ISL_16033908	AY.43.7	501333	29888	99.95	2160
SPBR50163	EPI_ISL_16033909	BA.1	549270	29881	99.93	2360
SPBR50164	EPI_ISL_16033910	BA.1.1.14	496311	29871	99.89	2127
SPBR50165	EPI_ISL_16033911	BA.1	429559	29886	99.94	1835
SPBR50166	EPI_ISL_16033912	BA.1	537595	29886	99.94	2310
SPBR50167	EPI_ISL_16033913	BA.1	428984	29889	99.95	1849
SPBR50168	EPI_ISL_16033914	BA.1.14	535169	29881	99.93	2296
SPBR50169	EPI_ISL_16033915	BA.1.1	415264	29878	99.92	1785
SPBR50170	EPI_ISL_16033916	BA.1.14	223837	29887	99.95	970
SPBR50173	EPI_ISL_16033917	BA.1.1	550064	29882	99.93	2351
SPBR50174	EPI_ISL_16033918	BA.1.14.1	320661	29518	98.71	1357
SPBR50183	EPI_ISL_16033919	BA.1.1	540789	29897	99.98	2330
SPBR50184	EPI_ISL_16033920	BA.1	493853	29880	99.92	2126
TOBR50002	EPI_ISL_16033921	BA.1.14.1	458122	29892	99.96	1977
TOBR50003	EPI_ISL_16033922	BA.1.14.1	266614	29227	97.74	1137
TOBR50004	EPI_ISL_16033923	BA.1.14.1	340093	29885	99.94	1463
TOBR50019	EPI_ISL_16033924	BA.1	546983	29884	99.94	2353
TOBR50020	EPI_ISL_16033925	BA.1	515065	29884	99.94	2207
TOBR50021	EPI_ISL_16033926	BA.1	628584	29890	99.96	2691
RSBR00001	EPI_ISL_16033927	AY.3	323601	29396	98.30	1363
RSBR00004	EPI_ISL_16033928	BA.1.14	272102	29544	98.80	1178
RSBR00006	EPI_ISL_16033929	BA.1.21	273546	29503	98.66	1174
RSBR00007	EPI_ISL_16033930	BA.1	433846	29846	99.81	1851
RSBR00008	EPI_ISL_16033931	BA.1.18	472722	29805	99.67	2024
RSBR00009	EPI_ISL_16033932	BA.1.1	439503	29863	99.87	1886
RSBR00010	EPI_ISL_16033933	BA.1.1	564704	29850	99.82	2420
RSBR00011	EPI_ISL_16033934	BA.1.1	486703	29841	99.79	2085
RSBR00012	EPI_ISL_16033935	BA.1.17.2	423100	29823	99.73	1810
RSBR00013	EPI_ISL_16033936	BA.1.1	395048	29488	98.61	1674
RSBR00014	EPI_ISL_16033937	BA.1.1.14	668493	29884	99.94	2872
RSBR00015	EPI_ISL_16033938	BA.1.9	495201	29845	99.81	2131
RSBR00016	EPI_ISL_16033939	BA.1.1.14	406059	29741	99.46	1751
RSBR00017	EPI_ISL_16033940	BA.1.1.14	480553	29372	98.22	2055
RSBR00018	EPI_ISL_16033941	BA.1.15	258162	29118	97.37	1103
RSBR00019	EPI_ISL_16033942	BA.1.17.2	205326	28724	96.06	875
RSBR00020	EPI_ISL_16033943	BA.1.1	320053	28682	95.92	1355
RSBR00021	EPI_ISL_16033944	BA.1.18	660386	29812	99.70	2827
RSBR00022	EPI_ISL_16033945	BA.1	56179	28429	95.07	250
RSBR00023	EPI_ISL_16033946	BA.1	111351	29741	99.46	510
RSBR00024	EPI_ISL_16033947	BA.1	75101	29811	99.69	338
RSBR00025	EPI_ISL_16033948	BA.1.1	239323	28836	96.43	1026
RSBR00026	EPI_ISL_16033949	BA.1	65704	29282	97.92	298
RSBR00027	EPI_ISL_16033950	BA.1	115896	29728	99.41	530
RSBR00028	EPI_ISL_16033951	BA.1.1	96559	29415	98.37	438
RSBR00029	EPI_ISL_16033952	BA.1.15	480079	29816	99.71	2054
RSBR00030	EPI_ISL_16033953	BA.1.1	507811	29859	99.85	2187
RSBR00031	EPI_ISL_16033954	BA.1.1	457507	29771	99.56	1958
RSBR00033	EPI_ISL_16033955	BA.1.1	618426	29882	99.93	2677
RSBR00034	EPI_ISL_16033956	BA.1	499001	29843	99.80	2133
RSBR00035	EPI_ISL_16033957	BA.1.14	407693	29803	99.67	1755
RSBR00037	EPI_ISL_16033958	BA.1.1	610595	29880	99.92	2627
RSBR00038	EPI_ISL_16033959	BA.1.1.14	397789	29782	99.60	1710
RSBR00039	EPI_ISL_16033960	BA.1.1	332690	29156	97.50	1407
RSBR00040	EPI_ISL_16033961	BA.1.15	627746	29877	99.91	2703
RSBR00041	EPI_ISL_16033962	BA.1	429615	29441	98.45	1830
RSBR00042	EPI_ISL_16033963	BA.1.1	557157	29819	99.72	2394
RSBR00043	EPI_ISL_16033964	BA.1.1	570178	29869	99.89	2462
RSBR00044	EPI_ISL_16033965	BA.1.14.2	534764	29850	99.82	2295
RSBR00045	EPI_ISL_16033966	BA.1.14	492752	29846	99.81	2128
RSBR00046	EPI_ISL_16033967	BA.1.14	361395	29467	98.54	1547
RSBR00047	EPI_ISL_16033968	BA.1.18	455277	29804	99.67	1960
RSBR00048	EPI_ISL_16033969	BA.1.1	521807	29812	99.70	2240
RSBR00049	EPI_ISL_16033970	BA.1.9	491870	29846	99.81	2129
RSBR00051	EPI_ISL_16033971	BA.1.1	474291	29867	99.88	2042
RSBR00052	EPI_ISL_16033972	BA.1.1	290142	29279	97.91	1232
RSBR00053	EPI_ISL_16033973	BA.1.1	539842	29877	99.91	2332
RSBR00054	EPI_ISL_16033974	BA.1.1	425451	29847	99.81	1830
RSBR00055	EPI_ISL_16033975	BA.1.9	420567	29841	99.79	1810
RSBR00056	EPI_ISL_16033976	BA.1.15	208953	29837	99.78	898
RSBR00057	EPI_ISL_16033977	BA.1.1	451449	29845	99.81	1950
RSBR00058	EPI_ISL_16033978	BA.1	364083	29846	99.81	1563
RSBR00059	EPI_ISL_16033979	BA.1.1	326008	29844	99.80	1404
RSBR00060	EPI_ISL_16033980	BA.1.1	559623	29865	99.87	2405
RSBR00061	EPI_ISL_16033981	BA.1	310772	29004	96.99	1331
RSBR00062	EPI_ISL_16033982	BA.1	353624	29714	99.37	1510
RSBR00063	EPI_ISL_16033983	BA.1.1	602293	29887	99.95	2592
RSBR00064	EPI_ISL_16033984	BA.1.1	451269	29848	99.82	1944
RSBR00065	EPI_ISL_16033985	BA.1.17.2	494207	29843	99.80	2121
RSBR00066	EPI_ISL_16033986	BA.1.1.14	588252	29846	99.81	2530
RSBR00067	EPI_ISL_16033987	BA.1.1	555097	29840	99.79	2386
RSBR00068	EPI_ISL_16033988	BA.1	351870	29379	98.25	1495
RSBR00069	EPI_ISL_16033989	BA.1.17.2	402210	29847	99.81	1719
RSBR00070	EPI_ISL_16033990	BA.1.1	477732	29846	99.81	2046
RSBR00072	EPI_ISL_16033991	BA.1	251416	29196	97.64	1080
RSBR00073	EPI_ISL_16033992	BA.1	376425	29704	99.33	1617
RSBR00074	EPI_ISL_16033993	BA.1.1	196877	29276	97.90	851
RSBR00076	EPI_ISL_16033994	BA.1	325283	29839	99.79	1423
RSBR00077	EPI_ISL_16033995	BA.1.1	408037	29785	99.61	1757
RSBR00078	EPI_ISL_16033996	BA.1.1	567639	29887	99.95	2442
RSBR00080	EPI_ISL_16033997	BA.1	531946	29842	99.80	2283
RSBR00081	EPI_ISL_16033998	BA.1.15	412114	29593	98.96	1757
RSBR00082	EPI_ISL_16033999	BA.1.14.2	407787	29594	98.97	1738
RSBR00083	EPI_ISL_16034000	BA.1.1.14	407051	29466	98.54	1739
RSBR00084	EPI_ISL_16034001	BA.1.1	445722	29649	99.15	1911
RSBR00085	EPI_ISL_16034002	BA.1.1	419718	29876	99.91	1819
RSBR00086	EPI_ISL_16034003	BA.1.9	623884	29849	99.82	2685
RSBR00088	EPI_ISL_16034004	BA.1.14.2	621953	29887	99.95	2674
RSBR00090	EPI_ISL_16034005	BA.1.1	434965	29851	99.83	1864
RSBR00092	EPI_ISL_16034006	BA.1.1	442112	29807	99.68	1918
RSBR00093	EPI_ISL_16034007	BA.1.1	367049	29612	99.03	1582
RSBR00094	EPI_ISL_16034008	BA.1.1	454504	29839	99.79	1968
RSBR00095	EPI_ISL_16034009	BA.1.17.2	448946	29781	99.59	1943
RSBR00096	EPI_ISL_16034010	BA.1.1.14	499087	29876	99.91	2164
RSBR00097	EPI_ISL_16034011	BA.1.1	456545	29867	99.88	1987
RSBR00098	EPI_ISL_16034012	BA.1	427939	29751	99.49	1857
RSBR00099	EPI_ISL_16034013	BA.1.1	474940	29885	99.94	2061
RSBR00100	EPI_ISL_16034014	BA.1.14.2	562479	29888	99.95	2443
RSBR00101	EPI_ISL_16034015	BA.1.1.14	451995	29865	99.87	1967
RSBR00102	EPI_ISL_16034016	BA.1.1	514905	29878	99.92	2226
RSBR00103	EPI_ISL_16034017	BA.1.1	466676	29866	99.88	2021
RSBR00104	EPI_ISL_16034018	BA.1.1	292086	29178	97.58	1265
RSBR00105	EPI_ISL_16034019	BA.1.1	455524	29885	99.94	1986
RSBR00106	EPI_ISL_16034020	BA.1.1	518237	29880	99.92	2249
RSBR00107	EPI_ISL_16034021	BA.1.1.14	412514	29875	99.91	1793
RSBR00108	EPI_ISL_16034022	BA.1.1	522228	29885	99.94	2256
RSBR00111	EPI_ISL_16034023	BA.1.14.1	248326	29841	99.79	1080
RSBR00112	EPI_ISL_16034024	BA.1.1	364402	29552	98.83	1577
RSBR00113	EPI_ISL_16034025	BA.1.15	449447	29790	99.62	1942
RSBR00114	EPI_ISL_16034026	BA.1.1	401182	29838	99.78	1725
RSBR00115	EPI_ISL_16034027	BA.1	491128	29882	99.93	2127
RSBR00116	EPI_ISL_16034028	BA.1.1	365791	29836	99.78	1599
RSBR00117	EPI_ISL_16034029	BA.1.1.14	524402	29875	99.91	2277
RSBR00118	EPI_ISL_16034030	BA.1	482211	29865	99.87	2096
RSBR00119	EPI_ISL_16034031	BA.1.15	387812	29846	99.81	1682
RSBR00120	EPI_ISL_16034032	BA.1	517188	29837	99.78	2239
RSBR00121	EPI_ISL_16034033	BA.1.15	265730	29886	99.94	1148
RSBR00122	EPI_ISL_16034034	BA.1	434703	29680	99.25	1867
RSBR00123	EPI_ISL_16034035	BA.1.1	392134	29844	99.80	1697
RSBR00124	EPI_ISL_16034036	BA.1.1	492580	29855	99.84	2135
RSBR00125	EPI_ISL_16034037	BA.1.19	498354	29873	99.90	2166
RSBR00126	EPI_ISL_16034038	BA.1.1	379422	29852	99.83	1636
RSBR00127	EPI_ISL_16034039	BA.1.1	256325	28503	95.32	1101
RSBR00128	EPI_ISL_16034040	BA.1.1	324173	28942	96.79	1385
RSBR00129	EPI_ISL_16034041	BA.1.1	443238	29843	99.80	1919
RSBR00130	EPI_ISL_16034042	BA.1.1	343423	29787	99.61	1482
RSBR00131	EPI_ISL_16034043	BA.1.14.1	467069	29844	99.80	2021
RSBR00132	EPI_ISL_16034044	BA.1.14	251550	29850	99.82	1093
RSBR00133	EPI_ISL_16034045	BA.1	547316	29856	99.84	2365
RSBR00134	EPI_ISL_16034046	BA.1.1	384776	29841	99.79	1671
RSBR00135	EPI_ISL_16034047	BA.1.1	242130	28842	96.45	1037
RSBR00136	EPI_ISL_16034048	BA.1.1	528177	29640	99.12	2278
RSBR00137	EPI_ISL_16034049	BA.1.1	503038	29839	99.79	2162
RSBR00138	EPI_ISL_16034050	BA.1.14	567665	29859	99.85	2449
RSBR00139	EPI_ISL_16034051	BA.1.1	278304	28742	96.12	1187
RSBR00140	EPI_ISL_16034052	BA.1.1	491545	29758	99.52	2120
RSBR00141	EPI_ISL_16034053	BA.1.15	394147	29654	99.17	1701
RSBR00142	EPI_ISL_16034054	BA.1.1	416925	29749	99.48	1802
RSBR00143	EPI_ISL_16034055	BA.1.15	438448	29843	99.80	1896
RSBR00144	EPI_ISL_16034056	BA.1.1	481196	29467	98.54	2066
RSBR00145	EPI_ISL_16034057	BA.2	470398	29857	99.85	2045
RSBR00146	EPI_ISL_16034058	BA.2	344139	29852	99.83	1483
RSBR00147	EPI_ISL_16034059	XAG	576470	29862	99.86	2503
RSBR00148	EPI_ISL_16034060	BA.2	574223	29870	99.89	2490
RSBR00149	EPI_ISL_16034061	XAG	253096	29855	99.84	1103
RSBR00150	EPI_ISL_16034062	BA.1.1	487145	29664	99.20	2102
RSBR00151	EPI_ISL_16034063	BA.1.1.14	417647	29880	99.92	1814
RSBR00152	EPI_ISL_16034064	BA.1.1.14	610406	29886	99.94	2623
RSBR00153	EPI_ISL_16034065	BA.2	376868	29852	99.83	1639
RSBR00154	EPI_ISL_16034066	BA.2	531351	29820	99.72	2279
RSBR00155	EPI_ISL_16034067	XAG	579778	29854	99.84	2503
RSBR00157	EPI_ISL_16034068	BA.2	461556	29875	99.91	1976
RSBR00159	EPI_ISL_16034069	BA.2	415661	29154	97.50	1777
RSBR00160	EPI_ISL_16034070	BA.2	553294	29848	99.82	2380
RSBR00161	EPI_ISL_16034071	BA.2	500970	29851	99.83	2164
RSBR00162	EPI_ISL_16034072	BA.2	539377	29859	99.85	2330
RSBR00163	EPI_ISL_16034073	BA.2	226728	29835	99.77	1001
RSBR00164	EPI_ISL_16034074	BA.2	614641	29869	99.89	2657
RSBR00165	EPI_ISL_16034075	BA.2	555969	29862	99.86	2403
RSBR00166	EPI_ISL_16034076	BA.2	527951	29858	99.85	2290
RSBR00167	EPI_ISL_16034077	XAG	539014	29873	99.90	2341
RSBR00168	EPI_ISL_16034078	BA.2	565004	29857	99.85	2445
RSBR00169	EPI_ISL_16034079	BA.2	474151	29857	99.85	2051
RSBR00170	EPI_ISL_16034080	BA.1.1	520851	29877	99.91	2249
RSBR00171	EPI_ISL_16034081	BA.1.1	590739	29877	99.91	2552
RSBR00172	EPI_ISL_16034082	BA.2	596573	29855	99.84	2584
RSBR00173	EPI_ISL_16034083	BA.2	584608	29853	99.83	2536
RSBR00174	EPI_ISL_16034084	BA.2	366943	29162	97.52	1561
RSBR00175	EPI_ISL_16034085	BA.2	564866	29867	99.88	2463
RSBR00176	EPI_ISL_16034086	XAG	727188	29846	99.81	3148
RSBR00177	EPI_ISL_16034087	BA.2	496820	29859	99.85	2142
RSBR00178	EPI_ISL_16034088	BA.1.1	662049	29874	99.90	2855
RSBR00179	EPI_ISL_16034089	XAG	675935	29857	99.85	2925
RSBR00180	EPI_ISL_16034090	XAG	593782	29853	99.83	2586
RSBR00181	EPI_ISL_16034091	BA.2	674395	29855	99.84	2930
RSBR00182	EPI_ISL_16034092	BA.2	586548	29860	99.86	2532
RSBR00183	EPI_ISL_16034093	BA.1.1	636551	29888	99.95	2746
RSBR00184	EPI_ISL_16034094	BA.2	610887	29869	99.89	2613
RSBR00185	EPI_ISL_16034095	BA.2	467293	29777	99.58	2018
RSBR00186	EPI_ISL_16034096	BA.1.1	598619	29882	99.93	2569
RSBR00187	EPI_ISL_16034097	BA.2	571071	29850	99.82	2474
RSBR00188	EPI_ISL_16034098	BA.1.1	423487	29881	99.93	1831
RSBR00189	EPI_ISL_16034099	BA.2	270827	29863	99.87	1182
RSBR00190	EPI_ISL_16034100	BA.2	562143	29858	99.85	2429
RSBR10001	EPI_ISL_16034101	BA.1.1	526971	29845	99.81	2311
RSBR10002	EPI_ISL_16034102	BA.1	570306	29878	99.92	2504
RSBR10003	EPI_ISL_16034103	BA.1	477910	29885	99.94	2089
RSBR10004	EPI_ISL_16034104	BA.1	584983	29882	99.93	2565
RSBR10005	EPI_ISL_16034105	BA.1	447137	29850	99.82	1959
RSBR10006	EPI_ISL_16034106	BA.1	476204	29863	99.87	2086
RSBR10007	EPI_ISL_16034107	BA.1.1	557077	29889	99.95	2440
RSBR10009	EPI_ISL_16034108	BA.1.1	470940	29864	99.87	2068
RSBR10011	EPI_ISL_16034109	BA.1.14.2	487451	29884	99.94	2143
RSBR10012	EPI_ISL_16034110	BA.2	483401	29820	99.72	2119
RSBR10013	EPI_ISL_16034111	BA.2	510106	29860	99.86	2230
[truncated: 175 more rows]
