# Supplementary material for: The Omicron Lineages BA.1 and BA.2 (Betacoronavirus SARS-CoV-2) Have Repeatedly Entered Brazil through a Single Dispersal Hub
Source: Viruses. 2023 Mar 30;15(4):888. doi: 10.3390/v15040888 (PMC10146814; doi:10.3390/v15040888)
Supplement: Supplementary file 1 [file viruses-15-00888-s001.zip › TableS2.xlsx]

## Sheet: Sheet1
Table S2. Posterior values for Markov Jump Counts and mean dispersal rates obtained for BA.1 and BA.2 in both proportional and uniform datasets
		Mean of Markov Jump counts				Mean dispersal rates
		BA.1		BA.2		BA.1		BA.2
Origin	Destination	Proportional	Uniform	Proportional	Uniform	Proportional	Uniform	Proportional	Uniform
AC	AL	0	0.0002222	-	-	1.016	1.056	-	-
AC	AM	0	0.0003333	-	-	1.109	1.133	-	-
AC	AP	0	0.0004444	-	-	1.12	1.095	-	-
AC	BA	0.0006287	0.001111	-	-	1.481	1.075	-	-
AC	CE	0.002515	0.002889	-	-	0.819	0.996	-	-
AC	DF	0.0009431	1.273	-	-	1.315	0.39	-	-
AC	ES	0	0.001222	-	-	0.969	1.179	-	-
AC	GO	0.001257	0.0004444	-	-	0.926	1.064	-	-
AC	International	0.03332	0.03366	-	-	1.123	1.058	-	-
AC	MA	0	0.0008888	-	-	0.611	1.136	-	-
AC	MG	0.0006287	0.004222	-	-	1.331	1.212	-	-
AC	MS	0	0.001111	-	-	0.862	1.178	-	-
AC	MT	0.0006287	0.0002222	-	-	1.215	1.18	-	-
AC	PA	0	0	-	-	1.218	1.146	-	-
AC	PB	0.001257	0	-	-	1.355	1.058	-	-
AC	PE	0.002829	0.0006666	-	-	1.302	1.102	-	-
AC	PI	0	0	-	-	1.379	1.131	-	-
AC	PR	0	0.001222	-	-	1.151	1.233	-	-
AC	RJ	0	0.626	-	-	1.424	0.629	-	-
AC	RN	0	0.008221	-	-	1.241	0.999	-	-
AC	RO	2.637	6.148	-	-	0.59	0.763	-	-
AC	RR	0	0.0001111	-	-	0.933	1.152	-	-
AC	RS	0	0.0003333	-	-	0.803	1.19	-	-
AC	SC	0.0003144	0.01178	-	-	1.765	1.205	-	-
AC	SE	0	0.0007777	-	-	1.504	1.204	-	-
AC	SP	2.211	0.199	-	-	0.548	1.087	-	-
AC	TO	0	0.01789	-	-	1.054	1.061	-	-
AL	AC	0	0.0009999	0	0	1.063	1.313	-	-
AL	AM	0	2.416	0.001111	0.0001111	1.295	0.394	1.014	1.213
AL	AP	0	0.01866	-	-	0.871	1.199	-	-
AL	BA	0.003458	0.87	0.0003333	0	1.037	0.721	1.078	1.512
AL	CE	0	0.05966	-	-	1.273	1.174	-	-
AL	DF	0.001886	0.08477	0.0007777	0.0007777	1.299	1.219	1.079	1.31
AL	ES	0.001257	0.01411	0.0001111	0	1.118	0.932	0.928	1.149
AL	GO	0.0003144	0.007333	0.0001111	0.0004444	0.793	1	0.939	0.91
AL	International	0.01132	0.06988	0.004222	0.0001111	1.28	1.062	1.043	1.066
AL	MA	0.001257	0.007555	0.003333	0.006888	1.58	1.138	1.163	1.261
AL	MG	0.004401	0.03744	0.002111	0.002889	0.846	0.913	1.065	0.89
AL	MS	0	0	0.0008888	0.003444	0.644	1.287	0.905	1.019
AL	MT	0.002201	0.002666	0.001333	0.0005555	1.219	1.239	1.168	0.73
AL	PA	0.0009431	0.794	-	-	1.187	0.632	-	-
AL	PB	0	0.008221	0.0001111	0	1.344	1.118	0.924	0.751
AL	PE	0.34	5.75	0	0.001222	1.084	0.741	1.168	0.722
AL	PI	0.0006287	0.003666	-	-	1.028	1.176	-	-
AL	PR	0.00503	0.008555	0.0003333	0.0004444	0.944	1.2	1.003	1.531
AL	RJ	0.004401	0.0008888	0.0002222	0.0004444	1.504	1.115	1.016	0.997
AL	RN	0.001257	0.003666	0.0003333	0.0001111	1.367	1.318	1.224	0.997
AL	RO	0.004087	0.001444	-	-	1.097	1.21	-	-
AL	RR	0.006916	0.006333	-	-	0.685	1.201	-	-
AL	RS	0.001886	0.005222	0.0001111	0.0005555	1.106	1.048	1.083	1.443
AL	SC	0.002201	0.04444	0.0002222	0.001889	1.073	1.243	1.026	0.965
AL	SE	0.003772	0.002	-	-	0.67	1.205	-	-
AL	SP	0.377	0.834	0.0001111	0.0006666	0.922	0.866	1.419	1.382
AL	TO	0	0.17	0.014	0.003777	1.406	1.005	1.115	1.149
AM	AC	0.02672	0.003888	-	-	1.217	1.122	-	-
AM	AL	0.001572	0.003444	0.0004444	0.0005555	1.421	1.123	1.342	1.258
AM	AP	0	2.338	-	-	1.582	0.392	-	-
AM	BA	0.0003144	0.01544	0.0002222	0.0001111	0.626	1.038	1.11	0.693
AM	CE	0.003144	0.05366	-	-	0.946	1.177	-	-
AM	DF	0.0006287	0.031	0	0.006222	1.458	1.025	1.257	1.114
AM	ES	0.001257	0.04611	0.0002222	0	1.37	0.94	1.504	0.935
AM	GO	0.0006287	0.03389	0	0.001778	1.258	1.104	1.333	0.707
AM	International	5.265	1.463	0.008888	0.0007777	0.97	0.757	0.75	0.98
AM	MA	0.0003144	0.003222	0.003111	0.01033	1.313	1.099	0.87	1.143
AM	MG	0.001886	0.002222	0	0.003111	1.423	1.143	0.896	1.486
AM	MS	0.002515	0.0004444	0.0009999	0.0002222	1.054	1.208	1.153	0.771
AM	MT	0	0.0003333	0.005888	0.001111	1.286	1.034	0.909	0.835
AM	PA	0	0.02378	-	-	1.184	1.141	-	-
AM	PB	0.001257	0.01033	0.0001111	0	0.922	1.16	1.137	1.273
AM	PE	0.0006287	0.06477	0.001555	0.0005555	0.975	0.935	1.137	1.026
AM	PI	0.001572	0.0007777	-	-	1.169	1.167	-	-
AM	PR	0.0003144	0.005222	0.0002222	0.001111	1.171	0.974	1.297	0.807
AM	RJ	0.02704	0.004999	0	0.0003333	1.063	1.104	0.911	1.169
AM	RN	0	0.003888	0.0004444	0.0003333	0.709	1.179	1.308	1.345
AM	RO	0.511	3.045	-	-	0.943	0.596	-	-
AM	RR	0.0003144	1.452	-	-	0.904	0.561	-	-
AM	RS	0.06885	0.01267	0	0.001555	1.367	1.151	1.004	1.411
AM	SC	0.0003144	0.01711	0.0002222	0.0006666	1.25	1.043	0.752	1.165
AM	SE	0	0.005666	-	-	1.128	1.105	-	-
AM	SP	0.03238	0.317	0.0004444	0.0001111	1.003	1.002	0.875	1.032
AM	TO	0.0009431	0.306	0.005333	0.001444	1.166	1.025	1.041	1.505
AP	AC	0.0006287	0.0004444	-	-	0.714	1.152	-	-
AP	AL	0	0.0003333	-	-	0.976	1.167	-	-
AP	AM	0	0.0002222	-	-	1.216	1.215	-	-
AP	BA	0	0.0009999	-	-	1.118	1.201	-	-
AP	CE	0	0.01444	-	-	1.204	1.19	-	-
AP	DF	0	0.002777	-	-	1.353	1.13	-	-
AP	ES	0.0006287	0.0009999	-	-	1.116	1.141	-	-
AP	GO	0.0006287	0.0003333	-	-	1.111	1.071	-	-
AP	International	0	0.01544	-	-	0.84	1.323	-	-
AP	MA	0.0006287	0.001555	-	-	1.057	1.152	-	-
AP	MG	0.0003144	0.0003333	-	-	1.247	1.164	-	-
AP	MS	0	0	-	-	1.141	1.362	-	-
AP	MT	0.0003144	0.0001111	-	-	0.816	1.22	-	-
AP	PA	0.007545	2.071	-	-	1.25	0.416	-	-
AP	PB	0	0.0007777	-	-	1.076	1.148	-	-
AP	PE	0	0.0001111	-	-	1.169	1.155	-	-
AP	PI	0	0.0002222	-	-	1.515	1.019	-	-
AP	PR	0	0.0006666	-	-	1.132	1.071	-	-
AP	RJ	0.0003144	0.0006666	-	-	0.975	1.08	-	-
AP	RN	0	0.002111	-	-	1.145	1.27	-	-
AP	RO	0	0.002111	-	-	1.143	1.207	-	-
AP	RR	0.0006287	0.01067	-	-	1.081	1.12	-	-
AP	RS	0	0.0003333	-	-	0.968	1.219	-	-
AP	SC	0	0	-	-	0.802	1.163	-	-
AP	SE	0.0009431	0.0004444	-	-	1.022	1.196	-	-
AP	SP	0.0009431	0.004444	-	-	0.619	1.185	-	-
AP	TO	0	0.02777	-	-	1.288	1.028	-	-
BA	AC	0.07513	0.002889	-	-	0.959	1.147	-	-
BA	AL	0.0745	0.02777	0.002777	0.01222	0.683	1.054	0.935	0.981
BA	AM	0.01383	0.004555	0.02555	0.0009999	1.216	1.194	1.064	1.102
BA	AP	0	0.007888	-	-	1.15	1.093	-	-
BA	CE	0.001886	0.03044	-	-	1.134	1.221	-	-
BA	DF	0.11	0.265	0.0009999	0.007555	1.243	1.105	0.942	1.334
BA	ES	0.0132	0.02389	0.002	0.003777	1.166	0.988	0.983	1.051
BA	GO	0.153	0.004777	0.006999	0.003555	1.107	1.18	1.258	0.713
BA	International	2.738	0.127	0.002889	0.0005555	0.883	1.05	0.983	1.236
BA	MA	0.008488	0.02378	0.03677	0.003333	1.589	1.059	0.852	0.953
BA	MG	0.01195	0.04322	0.006999	0.0931	0.826	1.048	0.979	0.766
BA	MS	0.285	0.251	0.01211	0.001555	1.067	0.92	0.921	1.275
BA	MT	0.0009431	0.001889	-	-	1.058	1.111	-	-
BA	PA	0.003458	0.02466	0.02022	0.06422	0.725	1.084	1.371	1.063
BA	PB	0.778	0.141	0.01589	0.00611	0.971	1.029	0.396	1.05
BA	PE	0.03898	0.09666	0.06777	0.113	1.064	1.18	1.062	0.956
BA	PI	0.01163	0.005555	-	-	0.786	1.122	-	-
BA	PR	0.006287	0.01467	0.003333	0.001555	1.523	1.118	1.128	0.984
BA	RJ	0.08174	0.0761	0.0008888	0.0005555	1.074	1.072	0.818	1.094
BA	RN	0.008488	0.014	0.03077	0.001889	1.816	1.219	1.42	0.76
BA	RO	0.004087	0.007555	-	-	1.36	1.096	-	-
BA	RR	0.004087	0.0004444	-	-	1.306	1.212	-	-
BA	RS	0.03552	0.0571	0.009554	0.004	1.257	1.105	1.109	1.045
BA	SC	0.0003144	0.05477	0.001555	0.009554	1.303	0.933	0.765	0.867
BA	SE	0.001886	0.238	-	-	1.097	0.881	-	-
BA	SP	0.852	2.863	0.02378	0.008777	1.135	0.701	0.936	1.159
BA	TO	0.002515	0.106	0.05877	0.005222	0.956	1.122	1.228	1.049
CE	AC	0	0.01811	-	-	1.313	1.13	-	-
CE	AL	0.391	0.263	-	-	1.096	1.144	-	-
CE	AM	0.07042	8.837	-	-	1.185	0.754	-	-
CE	AP	0	0.001111	-	-	1.165	1.076	-	-
CE	BA	0.0009431	0.06099	-	-	1.044	1.069	-	-
CE	DF	0	0.208	-	-	0.88	1.08	-	-
CE	ES	0	0.107	-	-	0.958	1.108	-	-
CE	GO	0	2.935	-	-	1.409	0.714	-	-
CE	International	7.481	61.696	-	-	1.17	4.677	-	-
CE	MA	0	0.0006666	-	-	1.245	1.087	-	-
CE	MG	0.02546	0.05077	-	-	1.121	1.119	-	-
CE	MS	0	0.002222	-	-	0.854	1.17	-	-
CE	MT	0	0.0001111	-	-	1.309	1.197	-	-
CE	PA	0.07702	10.942	-	-	1.238	0.91	-	-
CE	PB	1.991	11.882	-	-	0.736	0.983	-	-
CE	PE	8.552	18.48	-	-	1.149	1.47	-	-
CE	PI	0.353	10.423	-	-	0.989	0.849	-	-
CE	PR	0	8.238	-	-	1.353	0.742	-	-
CE	RJ	0.001886	0.448	-	-	1.155	0.897	-	-
CE	RN	6.608	30.447	-	-	0.917	2.356	-	-
CE	RO	0	0.148	-	-	1.406	1.085	-	-
CE	RR	0.0006287	0.0001111	-	-	1.295	1.179	-	-
CE	RS	0.803	0.788	-	-	1.117	0.987	-	-
CE	SC	1.016	11.158	-	-	0.909	0.945	-	-
CE	SE	0	3.666	-	-	0.931	0.554	-	-
CE	SP	15.121	29.198	-	-	1.999	2.271	-	-
CE	TO	0	0.004444	-	-	0.884	1.226	-	-
DF	AC	0.0657	0.006555	-	-	1.329	1.172	-	-
DF	AL	0.0009431	0.06666	0.001666	0.0003333	0.959	1.197	1.087	1.463
DF	AM	0.004401	0.07088	0.001333	0	0.985	0.991	1.269	1.224
DF	AP	0.0006287	0.004555	-	-	0.978	1.162	-	-
DF	BA	0.001572	0.09343	0.0004444	0.0008888	1.241	1.066	0.831	1.146
DF	CE	0.0003144	0.01244	-	-	0.739	1.296	-	-
DF	ES	0	0.009888	0.0006666	0.0004444	1.846	1.094	0.89	0.98
DF	GO	0.122	1.846	0.005333	0.0005555	1.268	0.625	1.116	0.809
DF	International	0.01855	0.02155	0.0009999	0.0002222	1.015	1.223	1.318	0.839
DF	MA	0.01226	0.02755	0.01367	0.0001111	1.327	1.133	1.01	0.666
DF	MG	0.0006287	0.0006666	0.0004444	0.0007777	1.298	1.219	1.303	1.013
DF	MS	0.001257	0.001111	0.002555	0.0004444	1.14	1.152	0.75	1.06
DF	MT	0.006916	0.002889	0.008999	0	1.219	1.132	0.657	1.351
DF	PA	0.0003144	0.004444	-	-	1.046	1.123	-	-
DF	PB	0.0003144	0.003111	0.001778	0.0002222	1.262	1.152	0.906	1.035
DF	PE	0.004715	0.004777	0.001889	0.0002222	0.914	1.146	1.034	0.843
DF	PI	0.004087	0.008666	-	-	1.284	1.095	-	-
DF	PR	0.006602	0.18	0.003222	0.0002222	1.154	1.061	0.968	1.088
DF	RJ	0.009745	0.604	0.004	0.0005555	1.08	1.09	1.445	1.189
DF	RN	0.005344	0.00811	0.0005555	0.0004444	0.946	0.981	1.352	0.855
DF	RO	0.002201	0.003555	-	-	1.59	1.215	-	-
DF	RR	0.005973	0.006333	-	-	1.168	1.102	-	-
DF	RS	0.03332	0.153	0.002	0.0001111	0.811	1.083	0.926	1.793
DF	SC	0.001572	0.278	0.003555	0.0002222	1.177	1.073	1.044	0.999
DF	SE	0.0003144	0.003555	-	-	0.917	1.318	-	-
DF	SP	0.00503	0.04511	0.001555	0.004111	1.724	1.293	0.775	1.312
DF	TO	0.03207	0.03755	0.04355	0.001333	0.951	1.282	0.675	0.743
ES	AC	0.0006287	0.002555	-	-	1.345	1.079	-	-
ES	AL	0.0003144	0.003555	0.001666	0.004555	0.843	1.201	0.886	0.884
ES	AM	0.003144	0.003222	0.001111	0.0004444	1.319	1.156	1.197	1.132
ES	AP	0.001572	0.004222	-	-	1.242	1.143	-	-
ES	BA	0.007545	0.397	0.0004444	0.003555	1.377	0.898	0.922	0.777
ES	CE	0.001572	0.102	-	-	0.885	1.052	-	-
ES	DF	0.002201	0.0008888	0.001444	0.002666	1.14	1.137	0.904	0.729
ES	GO	0	0.002777	0.003333	0.001444	1.405	1.222	1.399	0.678
ES	International	0.01415	5.991	0.001555	0.004111	1.268	0.902	1.088	1.109
ES	MA	0	0.008332	0.01033	0.004666	0.794	1.074	1.047	1.051
ES	MG	0	0.185	0.006444	0.02611	1.237	1.058	1.26	0.905
ES	MS	0.001257	0.0006666	0.01144	0.001889	0.95	1.155	1.132	0.572
ES	MT	0.0003144	0.0005555	0.01155	0.02133	1.176	1.205	0.781	0.89
ES	PA	0.0003144	0.459	-	-	0.954	0.859	-	-
ES	PB	0	0.002444	0.001778	0.008777	1.329	1.14	1.204	1.166
ES	PE	0.0006287	0.007555	0.001778	0.002889	1.117	1.118	0.872	1.25
ES	PI	0.002829	0.001889	-	-	0.973	1.198	-	-
ES	PR	0.001257	0.011	0.0005555	0.005444	0.936	1.059	0.95	1.156
ES	RJ	0	0.171	0.0007777	0.001889	1.449	1.088	1.041	1.321
ES	RN	0.0009431	0.004777	0.001222	0.001222	0.961	1.01	0.964	1.106
ES	RO	0.0009431	6.416	0.004555	0.003444	1.351	0.794	1.335	1.222
ES	RR	0.001257	0.003888	-	-	1.218	1.18	-	-
ES	RS	0.002201	0.003222	-	-	1.119	1.191	-	-
ES	SC	0	4.123	0.003666	0.06999	1.443	0.696	0.766	1.011
ES	SE	0.003772	0.002222	-	-	1.144	1.104	-	-
ES	SP	0.002201	1.79	0.0006666	0.0008888	1.268	1.014	1.402	0.993
ES	TO	0.008488	0.102	0.03189	0.03466	0.902	0.998	1.214	1.301
GO	AC	0.002201	0.01844	-	-	0.974	1.081	-	-
GO	AL	0.001257	0.02089	0.0002222	0.002	1.202	1.279	1.1	0.719
GO	AM	0.008488	0.04877	0.005444	0.0002222	1.405	1.168	1.355	1.002
GO	AP	0.0003144	0.001444	-	-	1.218	1.159	-	-
GO	BA	0.113	0.002555	0.0002222	0.001666	1.288	1.179	1.152	1.1
GO	CE	0.008174	0.139	-	-	1.036	1.079	-	-
GO	DF	0.18	0.167	0.001889	0.004111	0.829	0.999	0.698	0.873
GO	ES	0	0.01178	0.0002222	0.001444	1.103	1.098	1.041	1.196
GO	International	0.02043	0.02711	0.07544	1.015	1.436	1.138	0.786	0.464
GO	MA	0.01949	0.05388	0.06777	0.001666	1.106	1.128	1.324	0.961
GO	MG	0.281	0.01055	0.001666	0.04677	1.278	1.161	0.926	0.782
GO	MS	0.01383	0.002777	0.05255	0.004444	1.011	1.124	0.947	1.24
GO	MT	0.01037	0.0005555	0.005999	0.004222	1.447	1.247	0.936	0.893
GO	PA	1.191	0.164	-	-	0.894	0.977	-	-
GO	PB	0.01886	0.002555	0.003666	0.0003333	1.513	1.096	1.087	1.421
GO	PE	0.02483	0.007333	0.06222	0.001333	1.487	1.269	0.554	0.787
GO	PI	0.00723	0.07299	-	-	1.564	1.175	-	-
GO	PR	0.004401	0.007777	0.002666	0.001111	1.287	1.201	1.309	0.766
GO	RJ	0.04244	0.005333	0.0007777	0.0005555	1.171	1.099	1.123	1.321
GO	RN	0.004087	1.234	0.003	0.0009999	1.594	0.837	1.287	0.972
GO	RO	0.01352	0.195	0.0002222	0.0003333	0.791	1.087	1.147	1.201
GO	RR	0.008174	0.05499	-	-	1.077	1.043	-	-
GO	RS	0.124	0.08055	-	-	0.858	1.097	-	-
GO	SC	0.06727	0.79	0.004888	0.0006666	1.522	0.869	0.825	1.598
GO	SE	0.0003144	0.02755	-	-	1.886	1.175	-	-
GO	SP	4.496	0.664	0.002	0.0004444	1.041	1.003	1.083	1.127
GO	TO	0.499	3.138	0.008666	0.02677	0.976	0.77	1.071	0.879
International	AC	0	9.759	-	-	1.266	0.178	-	-
International	AL	0	28.285	0.01933	0.005222	1.119	0.266	1.249	0.952
International	AM	18.097	36.95	0.07766	0.003777	0.226	0.345	0.858	1.048
International	AP	0	4.537	-	-	1.228	0.333	-	-
International	BA	34.073	66.622	15.291	0.001111	0.42	0.616	0.374	1.041
International	CE	25.077	42.554	-	-	0.317	0.395	-	-
International	DF	11.046	54.522	2.655	0.01611	0.265	0.503	0.364	1.354
International	ES	0	8.548	0.01789	0.002333	1.145	0.633	1.089	1.079
International	GO	4.955	43.952	5.096	0.004777	1.037	0.407	0.246	1.123
International	MA	0	0.0004444	0.08388	0.009332	1.187	1.139	0.974	1.076
International	MG	54.813	31.267	0.01878	0.112	0.66	0.292	0.652	0.758
International	MS	2.911	24.987	0.004555	0.0009999	0.61	0.238	1.152	0.962
International	MT	0	0	0.0001111	0.00811	1.211	1.142	1.128	1.083
International	PA	0.44	23.522	-	-	0.785	0.224	-	-
International	PB	1.238	12.544	0.002222	0.001555	0.838	0.463	1.556	0.801
International	PE	13.033	35.837	8.141	0.21	0.398	0.336	0.222	0.798
International	PI	2.02	0.661	-	-	1.012	1.01	-	-
International	PR	0.006287	70.872	13.693	0.009777	1.321	0.652	0.358	1.034
International	RJ	97.666	72.799	31.459	0.001111	1.175	0.668	0.771	1.463
International	RN	0.545	17.852	0.121	0.004999	1.281	0.198	0.891	0.882
International	RO	13.169	48.882	-	-	0.264	0.453	-	-
International	RR	0.01352	3.602	-	-	1.215	0.604	-	-
International	RS	76.152	105.118	19.122	0.003777	0.919	0.965	0.452	0.786
International	SC	32.324	77.855	45.289	0.003	0.404	0.714	1.084	0.97
International	SE	0.001886	7.112	-	-	0.975	0.443	-	-
International	SP	629.28	396.769	136.238	0.0002222	7.47	3.598	3.237	1.5
International	TO	0	25.842	0.002555	0.0008888	1.324	0.245	1.04	1.229
MA	AC	0.0009431	0.0007777	-	-	1.308	0.988	-	-
MA	AL	0.0003144	0.0002222	0.006222	0.01444	0.967	0.998	0.922	1.122
MA	AM	0.001572	0.0003333	0.0002222	0.07466	0.866	0.916	1.287	0.808
MA	AP	0	0.0001111	-	-	1.45	1.133	-	-
MA	BA	0	0.0005555	0.0001111	17.546	1.171	1.033	0.661	0.351
MA	CE	0	0.0006666	-	-	1.314	1.154	-	-
MA	DF	0	0.001333	0.0008888	0.004444	1.252	1.171	1.194	1.288
MA	ES	0.0006287	0.0005555	0	6.098	1.313	1.131	0.966	0.49
MA	GO	0.001257	0.004777	0.0005555	4.852	0.795	0.914	0.903	0.115
MA	International	0	0.0002222	0.0001111	10.627	1.382	1.208	0.642	0.224
MA	MG	0.001572	0.002111	0.0003333	0.166	0.969	1.075	0.95	1.046
MA	MS	0	0.0004444	0.0001111	0.08055	0.891	1.074	1.092	0.931
MA	MT	0	0.0003333	0.001333	0.004555	1.354	1.094	1.417	1.109
MA	PA	0.0003144	0.001333	-	-	1.121	1.138	-	-
MA	PB	0	0.0006666	0.0001111	0.01355	0.954	1.08	1.007	0.829
MA	PE	0	0	0.0002222	12.376	1.029	1.073	0.876	0.255
MA	PI	0	0	-	-	1.283	1.23	-	-
MA	PR	0.0003144	0	0.0009999	93.958	1.139	0.822	1.134	1.849
MA	RJ	0.0006287	0.004555	0.0002222	61.923	1.104	1.092	1.187	1.217
MA	RN	0	0.008444	0.0003333	0.271	1.275	1.033	0.96	1.043
MA	RO	0.0003144	0.001555	-	-	1.746	1.127	-	-
MA	RR	0	0.0003333	-	-	1.001	0.939	-	-
MA	RS	0.001886	0.004999	0.0007777	15.301	0.793	1.051	0.871	0.315
MA	SC	0.0003144	0	0	84.129	0.894	1.235	0.733	1.677
MA	SE	0.0003144	0.0001111	-	-	1.005	1.087	-	-
MA	SP	0	0.0003333	0.0003333	70.731	1	1.181	0.894	1.42
MA	TO	0.0003144	0.0001111	0.002777	0	1.03	1.324	1.418	0.912
MG	AC	0.157	0.009666	-	-	1.035	1.219	-	-
MG	AL	0.1	0.08288	0.0002222	0	1.092	1.126	1.25	0.963
MG	AM	0.02358	0.163	0.004	0	0.908	0.902	1.128	1.28
MG	AP	0	0.007555	-	-	1.388	1.131	-	-
MG	BA	0.223	0.03588	0.0004444	0.0001111	0.816	1.223	1.01	1.214
MG	CE	0.03678	0.854	-	-	1.278	0.804	-	-
MG	DF	0.02546	0.007777	0.001111	0.006777	1.237	1.12	0.939	0.812
MG	ES	0.00723	0.04777	0.07121	0	1.505	1.061	1.173	0.565
MG	GO	0.723	0.11	0.003	0.0006666	1.011	1.15	0.796	1.059
MG	International	0.356	0.04711	0.03988	0.0001111	1.248	1.143	1.469	0.96
MG	MA	0.007545	0.012	0.02211	0.001111	1.061	1.099	1.052	0.696
MG	MS	0.002829	0.005111	0.007888	0.0009999	0.832	1.023	0.839	1.091
MG	MT	0.197	0.002555	0.175	0	1.216	1.157	0.673	1.035
MG	PA	0.01918	0.03489	-	-	1.233	0.978	-	-
MG	PB	0.09117	0.005222	0.0007777	0.0006666	1.041	1.043	1.122	1.343
MG	PE	3.61	0.313	0.0006666	0.0005555	0.954	1.006	1.152	0.9
MG	PI	0.00503	0.002555	-	-	1.149	1.175	-	-
MG	PR	0.002829	0.313	0.01255	0.0002222	1.489	0.976	1.176	0.685
MG	RJ	0.876	0.06966	0.005888	0	0.771	1.028	0.837	1.141
MG	RN	0.126	0.02455	0.002777	0	0.75	1.194	0.958	0.674
MG	RO	0.07199	0.03033	-	-	1.089	1.268	-	-
MG	RR	0.006602	0.001444	-	-	0.934	1.116	-	-
MG	RS	0.04024	0.008221	0.0009999	0.0001111	0.849	1.183	0.924	1.057
MG	SC	0.364	0.02911	0.0004444	0.0004444	1.241	1.108	1.151	1.21
MG	SE	0.02515	0.005444	-	-	1.138	1.282	-	-
MG	SP	10.45	2.043	0.01966	0	1.355	0.884	1.08	1.445
MG	TO	0.02641	0.06744	0.07899	0	1.615	1.059	0.996	1.162
MS	AC	0.0006287	0.005444	-	-	0.565	1.36	-	-
MS	AL	0.001257	0.0006666	0.0004444	0.02877	1.011	1.084	1.436	1.447
MS	AM	0.0009431	0.001333	0	0.0002222	1.458	1.139	0.834	0.896
MS	AP	0	0.0001111	-	-	1.551	1.236	-	-
MS	BA	0.08928	0.001222	0.0006666	0.004	0.86	1.118	1.353	1.057
MS	CE	0	0.03766	-	-	1.539	1.119	-	-
MS	DF	0.0009431	0.007999	0.0003333	0.01733	1.158	1.183	1.265	0.716
MS	ES	0.0003144	1.272	0.0003333	0.0003333	1.027	0.629	1.089	0.832
MS	GO	0.02075	0.01522	0.0009999	0.09588	1.494	1.129	1.713	1.145
MS	International	0.01226	0.173	0.0001111	0.0004444	1.098	1.043	1.483	1.397
MS	MA	0	0.007444	0.002222	0.006777	1.286	1.233	1.131	1.431
MS	MG	0.002829	0.002	0.0007777	0.003222	0.953	1.129	1.695	0.952
MS	MT	0.0003144	0.004111	0.01322	0.005333	1.553	1.122	0.742	0.995
MS	PA	0	0.002333	-	-	1.286	1.181	-	-
MS	PB	0.006916	0.001555	0.0004444	0.0001111	0.916	1.253	1.058	1.204
MS	PE	0	0.002555	0.0006666	0.002555	1.358	1.173	0.797	1.019
MS	PI	0	0.002333	-	-	1.426	1.092	-	-
MS	PR	0.0009431	4.964	0.001111	0.003555	0.952	0.774	0.799	1.372
MS	RJ	0.02735	0.006888	0.0001111	0.002111	0.933	1.084	0.905	1.239
MS	RN	0.0006287	0.007999	0	0.0002222	1.071	0.914	0.898	1.367
MS	RO	0	0.005111	-	-	1.279	1.193	-	-
MS	RR	0	0.002333	-	-	1.223	1.094	-	-
MS	RS	0.135	0.002555	0.0003333	0.02766	1.064	1.106	0.891	1.259
MS	SC	0.002201	0.01011	0.0009999	0.0009999	1.568	1.203	1.257	1.193
MS	SE	0.005973	0.006333	-	-	1.351	1.203	-	-
MS	SP	0.165	0.261	0.0002222	0.03522	0.922	1.087	0.584	1.282
MS	TO	0.006602	0.02122	0.01622	0.09221	0.871	1.046	1.169	1.041
MT	AC	0.003144	0.02555	-	-	0.865	1.021	-	-
MT	AL	0.01666	0.001889	0	0	1.07	1.076	1.004	1.23
MT	AM	0.0009431	0.01055	0.0008888	0	1.138	1.055	1.074	1.05
MT	AP	0	0.003777	-	-	1.226	0.919	-	-
MT	BA	0	0.001111	0	0.0002222	1.227	1.289	0.912	0.899
MT	CE	0.0003144	0.003222	-	-	1.065	1.109	-	-
MT	DF	0.001257	0	0.001555	0.01111	1.174	1.22	0.867	1.182
MT	ES	0.001572	0.002666	0.0001111	0.0009999	0.815	1.217	1.445	1.173
MT	GO	0.04464	0.002889	0.0002222	0.0003333	1.078	1.124	1.074	1.678
MT	International	0.01949	0.002555	0.002444	0.0008888	0.861	1.149	1.089	0.902
MT	MA	0.001886	0.01222	0.002222	0.004777	0.945	1.072	1.077	0.966
MT	MG	0.003144	0.001778	0.001889	0.0001111	1.262	1.195	1.165	0.992
MT	MS	0.0009431	0.134	0.001333	0	0.873	0.87	1.02	0.865
MT	PA	0.002829	0.246	-	-	1.155	0.908	-	-
MT	PB	0.0003144	0.001778	0.0003333	0	1.372	0.933	1.204	1.294
MT	PE	0.0003144	0.005999	0.001666	0.0002222	0.93	1.088	0.52	1.063
MT	PI	0	0.002111	-	-	1.343	1.155	-	-
MT	PR	0.0006287	0.001778	0.001555	0.0005555	1.175	1.152	0.733	0.682
MT	RJ	0	0.007444	0	0.0001111	1.474	1.117	1.514	0.713
MT	RN	0.0009431	0.002555	0.0006666	0.0005555	1.187	1.046	1.355	0.571
MT	RO	0.0006287	0.09221	-	-	1.122	0.861	-	-
MT	RR	0.0003144	0.002111	-	-	1.053	1.105	-	-
MT	RS	0.01069	0.002777	0	0.0004444	1.214	1.128	1.101	0.819
MT	SC	0.09022	0.0004444	0.0003333	0.0005555	0.866	1.077	1.066	1.3
MT	SE	0	0.0005555	-	-	1.347	1.228	-	-
MT	SP	0.02546	0.02033	0.0001111	0.0002222	0.745	0.922	0.995	1.232
MT	TO	0.001886	0.01344	0.002666	0.004444	1.314	1.068	0.965	1.289
PA	AC	0.002515	0.01833	-	-	0.821	1.026	-	-
PA	AL	0.002201	0.003666	-	-	1.195	1.119	-	-
PA	AM	0	0.019	-	-	1.236	1.186	-	-
PA	AP	0.04936	2.911	-	-	0.766	0.465	-	-
PA	BA	0.01446	0.01189	-	-	0.979	1.18	-	-
PA	CE	0.005344	0.0661	-	-	1.093	1.008	-	-
PA	DF	0.0009431	0.004555	-	-	1.322	1.361	-	-
PA	ES	0	0.007555	-	-	0.938	1.143	-	-
PA	GO	0.01037	0.04777	-	-	0.842	1.181	-	-
PA	International	0.02986	0.03155	-	-	0.693	1.07	-	-
PA	MA	0.011	0.04055	-	-	1.127	1.124	-	-
PA	MG	0.011	0.008221	-	-	1.456	1.08	-	-
PA	MS	0.001886	0.02355	-	-	1.409	1.063	-	-
PA	MT	0.005344	0.04544	-	-	1.687	1.024	-	-
PA	PB	0.002829	0.008221	-	-	0.932	0.988	-	-
PA	PE	0.002201	0.03744	-	-	0.951	1.142	-	-
PA	PI	0.002201	0.005222	-	-	1.212	1.08	-	-
PA	PR	0.001886	0.00911	-	-	1.321	1.08	-	-
PA	RJ	0.003772	0.008332	-	-	0.895	1.207	-	-
PA	RN	0.006602	0.171	-	-	1.409	0.873	-	-
PA	RO	0.07388	0.007999	-	-	1.032	1.09	-	-
PA	RR	0.001886	0.002666	-	-	0.787	1.11	-	-
PA	RS	0.02672	0.01022	-	-	1.058	1.045	-	-
PA	SC	0.006602	0.006999	-	-	0.86	1.206	-	-
PA	SE	0.007859	0.004333	-	-	0.804	1.127	-	-
PA	SP	0.003772	0.04688	-	-	0.819	1.218	-	-
PA	TO	0.03678	0.181	-	-	1.235	0.923	-	-
PB	AC	0.009745	0.001333	-	-	0.994	1.315	-	-
PB	AL	0.009745	0.04533	0	0.00711	1.107	1.049	1.58	1.305
PB	AM	0	0.53	0.0009999	0.0001111	1.4	0.763	0.762	1.044
PB	AP	0	0.001555	-	-	1.329	1.152	-	-
PB	BA	0.001572	0.627	0.0007777	0.0002222	1.22	0.944	1.152	1.551
PB	CE	0.0635	0.08077	-	-	1.055	1.109	-	-
PB	DF	0.00503	0.004	0.0006666	0.0008888	0.92	1.216	1.021	0.95
PB	ES	0.0003144	0.003111	0.001889	0.0007777	1.352	1.216	1.015	1.094
PB	GO	0.001886	0.007999	0.003444	0.002	1.239	1.164	0.778	0.51
PB	International	0.007545	0.129	0.01011	0.0001111	1.403	0.94	1.2	1.012
PB	MA	0.0009431	0.006888	0.001666	0.001666	1.446	1.052	0.97	1.367
PB	MG	0.02421	0.007444	0.0003333	0.0003333	0.875	0.937	1.121	1.161
PB	MS	0.0006287	0.0009999	0.003666	0.0002222	0.858	1.101	1.049	1.267
PB	MT	0.001572	0.0001111	0.01289	0.002333	1.27	1.092	0.932	0.915
PB	PA	0.0009431	0.023	-	-	0.823	1.078	-	-
PB	PE	1.008	1.032	0.866	0.0002222	0.429	0.828	0.542	0.801
PB	PI	0.001572	0.001444	-	-	1.06	1.091	-	-
PB	PR	0	0.208	0.03433	0.004555	1.253	1.168	1.251	0.723
PB	RJ	0.01446	0.03233	0.002	0.04899	1.125	1.228	0.874	0.874
PB	RN	0	0.16	0.0004444	0.0008888	0.993	1.112	1.277	0.395
PB	RO	0	0.009999	-	-	1.717	1.052	-	-
PB	RR	0	0.002	-	-	1.064	1.229	-	-
PB	RS	0.02986	0.01011	0.002222	0.01589	1.295	1.198	1.013	0.782
PB	SC	0.02389	0.02233	0.08932	0.402	0.945	1.038	1.111	0.763
PB	SE	0.0003144	0.002	-	-	1.045	1.15	-	-
PB	SP	0.389	2.699	0.009221	0.001444	0.795	0.864	1.303	0.591
PB	TO	0.0006287	0.07121	0.00811	0.05677	1.508	0.992	1.365	1.588
PE	AC	0.004715	0.003888	-	-	1.203	1.21	-	-
PE	AL	0.133	0.105	0.001444	0.01189	0.898	1.269	1.064	0.945
PE	AM	0.004401	0.05344	0.001444	0.004888	1.073	1.144	1.111	0.861
PE	AP	0.0003144	0.002444	-	-	0.969	1.084	-	-
PE	BA	0.128	2.129	0.006888	0.02344	1.089	0.836	1.072	1.369
PE	CE	0.003458	0.153	-	-	0.85	1.053	-	-
PE	DF	0.0009431	0.01089	0.003222	0.001778	1.188	1.036	1.132	0.778
PE	ES	0.001572	0.01478	0.0007777	0.0009999	1.218	1.014	1.219	0.987
PE	GO	0.0003144	0.02955	2.046	0.004555	1.103	1.314	0.966	1.32
PE	International	0.14	0.953	2.365	0.304	1.026	0.947	1.154	0.993
PE	MA	0.003458	0.009999	0.004666	0.119	0.908	1.239	1.324	0.789
PE	MG	0.833	0.102	0.001889	0.03389	0.98	1.125	0.884	0.761
PE	MS	0.001886	0.0006666	0.005333	0.001333	0.964	1.155	1.051	1.478
PE	MT	0.002201	0.004222	0.004777	0.003222	0.849	1.171	0.93	0.842
PE	PA	0.0591	0.06266	-	-	1.282	1.174	-	-
PE	PB	0.04998	0.007221	0.001444	0.001111	1.264	1.081	1.33	1.153
PE	PI	0.01635	0.002111	-	-	0.687	1.182	-	-
PE	PR	0.01195	0.71	0.0009999	0.02944	0.969	1.045	0.743	0.782
PE	RJ	0.008488	0.107	0.0007777	0.007777	0.657	0.898	0.94	1.081
PE	RN	0.0437	1.248	0.011	0.05066	1.177	0.637	0.755	1.031
PE	RO	0.02138	0.01122	-	-	0.598	1.221	-	-
PE	RR	0.01257	0.003333	-	-	0.936	1.095	-	-
PE	RS	0.306	0.00911	0.002444	0.004222	0.947	1.283	1.405	0.72
PE	SC	0.123	0.01078	0.0003333	0.001555	1.099	1.162	1.094	0.847
PE	SE	0.08865	0.001555	-	-	0.644	1.122	-	-
PE	SP	0.22	0.397	0.06855	0.003111	1.326	1.188	1.309	0.682
PE	TO	0.0009431	0.033	0.009666	0.01944	1.355	1.208	1.159	1.714
PI	AC	0.004087	0.004111	-	-	0.998	1.029	-	-
PI	AL	0.00723	0.008888	-	-	1.104	1.133	-	-
PI	AM	0	0.0004444	-	-	1.345	1.236	-	-
PI	AP	0.0003144	0.001333	-	-	0.89	0.898	-	-
PI	BA	0.006916	0.001666	-	-	1.38	1.174	-	-
PI	CE	0.03489	0.001111	-	-	1.258	1.047	-	-
PI	DF	0.0003144	0.0003333	-	-	1.45	1.24	-	-
PI	ES	0.001572	0.006444	-	-	0.807	1.115	-	-
PI	GO	0.001572	0.004111	-	-	1.298	1.091	-	-
PI	International	0	0.002	-	-	0.963	1.163	-	-
PI	MA	0.01257	0.006333	-	-	0.791	1.134	-	-
PI	MG	0	0.003	-	-	1.446	1.283	-	-
PI	MS	0	0.0007777	-	-	1.274	1.237	-	-
PI	MT	0.002829	0.002222	-	-	1.137	0.983	-	-
PI	PA	0.004087	0.0002222	-	-	1.071	1.191	-	-
PI	PB	0	0.001333	-	-	1.369	1.258	-	-
PI	PE	0.003772	0.02055	-	-	1.008	1.087	-	-
PI	PR	0.001886	0.003	-	-	1.441	1.175	-	-
PI	RJ	0.0006287	0.004777	-	-	1.314	1.2	-	-
PI	RN	0.011	0.005555	-	-	0.859	1.059	-	-
PI	RO	0.004401	0.00911	-	-	1.264	1.029	-	-
PI	RR	0	0.0009999	-	-	1.296	0.983	-	-
PI	RS	0	0.009443	-	-	1.133	1.189	-	-
PI	SC	0.002201	0.003666	-	-	0.977	1.228	-	-
PI	SE	0.001572	0.001222	-	-	1.038	1.141	-	-
PI	SP	0.0003144	0.001778	-	-	1.082	0.967	-	-
PI	TO	0	0.001333	-	-	1.452	1.156	-	-
PR	AC	0	0.02955	-	-	1.294	1.089	-	-
PR	AL	0.002201	0.08088	0.002111	0.01611	0.578	1.012	1.189	1.002
PR	AM	0.001257	0.09088	0.008666	0.01611	1.211	1.173	1.073	1.343
PR	AP	0.0006287	0.264	-	-	1.031	0.982	-	-
PR	BA	0.0006287	0.187	0.001222	0.623	0.836	1.042	0.766	0.668
PR	CE	0	0.00811	-	-	1.16	1.157	-	-
PR	DF	0.0006287	0.01333	0.006555	0.623	1.028	1.025	1.064	0.859
PR	ES	0.001886	1.123	0.003111	0.118	0.642	0.905	1.005	1.3
PR	GO	0.0009431	0.07888	0.00811	0.118	1.299	1.015	1.298	1.381
PR	International	0	0.41	0.00711	3.583	1.662	1.122	1.338	1.202
PR	MA	0.0006287	0.024	0.07966	3.583	1.87	1.171	1.488	1.391
PR	MG	0	0.885	0.001555	0.01489	0.771	0.866	1.058	0.888
PR	MS	0.001886	0.01178	0.02222	0.01489	1.414	1.223	1.295	1.132
PR	MT	0	0.008666	0.0002222	0.157	0.996	1.008	1.243	1.522
PR	PA	0	0.005999	-	-	1.237	1.141	-	-
PR	PB	0.003144	0.006222	0.004444	0.157	0.825	1.104	0.668	0.64
PR	PE	0	0.226	0.033	3.598	1.429	1.159	0.846	1.145
PR	PI	0.0003144	0.001222	-	-	1.149	1.124	-	-
PR	RJ	0.03867	0.01633	0.113	0.257	0.732	1.231	0.927	1.174
PR	RN	0.002201	0.01155	0.004222	0.257	1.398	1.062	1.438	0.693
PR	RO	0.0006287	0.226	-	-	0.497	1.01	-	-
PR	RR	0.0006287	0.003777	-	-	1.179	1.084	-	-
PR	RS	0.0003144	3.926	0.003333	0.01189	1.059	0.877	1.011	1.735
PR	SC	0.001886	1.406	0.009554	0.01189	1.42	0.914	1.033	1.747
PR	SE	0	0.005999	-	-	0.889	1.101	-	-
PR	SP	0.01195	3.537	0.002444	0.004333	1.075	0.988	1.129	1.025
PR	TO	0	0.251	0.01422	0.004333	1.766	1.059	0.957	1.157
RJ	AC	0.934	0.01155	-	-	1.077	1.186	-	-
RJ	AL	0.01886	0.007333	0.07721	0.645	0.943	0.998	0.757	0.892
RJ	AM	0.6	0.007333	0.157	0.645	0.995	1.233	0.563	1.037
RJ	AP	0	0.0003333	-	-	1.139	1.085	-	-
RJ	BA	0.342	0.826	0.05055	0.06388	0.94	0.985	0.706	1.421
RJ	CE	0.008488	0.05299	-	-	1.315	1.022	-	-
RJ	DF	0.00503	0.134	0.787	0.06388	0.98	1.02	0.707	1.099
RJ	ES	0.002201	0.01167	0.243	0	1.324	1.132	0.92	2.1
RJ	GO	0.0481	0.01955	0.01211	0	1.1	1.196	0.699	1.901
RJ	International	1.918	0.477	0.02189	4.047	1.076	0.885	1.221	0.886
RJ	MA	2.357	0.327	0.124	4.047	0.516	1.012	0.995	0.992
RJ	MG	3.359	0.07888	0.28	0.111	0.924	0.966	0.851	0.901
RJ	MS	0.05218	0.07333	0.131	0.111	0.786	1.093	0.877	2.276
RJ	MT	0.02326	0.001222	0.03222	0.004111	1.409	1	1.219	0.562
RJ	PA	0.03741	0.01733	-	-	1.123	0.917	-	-
RJ	PB	0.706	0.08699	0.136	0.004111	0.866	1.068	0.89	1.924
RJ	PE	2.479	0.01044	0.118	6.779	1.03	1.125	1.254	1.263
RJ	PI	0.006287	0.021	-	-	1.086	1.18	-	-
RJ	PR	0.279	0.008666	0.01944	6.779	0.885	0.972	1.099	0.669
RJ	RN	0.143	0.708	4.527	2.316	1.376	1.029	1.599	2.63
RJ	RO	0.006602	0.09021	-	-	1.255	1.015	-	-
RJ	RR	0.001886	0.0009999	-	-	1.015	1.075	-	-
RJ	RS	2.122	0.666	0.696	0	1.162	0.958	0.831	1.493
RJ	SC	1.265	0.131	0.02122	0	1.117	1.151	0.793	1.753
RJ	SE	0	0.007333	-	-	1.565	1.029	-	-
RJ	SP	26.448	0.298	5.142	0.517	2.614	0.995	1.788	8.975
RJ	TO	0.004715	0.02577	0.06833	0.517	1.136	1.123	0.822	0.813
RN	AC	0.0006287	0.009443	-	-	1.147	1.177	-	-
RN	AL	0	0.01067	0.003111	0.001222	1.266	1.26	1.047	0.785
RN	AM	0.00503	0.689	0.0002222	0.001222	1.007	0.715	1.052	1.393
RN	AP	0.0006287	0.003111	-	-	0.864	1.184	-	-
RN	BA	0	0.003555	0.001666	6.144	1.272	1.065	0.987	0.7
RN	CE	0.0009431	0.03866	-	-	1.093	1.288	-	-
RN	DF	0.00503	0.003111	0.01544	6.144	1.449	1.08	0.996	1.027
RN	ES	0.0006287	0.004888	0.002	0.126	1.245	1.168	1.337	1.076
RN	GO	0.001572	0.002333	0.0009999	0.126	1.31	1.244	0.432	1.086
RN	International	0.01446	0.23	0.004999	9.949	0.972	0.954	1.067	1.176
RN	MA	0.007859	0.008777	0.01044	9.949	0.939	1.11	0.775	1.224
RN	MG	0.273	0.007999	0.002333	9.404	0.89	1.204	1.188	0.982
RN	MS	0.002515	0.755	0.0005555	9.404	1.083	0.825	0.845	0.968
RN	MT	0.007859	0.001444	0.003333	0.121	0.723	1.112	1.254	1.152
RN	PA	0.0003144	0.002666	-	-	1.248	1.067	-	-
RN	PB	0.174	6.827	0.0004444	0.121	1.24	0.791	0.971	1.08
RN	PE	0.07702	7.949	0.0007777	2.422	1.137	0.931	0.819	0.967
RN	PI	0.001257	0.02078	-	-	0.968	1.123	-	-
RN	PR	0.004715	0.106	0.001666	2.422	0.996	1.162	1.149	1.355
RN	RJ	0.03898	1.16	0.0003333	0.07366	1.054	0.877	1.023	1.088
RN	RO	0.008174	0.181	-	-	0.749	0.981	-	-
RN	RR	0.00503	0.001666	-	-	1.016	1.106	-	-
RN	RS	0.001257	0.002666	0.009332	11.987	1.233	1.188	1.094	0.689
RN	SC	0.02515	0.007777	0.0004444	11.987	1.176	1.012	1.061	0.81
RN	SE	0.002829	0.003777	-	-	1.313	1.152	-	-
RN	SP	0.122	2.174	0.002889	1.381	0.879	0.944	1.063	1.093
RN	TO	0	0.05133	0.012	1.381	1.129	1.144	0.975	0.944
RO	AC	2.165	4.069	-	-	0.458	0.519	-	-
RO	AL	0.0006287	0.006888	-	-	1.216	1.092	-	-
RO	AM	0.01415	0.004888	-	-	1.442	0.941	-	-
RO	AP	0	0.0006666	-	-	1.079	1.068	-	-
RO	BA	0.01289	0.001555	-	-	1.154	1.189	-	-
RO	CE	0.01163	0.07632	-	-	0.991	1.152	-	-
RO	DF	0.001257	0.403	-	-	0.898	0.791	-	-
RO	ES	0.0006287	0.01322	-	-	0.875	1.189	-	-
RO	GO	0.0003144	0.01766	-	-	1.299	1.218	-	-
RO	International	1.11	5.669	-	-	0.584	0.789	-	-
RO	MA	0	0.829	-	-	1.186	0.781	-	-
RO	MG	0.004087	0.515	-	-	1.269	0.803	-	-
RO	MS	0	0.0003333	-	-	1.098	1.243	-	-
RO	MT	0.008488	0.12	-	-	0.953	1.022	-	-
RO	PA	0.08771	0.001222	-	-	1.163	1.192	-	-
RO	PB	0.001572	0.003888	-	-	1.463	1.111	-	-
RO	PE	0.0003144	0.003666	-	-	1.305	1.274	-	-
RO	PI	0.0003144	0.002222	-	-	0.892	1.043	-	-
RO	PR	0	0.02722	-	-	1.226	1.078	-	-
RO	RJ	0.0009431	0.153	-	-	1.522	1.074	-	-
RO	RN	0	0.424	-	-	1.45	0.942	-	-
RO	RR	0.0009431	0.01078	-	-	0.642	1.007	-	-
RO	RS	0.03458	0.01633	-	-	1.252	1.198	-	-
RO	SC	0.001572	0.01367	-	-	1.359	1.1	-	-
RO	SE	0.0006287	0.002666	-	-	0.751	1.069	-	-
RO	SP	0.243	0.81	-	-	0.911	1.012	-	-
RO	TO	0	0.07177	-	-	1.211	1.072	-	-
RR	AC	0.002829	0.003111	-	-	1.128	1.073	-	-
RR	AL	0.161	0.06766	-	-	1.08	1.202	-	-
RR	AM	0.0003144	1.052	-	-	1.506	0.467	-	-
RR	AP	0	0.0005555	-	-	0.88	1.133	-	-
RR	BA	0.159	0.002111	-	-	0.682	1.126	-	-
RR	CE	0.001572	0.005999	-	-	1.253	1.197	-	-
RR	DF	0.01981	0.003888	-	-	0.918	1.115	-	-
RR	ES	0.001257	0.0009999	-	-	0.904	1.038	-	-
RR	GO	0.00723	0.007221	-	-	0.824	1.134	-	-
RR	International	0.008802	0.01989	-	-	1.197	1.191	-	-
RR	MA	0	0.01278	-	-	1.181	1.075	-	-
RR	MG	0.08236	0.003222	-	-	0.769	1.09	-	-
RR	MS	0.0009431	0.0008888	-	-	0.829	1.21	-	-
RR	MT	0.0003144	0.0009999	-	-	1.076	1.226	-	-
RR	PA	0	0.0009999	-	-	1.158	1.08	-	-
RR	PB	0.0006287	0.01489	-	-	1.163	1.062	-	-
RR	PE	0.001572	0.004111	-	-	1.252	1.114	-	-
RR	PI	0.001572	0.003777	-	-	1.276	1.209	-	-
RR	PR	0.002829	0.01933	-	-	0.946	1.123	-	-
RR	RJ	0.001257	0.006999	-	-	1.08	1.1	-	-
RR	RN	0.001572	0.006555	-	-	1.298	1.034	-	-
RR	RO	0	0.006999	-	-	1.157	1.126	-	-
RR	RS	0.0006287	0.009888	-	-	1.298	1.094	-	-
RR	SC	0	0.001333	-	-	1.155	1.11	-	-
RR	SE	0.0003144	0.003	-	-	1.294	1.118	-	-
RR	SP	0.983	0.01566	-	-	0.821	1.057	-	-
RR	TO	0.001886	0.001222	-	-	0.693	1.219	-	-
RS	AC	0.003144	0.002889	-	-	0.882	1.002	-	-
RS	AL	0.005659	0.006555	1.368	9.07	1.274	1.21	0.902	0.731
RS	AM	0.311	0.004444	0.002777	9.07	1.272	1.163	0.994	1.072
RS	AP	0.0006287	0.005999	-	-	0.832	1.36	-	-
RS	BA	0.05439	0.111	0.009221	5.719	1.164	1.209	1.334	1.111
RS	CE	0	0.01811	-	-	0.882	1.094	-	-
RS	DF	0.05816	0.57	0.004333	5.719	0.965	0.908	0.995	1.08
RS	ES	0	0.02011	0.002222	0.54	1.579	1.066	0.674	1.199
RS	GO	0.591	0.612	0.002222	0.54	0.817	0.843	1.155	1.645
RS	International	20.181	0.646	0.138	0	1.914	0.992	0.89	1.309
RS	MA	0.135	0.248	0.06055	0	1.225	1.022	0.807	0.669
RS	MG	0.397	1.101	1.138	12.266	0.823	0.714	0.621	0.776
RS	MS	0.107	0.003	0.002333	12.266	1.024	1.176	0.716	1.216
RS	MT	0.008488	0.006888	0.005777	7.399	0.973	1.194	0.75	1.153
RS	PA	1.086	0.01122	-	-	0.591	1.054	-	-
RS	PB	0.05061	0.213	0.0004444	7.399	1.18	0.918	1.116	1.28
RS	PE	0.08897	0.00711	0.008221	8.022	1.302	1.108	0.91	1.124
RS	PI	0.01069	0.0007777	-	-	0.583	1.177	-	-
RS	PR	0.01446	0.509	0.001778	8.022	0.857	0.953	0.807	1.063
RS	RJ	0.338	0.07666	0.0001111	47.516	0.904	1.107	1.227	1.527
RS	RN	0.01132	0.004555	0.001111	47.516	1.224	1.161	1.224	1.102
RS	RO	0.005344	2.122	-	-	1.365	0.82	-	-
RS	RR	0.0003144	0.007444	-	-	0.842	1.18	-	-
RS	SC	18.943	13.308	4.842	0.566	1.735	1.228	1.678	0.738
RS	SE	0.03049	0.002333	-	-	0.797	1.054	-	-
RS	SP	1.348	1.641	0.02411	0.02166	0.727	1.012	0.906	1.132
RS	TO	0.005344	0.465	0.03333	0.02166	1.363	1.107	0.804	0.772
SC	AC	0.0006287	0.02666	-	-	1.11	1.052	-	-
SC	AL	0	0.03677	0.02111	0.0002222	1.36	1.125	1.285	1.235
SC	AM	0.00503	0.326	0.02055	0.0002222	1.117	0.823	1.351	1.175
SC	AP	0	0.007444	-	-	1.534	1.284	-	-
SC	BA	0.03018	0.01689	0.002	0.0006666	1.171	0.98	1.112	0.786
SC	CE	0.009745	0.07233	-	-	1.051	1.016	-	-
SC	DF	0.003458	0.377	0.004333	0.0006666	1.104	1.066	1.053	0.96
SC	ES	0.011	0.07544	0.004666	0.01055	0.594	1.093	0.983	1.049
SC	GO	0.0176	0.606	0.01489	0.01055	1.375	0.921	0.714	0.64
SC	International	0.129	0.107	0.01044	0.0002222	0.983	1.073	0.968	1.45
SC	MA	0.01918	0.03922	0.151	0.0002222	1.208	1.157	0.866	1.045
SC	MG	0.202	0.09866	0.004666	0.004444	1.587	1.124	0.823	0.974
SC	MS	0.0009431	0.0003333	0.2	0.004444	1.265	1.267	0.775	1.088
SC	MT	0.011	0.307	0.003666	0.001889	1.378	1.15	1.17	1.03
SC	PA	0.05124	0.09888	-	-	0.667	1.065	-	-
SC	PB	0.004715	0.024	0.03966	0.001889	0.828	1.073	1.384	0.948
SC	PE	0.07042	0.08132	0.0004444	0.005777	1.303	1.092	0.792	1.031
SC	PI	0.002829	0.004111	-	-	1.169	1.106	-	-
SC	PR	0.09431	17.045	0.008555	0.005777	0.839	1.548	1.119	2.091
SC	RJ	0.166	1.097	0.162	0.003444	0.682	1.077	0.959	1.159
SC	RN	0.01352	0.102	0.004777	0.003444	0.809	1.107	0.992	0.822
SC	RO	0.03395	0.01155	-	-	0.985	1.168	-	-
SC	RR	0	0.003888	-	-	1.207	1.202	-	-
SC	RS	4.101	5.342	0.56	0.0006666	0.879	0.883	0.826	1.983
SC	SE	0.00503	0.003	-	-	1.138	1.068	-	-
SC	SP	0.205	7.84	7.035	0.0004444	1.066	1.02	2.079	1.033
SC	TO	0.003144	0.794	0.02522	0.0004444	0.914	1.143	0.932	0.968
SE	AC	0.004087	0.007221	-	-	0.84	1.158	-	-
SE	AL	0	0.0009999	-	-	1.144	1.259	-	-
SE	AM	0.0003144	0.005333	-	-	0.826	1.156	-	-
SE	AP	0.0006287	0.0006666	-	-	1.135	1.221	-	-
SE	BA	0.004715	0.17	-	-	1.117	0.935	-	-
SE	CE	0.003458	0.008221	-	-	1.21	1.039	-	-
SE	DF	0.0009431	0.159	-	-	0.715	0.998	-	-
SE	ES	0.0003144	0.006555	-	-	1.256	0.897	-	-
SE	GO	0.01383	0.009888	-	-	1.1	1.202	-	-
SE	International	0.007545	0.879	-	-	1.092	0.65	-	-
SE	MA	0.02546	0.001666	-	-	0.985	1.171	-	-
SE	MG	0	0.002666	-	-	1.514	1.053	-	-
SE	MS	0	0.003777	-	-	1.353	1.031	-	-
SE	MT	0	0	-	-	1.222	1.052	-	-
SE	PA	0	0.0004444	-	-	1.165	1.101	-	-
SE	PB	0.003458	0.002777	-	-	1.087	1.197	-	-
SE	PE	0.0003144	0.0009999	-	-	1.227	1.176	-	-
SE	PI	0.006287	0.0003333	-	-	0.603	1.133	-	-
SE	PR	0.0006287	0.003777	-	-	1.09	1.071	-	-
SE	RJ	0	0.002222	-	-	1.296	1.238	-	-
SE	RN	0	0.002222	-	-	1.066	1.276	-	-
SE	RO	0.005973	0.013	-	-	1.246	1.08	-	-
SE	RR	0.0003144	0	-	-	1.048	1.205	-	-
SE	RS	0	0.001555	-	-	0.695	0.993	-	-
SE	SC	0.0003144	0.0005555	-	-	1.471	1.304	-	-
SE	SP	0.011	0.05533	-	-	0.86	1.121	-	-
SE	TO	0	0.019	-	-	0.348	1.107	-	-
SP	AC	5.613	19.448	-	-	0.429	0.722	-	-
SP	AL	40.676	92.905	3.527	0.0008888	1.048	3.301	0.734	0.773
SP	AM	33.655	50.669	1.708	0.0008888	0.892	1.815	0.678	0.871
SP	AP	3.953	9.445	-	-	0.143	0.397	-	-
SP	BA	131.103	102.914	8.772	0.01766	3.327	3.644	1.651	1.031
SP	CE	38.759	29.978	-	-	1.01	1.095	-	-
SP	DF	35.328	78.979	3.604	0.01766	0.903	2.813	1.018	0.449
SP	ES	17.187	116.917	7.653	0.0005555	0.466	4.132	1.516	0.967
SP	GO	113.863	43.826	4.003	0.0005555	2.919	1.576	1.055	1.24
SP	International	260.685	95.116	18.205	0.0006666	6.634	3.37	3.202	1.284
SP	MA	0.37	1.256	0.335	0.0006666	1.113	0.783	0.556	2.723
SP	MG	392.878	162.222	15.689	0	9.944	5.723	2.858	0.82
SP	MS	38.987	20.463	1.574	0	1.026	0.755	0.593	1.127
SP	MT	21.145	18.286	0.706	0.005777	0.556	0.68	0.599	1.202
SP	PA	57.796	58.858	-	-	1.489	2.102	-	-
SP	PB	74.521	95.73	6.471	0.005777	1.951	3.398	1.364	1.188
SP	PE	175.059	110.294	4.373	0.001666	4.52	3.909	0.968	1.119
SP	PI	20.5	19.421	-	-	0.547	0.721	-	-
SP	PR	19.53	186.264	0.401	0.001666	0.53	6.577	1.159	0.962
SP	RJ	385.638	158.423	56.829	0.0008888	9.83	5.594	9.806	2.958
SP	RN	64.135	84.14	1.341	0.0008888	1.663	2.979	1.052	1.321
SP	RO	35.281	51.801	-	-	0.924	1.861	-	-
SP	RR	15.085	15.564	-	-	0.4	0.58	-	-
SP	RS	309.56	142.198	11.986	0.122	7.926	5.036	2.222	1.254
SP	SC	170.371	161.896	10.672	0.122	4.357	5.709	2.156	1.027
SP	SE	21.673	36.132	-	-	0.588	1.303	-	-
SP	TO	32.918	38.187	0.576	0.002	0.879	1.381	0.828	1.459
TO	AC	0	0.209	-	-	1.021	0.929	-	-
TO	AL	0.001257	0.32	0.0001111	0.003666	1.581	1.249	1.323	1.077
TO	AM	0.0009431	1.533	0	0.003888	1	0.815	1.05	0.629
TO	AP	0	8.563	-	-	1.346	0.626	-	-
TO	BA	0.01226	5.981	0.0001111	0.01011	1.575	0.832	1.091	1.2
TO	CE	0.001257	7.011	0.0008888	0.0008888	1.726	0.719	0.839	0.999
TO	DF	0.0009431	25.903	-	-	1.532	1.733	-	-
TO	ES	0.005344	0.136	0	0.0006666	1.353	1.043	1.152	1.022
TO	GO	0.01949	114.941	0.0001111	1.035	1.781	7.459	0.985	1.224
TO	International	0.01132	8.637	0.0001111	0.02011	1.152	0.803	1.38	1.101
TO	MA	0.0009431	1.055	0.002555	0.343	1.119	0.939	0.98	0.93
TO	MG	0.02735	5.847	0.003111	0.01711	1.105	0.722	0.97	0.825
TO	MS	0.00503	19.175	0	0.0003333	1.235	1.304	0.803	0.759
TO	MT	0.007859	12.17	0.0003333	0.001444	0.759	0.855	1.108	1.451
TO	PA	0.02138	47.754	-	-	0.899	3.147	-	-
TO	PB	0.002829	1.142	0	0.02189	1.078	0.857	0.987	1.052
TO	PE	0.001257	11.057	0.001222	0.05555	0.997	0.883	0.667	1.107
TO	PI	0.001886	6.312	-	-	1.045	0.532	-	-
TO	PR	0.0003144	3.272	0.0003333	0.005666	1.344	0.897	1.267	1.246
TO	RJ	0.0009431	3.686	0.0005555	0	1.234	0.92	1.254	1.24
TO	RN	0.004715	7.321	0.0001111	0.782	1.399	0.782	1.239	1.097
TO	RO	0.02263	15.762	-	-	1.094	1.095	-	-
TO	RR	0.0132	57.962	-	-	1.349	3.809	-	-
TO	RS	0.007859	0.655	0.0004444	0.09832	1.241	0.974	1.112	0.845
TO	SC	0.001572	9.326	0.0001111	0.001444	1.474	0.871	1.179	1.191
TO	SE	0	0.209	-	-	1.552	1.171	-	-
TO	SP	0.02169	126.456	0.0001111	0.112	0.902	8.182	1.209	0.898
